# 1 Single-Cell Transcriptome Analyses Reveal the Cell Diversity and Developmental Features of 2 Human Gastric and Metaplastic Mucosa

3

4 Ayumu Tsubosaka<sup>1</sup>, Daisuke Komura<sup>1</sup>, Hiroto Katoh<sup>1</sup>, Miwako Kakiuchi<sup>1</sup>, Takumi Onoyama<sup>1,2</sup>, Asami  
5 Yamamoto<sup>1</sup>, Hiroyuki Abe<sup>3</sup>, Yasuyuki Seto<sup>4</sup>, Tetsuo Ushiku<sup>3</sup>, Shumpei Ishikawa<sup>1,5,\*</sup>

6 <sup>1</sup>Department of Preventive Medicine, Graduate School of Medicine, The University of Tokyo, 7-3-1  
7 Hongo, Bunkyo-ku, 1130033, Tokyo, Japan

8 <sup>2</sup>Division of Gastroenterology and Nephrology, Department of Multidisciplinary Internal Medicine, School  
9 of Medicine, Faculty of Medicine, Tottori University, 36-1, Nishicho, Yonago, 683-8504, Tottori, Japan

10 <sup>3</sup>Dpartment of Pathology, Graduate School of Medicine, The University of Tokyo, 7-3-1, Hongo, Bunkyo-  
11 ku, 1130033, Tokyo, Japan

12 <sup>4</sup>Department of Gastrointestinal Surgery, Graduate School of Medicine, The University of Tokyo, 7-3-1,  
13 Hongo, Bunkyo-kyu, 1130033, Tokyo, Japan

14 <sup>5</sup>Division of Pathology, National Cancer Center Exploratory Oncology Research & Clinical Trial Center,  
15 6-5-1, Kashiwanoha, Kashiwa, 277-8577, Chiba, Japan

16 \*Correspondence: [ishum-prm@m.u-tokyo.ac.jp](mailto:ishum-prm@m.u-tokyo.ac.jp)

17

18

## Abstract

19 The stomach is an important digestive organ with a variety of biological functions. However, due to the  
20 complexity of its cellular and glandular composition, the precise cellular biology has yet to be elucidated.  
21 In this study, we conducted single-cell RNA sequence analysis of the human stomach and constructed a  
22 137,610-cell dataset, the largest cell atlas reported to date. By integrating this single-cell analysis with  
23 spatial cellular distribution analysis, we were able to clarify novel aspects of the developmental and  
24 tissue homeostatic ecosystems in the human stomach. We identified *LEFTY1*<sup>+</sup> as a potential stem cell  
25 marker in both gastric and intestinal metaplastic glands. We also revealed skewed distribution patterns

26 for PDGFRA+BMP4+WNT5A+ fibroblasts that play pivotal roles in, or even precede, the phenotypic  
27 changes from gastric to metaplastic mucosa. Our extensive dataset will function as a fundamental  
28 resource in investigations of the stomach, including studies on development, aging, and carcinogenesis.

29

## 30 **INTRODUCTION**

31 The stomach is an essential digestive organ found in many organisms. Its roles include storing and  
32 digesting food, releasing food to the intestine, secreting various digestive enzymes, and releasing  
33 hormones, e.g., gastrin and somatostatin (Voutilainen et al., 2002). Additionally, mucosal immunity is  
34 prevalent in the stomach through exposure to organisms/molecules swallowed during daily life (Nie and  
35 Yuan, 2020). The stomach mucosa consists of epithelial glands with a variety of compositions and  
36 functions that are biologically and histologically classified into three subtypes. One of the signature  
37 glands of the stomach, the fundic gland, is found in the fundus/corpus and composed mainly of chief  
38 cells, parietal cells, endocrine cells, and mucous cells. Another stomach-specific gland, the pyloric gland  
39 (PG), is found in the pylorus and composed mainly of mucous cells and endocrine cells. The other gland  
40 found in the stomach, the intestinal metaplasia (IM) gland, mimics the colorectal epithelial crypt and is a  
41 metaplastic gland associated with atrophy and caused by chronic inflammation, such as that resulting  
42 from *Helicobacter pylori* infection (Wroblewski et al., 2010).

43 Each stomach gland has a dedicated stem cell source (Kim and Shivdasani, 2016); however,  
44 in contrast to other digestive organs, such as the esophagus and intestines, the high cell diversity and  
45 complexity of the stomach has led to difficulty in identifying stomach epithelial stem cells related to  
46 developmental biology. Thus, similarities and differences in the developmental properties of the three  
47 gastric gland subtypes remain to be investigated. Although several stomach epithelial or pan stem cell  
48 markers, such as LGR5, CD44 (Kim and Shivdasani, 2016; Ye et al., 2018), and AQP5 (Tan et al.,  
49 2020), have been proposed, a consensus on such markers has yet to be reached. The identification of  
50 stem cells is important if we are to understand the development of tissues and tumorigenesis. Notably,

51 IM of the gastric mucosa is a well-known pathological condition that results directly in gastric carcinoma  
52 (Wroblewski et al., 2010); therefore, it is important to clarify how metaplastic mucosa arise from  
53 otherwise healthy gastric mucosa. Gastric stem cells may be transformed into intestinal stem cells (Jang  
54 et al., 2015; Simmini et al., 2014); however, the precise developmental properties of gastric and  
55 metaplastic glands have yet to be determined. Moreover, the differences and/or similarities between  
56 intestinal metaplastic gastric mucosa and genuine colorectal mucosa have not been clarified. Cell–cell  
57 communication through signaling molecules, such as cytokines, chemokines, and growth factors, is  
58 fundamental to establishing appropriate local tissue homeostasis in the human body. IM of the stomach  
59 can be triggered by pathological cycles of chronic inflammation and tissue repair; thus, the roadmap to  
60 IM may be affected by cellular communication in the environment of regenerative gastric mucosa,  
61 including that involving epithelial cells and various stromal cells, such as fibroblasts.

62           With the rapid development of single-cell RNA sequencing (scRNA-seq) and its associated  
63 analytical methods (Hao et al., 2021; Stuart et al., 2019), it has become feasible to construct global cell  
64 atlases with single-cell resolution and employ these to perform detailed analyses, e.g., identifying  
65 potential stem cell populations, clarifying developmental trajectories, and determining cell–cell  
66 communications between given cell types. To date, even the largest single cell atlas of the whole human  
67 body (The Tabula Sapiens Consortium, 2022) has not included the stomach scRNA-seq dataset.  
68 Busslinger et al. (2021) reported a scRNA-seq profile of human upper gastrointestinal tract; however, a  
69 specific stomach scRNA-seq dataset has been lacking.

70           In the present study, we constructed the largest ever transcriptional cell atlas of adult human  
71 gastric tissues using scRNA-seq and used it for the analyses as follows: profiling the global cellular  
72 diversity of the complexed gastric mucosa in healthy and metaplastic tissues, identifying possible stem  
73 cell populations in gastric glands, and discovering novel cell–cell communications related to  
74 homeostasis in the studied conditions. By integrating sophisticated bioinformatics analysis of scRNA-  
75 seq data with high-resolution spatial distribution analyses of specific mRNA molecules in human tissues,

76 we not only identified a possible stem cell cluster common among the gastric glands but also clarified  
77 the spatially and functionally defined biological roles of BMP4-secreting fibroblasts found in either  
78 healthy or metaplastic gastric mucosa. As a resource that includes a scRNA-seq dataset with 137,610  
79 cells, our human stomach cell atlas could help researchers provide new insights in the fields of gastric  
80 development, gastric stem cell biology, and gastric carcinogenesis.

81

## 82 **RESULTS and DISCUSSION**

### 83 **Single-cell atlas of normal and IM gastric mucosa**

84 We obtained gastric tissues from 15 patients who underwent gastrectomy at The University of Tokyo  
85 Hospital, and their scRNA-seq data were combined with those of 9 patients from Stanford University  
86 (Sathe et al., 2020) and 9 patients from Tsinghua University (Zhang et al., 2019). These nontumor  
87 gastric tissues were derived from a spectrum of healthy and disease states, including histologically  
88 normal gastric tissues, gastric cancers, intestinal metaplastic mucosa, and gastritis specimens (Table  
89 S1).

90           After exclusion of low quality and doublet cells, 137,610 cells were retained (see Methods;  
91 Figure 1A). After batch effect correction, unsupervised clustering analysis was used to identify 35  
92 clusters. We merged the clusters into seven major cell lineages based on differential gene expression  
93 as follows (Figures 1B and 1C): 39,169 epithelial cells (characterized by *KRT19*, *TFF1*, and *PGA4*),  
94 71,360 B and plasma cells (B cells: *MS4A1*; plasma cells: *IGHG1*, *IGHA1*, *IGKC*, and *IGHG4*), 15,778 T  
95 cells (*CD3D*), 2,002 myeloid cells (*FCGR3A* and *ITGAM*), 5,225 fibroblasts (*COL1A1* and *ACTA2*),  
96 3,071 endothelial cells (*PECAM1* and *VWF*), and 1,005 mast cells (*TPSAB1*). The proportions of cell  
97 types in each clinical procedure or institution are shown in Figure 1D. Some of the samples in our  
98 institution contained exclusively higher proportions of B and plasma cells; thus, we excluded these  
99 samples from this research. Biopsy specimens from Tsinghua University had substantially larger  
100 proportions of epithelial cells, consistent with the fact that gastric biopsies mainly obtain surface

101 mucosa. Additionally, surgical specimens from Stanford University and our institution had a larger  
102 proportion of nonepithelial cells. Overall, by combining three large RNA-seq datasets of the stomach  
103 with different clinical procedures and disease states, we successfully obtained a well-balanced and  
104 diverse cell atlas of the human stomach.

105

## 106 **Epithelial cells**

### 107 **Subcluster determination**

108 We subclustered 39,169 epithelial cells into 11 clusters comprising foveolar subtypes (characterized by  
109 *MUC5AC*, *GKN1*, *GKN2*, *TFF1*, *TFF2*, and *ADH1C*), PG/neck cells (*MUC6*, *PGC*, and *TFF2*), chief cells  
110 (*PGA4*, *PGC*, and *LIPF*), parietal cells (*ATP4A*, *ATP4B*, and *CKB*), enterocytes (*FABP1*, *FABP2*, and  
111 *CDH17*), goblet cells (*MUC2*, *TFF3*, and *SPINK4*), neuroendocrine (NE) cells (*GAST*, *SST*, *GHRL*,  
112 *CHGA*, *MAOB*, and *CHGB*), and proliferating cells (*MKI67*, *HMGB2*, and *STMN1*) (Figures 1E–G; Figure  
113 S1A). The proportion of cells in each subcluster along with the severeness of IM is shown in Figures 1H  
114 and 1I, showing the increase in the number of enterocytes and goblet cells in the severe IM samples.

115 First, we focused on the characteristics of NE cells because they might represent the  
116 interpretable characteristics of each gastric and metaplastic gland. NE cells commonly expressed  
117 *CHGA* and *CHGB* and were clustered into at least five populations, including G cells and D cells,  
118 based on the expression of hormones or enzymes, such as *SST* (D cell marker), *GHRL* (X/A-like cell  
119 marker), *GAST* (G cell marker), and *MAOB* (enterochromaffin cell marker; Figures S1B and S1C;  
120 Busslinger et al. (2021)). Some NE cells expressed *LHB*, as reported by Busslinger et al. (2021).  
121 Interestingly, some NE cells expressed *REG4*, a specific marker of metaplastic mucosa (Zhang et al.,  
122 2019). Some *REG4*<sup>+</sup> NE cells also expressed *GCG* and *PYY*, which are specific to  
123 enteroneuroendocrine cells (Gunawardene et al., 2011). Notably, the severeness of IM (Figure 1I) was  
124 correlated with the frequency of *REG4*<sup>+</sup> NE cells (Figures S1B and S1C), suggesting that IM of the  
125 stomach consists of NE cells with the endocrine features of genuine colonic enteroneuroendocrine

126 cells. The phenotypic similarity between IM of the stomach and colonic mucosa indicates that the  
127 regeneration of atrophic gastric mucosa generates metaplastic mucosa that resembles, both  
128 histologically and functionally, genuine colorectal mucosa.  
129

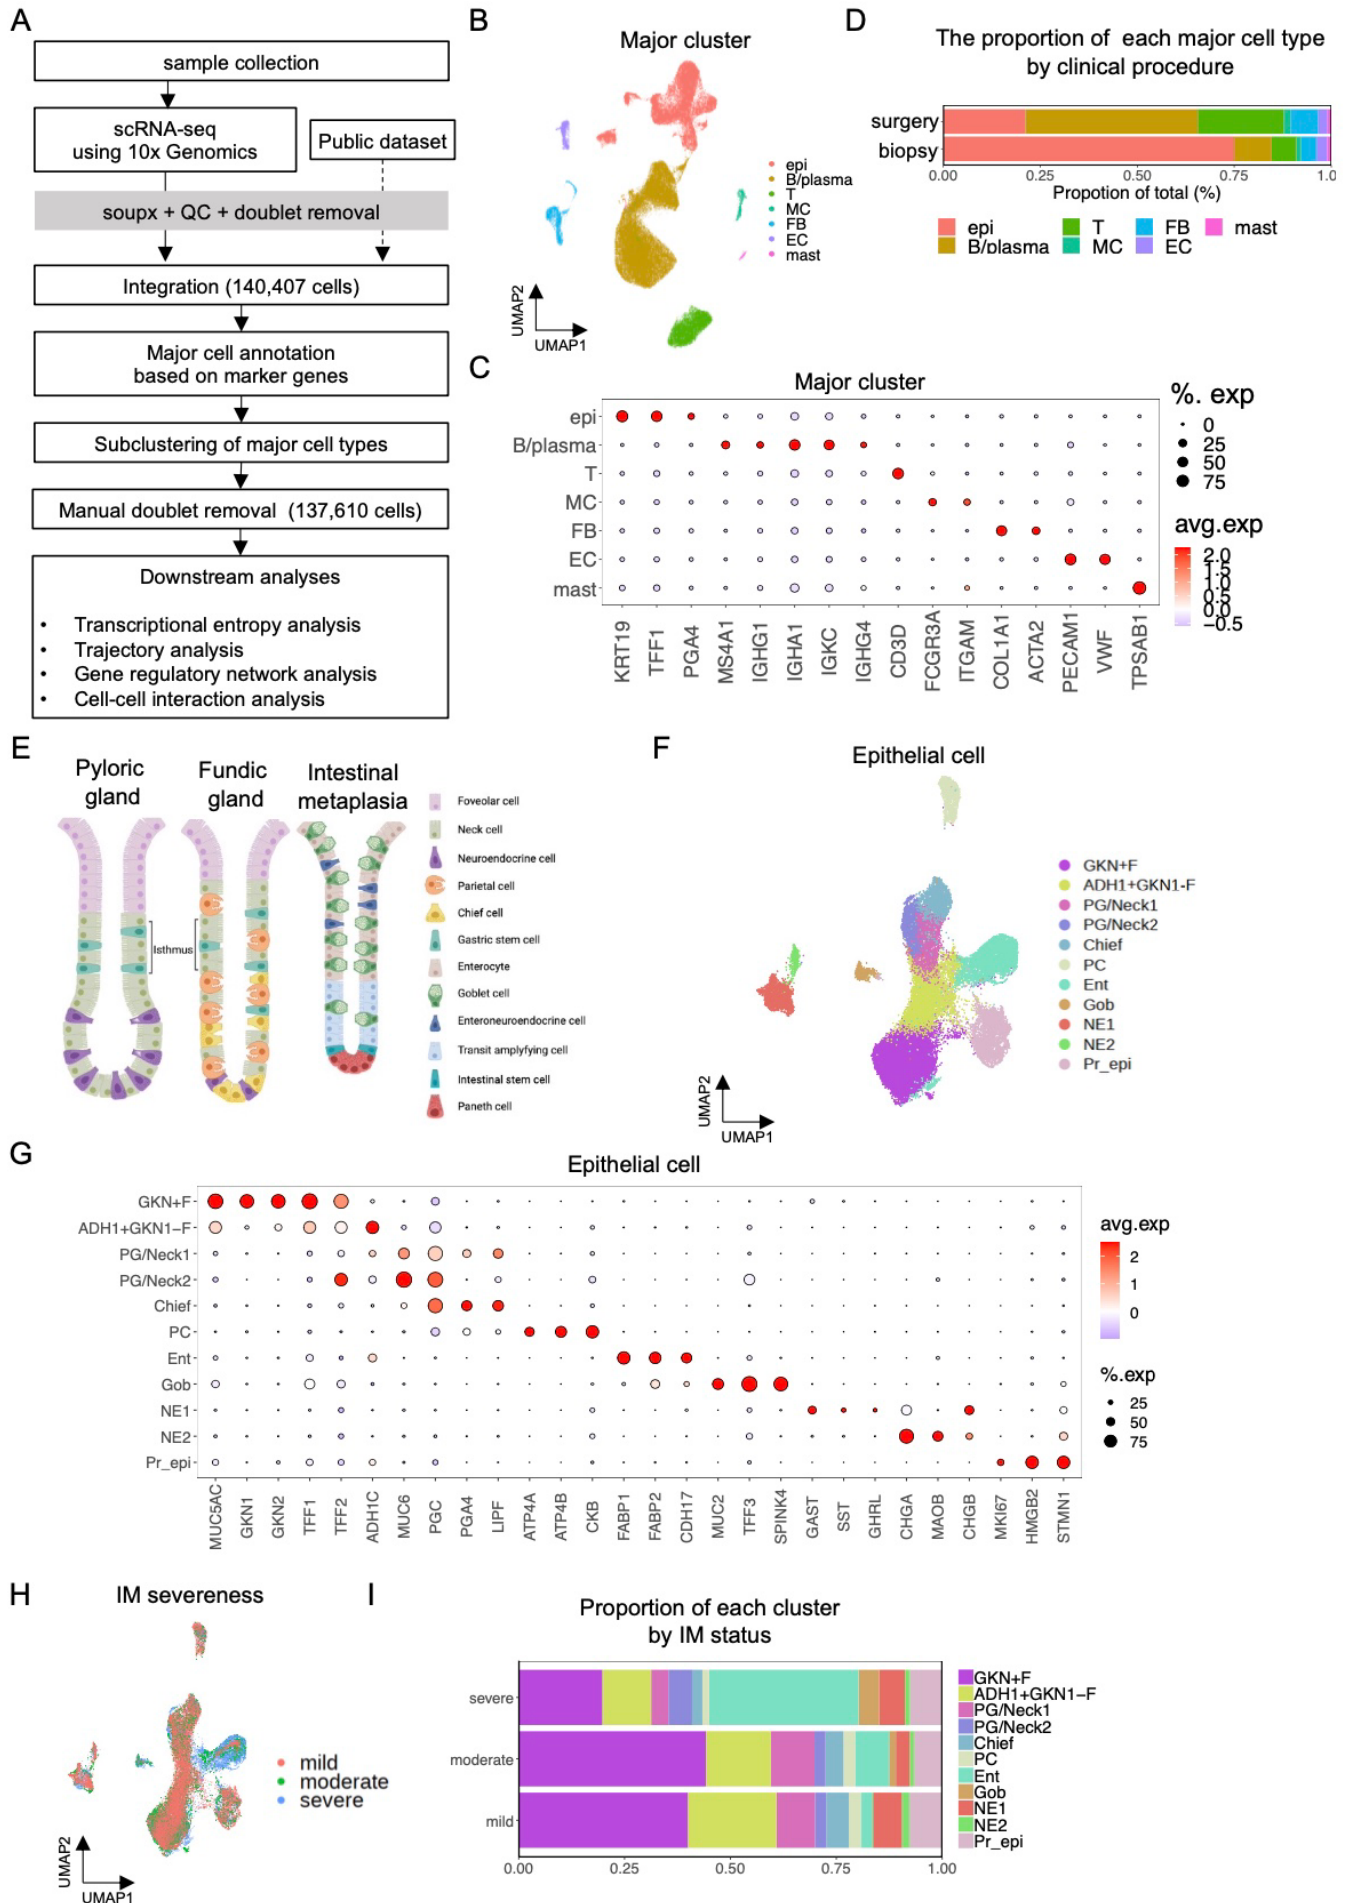

131 **Figure 1. Major cell and epithelial cell clustering in stomach mucosa.**

132 (A) Overview of the comprehensive scRNA-seq analysis workflow.

133 (B) UMAP showing the 7 major cell types identified by scRNA-seq (137,610 cells) of all cells after QC.

134 (C) Representative major cell marker genes. Size and color of circles show the percentage of cells  
135 expressing genes and average gene expression, respectively.

136 (D) Proportion of major cell types according to clinical procedure. Biopsy specimens had larger  
137 proportions of epithelial cells and surgical specimens had a larger proportion of nonepithelial cells.

138 (E) Scheme of each epithelial cell-type in the pyloric gland, fundic gland, and metaplastic mucosa.

139 (F) UMAP showing subclusters of epithelial cells (39,169 cells) identified by scRNA-seq.

140 (G) Representative epithelial cell marker genes. Size and color of circles show the percentage of cells  
141 expressing genes and average gene expression, respectively.

142 (H) UMAP showing the IM state tissue from which each cell was derived. See methods for IM status  
143 determination.

144 (I) Proportion of epithelial cell types according to IM status. IM severe samples had a larger proportion  
145 of goblet and enterocytes.

146 Abbreviations: UMAP, Uniform Manifold Approximation and Projection; QC: quality check; epi:

147 epithelial cells; MC: myeloid cells; FB: fibroblasts; EC: endothelial cells, F: foveolar cells, PG:

148 pyloric gland cells, PC: parietal cells, Ent: enterocytes, Gob: goblet cells, NE: neuroendocrine

149 cells, Pr\_epi: proliferating epithelial cells.

150



151 Foveolar cells, surface mucous cells for which the biological characteristics are known to differ  
152 between gastric and metaplastic mucosa (Kim and Shivdasani, 2016), were clustered into two distinct  
153 populations: GKN1+F cells and ADH1+GKN1-F cells (Figures 1F and 1G; Figure S1A). Encoded by  
154 *GKN1*, gastrokine-1 is a stomach-specific protein with various functions, including modulating cell cycle  
155 progression, cellular proliferation, and antibiotic, anti-inflammation, and antiapoptotic actions  
156 (Alarcón-Millán et al., 2019). Encoded by *ADH1C*, alcohol dehydrogenase 1C is often discussed in the  
157 context of ethanol metabolism (Edenberg and McClintick, 2018); however, the relationships between its  
158 expression and *H. pylori* infection and IM have been investigated previously, and it may be relevant to  
159 the metabolism of retinol acid (Matsumoto et al., 2005). In human stomach specimens, GKN1  
160 expression was observed in gastric mucosa but not in metaplastic mucosa (Figures S1D and S1E);  
161 moreover, the spatial distributions of the distinct GKN1+F and ADH1+GKN1-F populations showed clear  
162 gradation patterns in the superficial and deeper layers, respectively, of the gastric mucosa (Figures S1D  
163 and S1E). Thus, a combination of scRNA-seq analysis and spatial identification of specific populations  
164 confirmed the histological distributions of the distinct foveolar subtypes, consistent with the findings of  
165 previous studies (Mao et al., 2012; Westerlund et al., 2007); moreover, the results suggested that the  
166 ADH1+GKN1-F and GKN+F populations represent immature (deeper layer) and mature (surface layer)  
167 foveolar epithelium, respectively.

168 The transcription factor *NKX6-3* is known to be a distinctive positive modulator of *GKN1*  
169 (Alarcón-Millán et al., 2019), and its expression is specific to the gastric mucosa (Choi et al., 2008). NE  
170 cells showed characteristically higher expression of *NKX6-3*, especially G and D cells (Figures S1A and  
171 S1C). We also found that non-NE cells in the stomach showed various degrees of positivity for *NKX6-3*  
172 (Figure S1A), indicating that *NKX6-3* has a wider range of biological functions in various stomach cells  
173 than was previously expected. Indeed, a previous study showed that *NKX6-3* inactivation in the stomach  
174 led to overexpression of *CDX2* and reduced expression of *SOX2* (Yoon et al., 2015).

175 Gastric fundic glands and PGs are composed of foveolar epithelium, isthmus, and neck cells

176 (Figures 1E and 1F). Using our integrated scRNA-seq dataset, we identified diverse cell populations,  
177 including those of the neck areas of gastric glands, which we termed PG/Neck cells (Figures 1E–G).  
178 Intriguingly, we identified two distinct PG/neck cell populations: PG/Neck1 and PG/Neck2 cells (Figures  
179 1F and 1G). Some PG/Neck2 cells expressed *MUC6* and/or *TFF2*; thus, they included pyloric as well as  
180 fundic mucous gland cells (Wuputra et al., 2021; Zhang et al., 2019). Higher expression of *MUC6* and  
181 *TFF2* is reportedly related to spasmolytic polypeptide-expressing metaplasia (Nam et al., 2010), which is  
182 associated with chronic inflammation and IM of the stomach (Radyk et al., 2018). Consistent with this  
183 notion, the PG/Neck2 population included cells that expressed *CLDN2* and *TFF3*, known markers for  
184 intestinal and goblet cells, respectively (Escaffit et al., 2005; Zhang et al., 2019). Thus, the PG/Neck2  
185 cells apparently include highly diverse cell populations covering the fundic/pyloric and metaplastic  
186 glands. These cells also expressed *AQP5*, *ODAM*, and *PRR4* as differentially expressed markers, all of  
187 which are known salivary gland markers (Hosoi, 2016; Huang et al., 2021), although the underlying  
188 physiological basis of the similarity between the stomach and saliva is unclear. Notably, *AQP5* was  
189 proposed as a gastric stem cell marker in a previous study (Tan et al., 2020).

190

191 **Transcriptional entropy and gene expression trajectory analyses of epithelial cells reveal the**  
192 **LEFTY1+ cell population as a potential stem cell cluster common to the gastric and metaplastic**  
193 **glands**

194 The distinct stem cell populations in the gastric and metaplastic mucosa are yet to be clarified; however,  
195 it is hypothesized that the stem cell compartment exists in the PG/Neck cells among the cellular clusters  
196 identified here (Han et al., 2019; Kim and Shivdasani, 2016). To determine the possible stem cells of the  
197 stomach glands, we performed transcriptional entropy analysis, calculating the stemness score based  
198 on the number of expressed genes per cell (see Methods; Gulati et al., 2020). The stemness score was  
199 considered an indicator of the differentiation states of each cell: higher entropy suggests that the cell is  
200 in a more immature state (Gulati et al., 2020). In our analysis, PG/Neck2 cells had significantly higher

201 stemness scores compared with those of PG/Neck1 cells ( $p < 2.2e-16$ , Figure 2A); therefore, we  
202 hypothesized that the PG/Neck2 cluster contained possible stem cells. To explore the stem cell  
203 populations of the stomach epithelial cells as well as their developmental paths, we performed  
204 unsupervised trajectory analysis (Cao et al., 2019) in which the differentiation dynamics of gene  
205 expression were visualized (Figures 2B–E). This analysis revealed two separated lineages, namely the  
206 normal gastric lineage and the intestinal metaplastic lineage, which were characterized by *SOX2* and  
207 *CDX2* enrichment, respectively (Figures 2B and 2C), consistent with their known functions in the  
208 respective development of the stomach and intestine (Kim and Shivdasani, 2016). Interestingly, we  
209 found a tiny population in PG/Neck2 cells (we termed these “linking cells”) located between the gastric  
210 and intestinal routes (Figure 2D). In the PG/Neck2 population, these distinct cells were thought to be  
211 possible stem cells because expression of the stem-associated markers (e.g., *AQP5*, *LGR5*, *SMOC2*,  
212 *ASCL2*, *TNFRSF19*, *EPHB2*, *CD44*, and *PROM1*; Guo and Frenette, 2014; Jang et al., 2013, 2017; Kim  
213 and Shivdasani, 2016; Tan et al., 2020; Ye et al., 2018) was relatively high (Figures S2A and S2B).  
214 Moreover, pseudotime analysis showed chronological trajectories from the “linking cell” population to  
215 various paths of the stomach epithelia (Figure 2E). Among PG/Neck2 cells, the candidates of specific  
216 markers for “linking” cells were *LEFTY1*, *OLFM4*, and *CLDN4* in differentially expressed genes (Figure  
217 2F). Whereas *OLFM4* and *CLDN4* were expressed not only in linking cells, but in the enterocytes and  
218 goblet cells (Figures S2A and S2B), *LEFTY1* was highly enriched in the “linking” cells (Figure 2G).  
219 *LGR5*, a representative stem cell marker, was also expressed in the “linking” cells (Figure 2G). Above  
220 all, *LEFTY1* was distinguished as a differentially expressed gene in the “linking” cells with possible stem  
221 cell properties.  
222

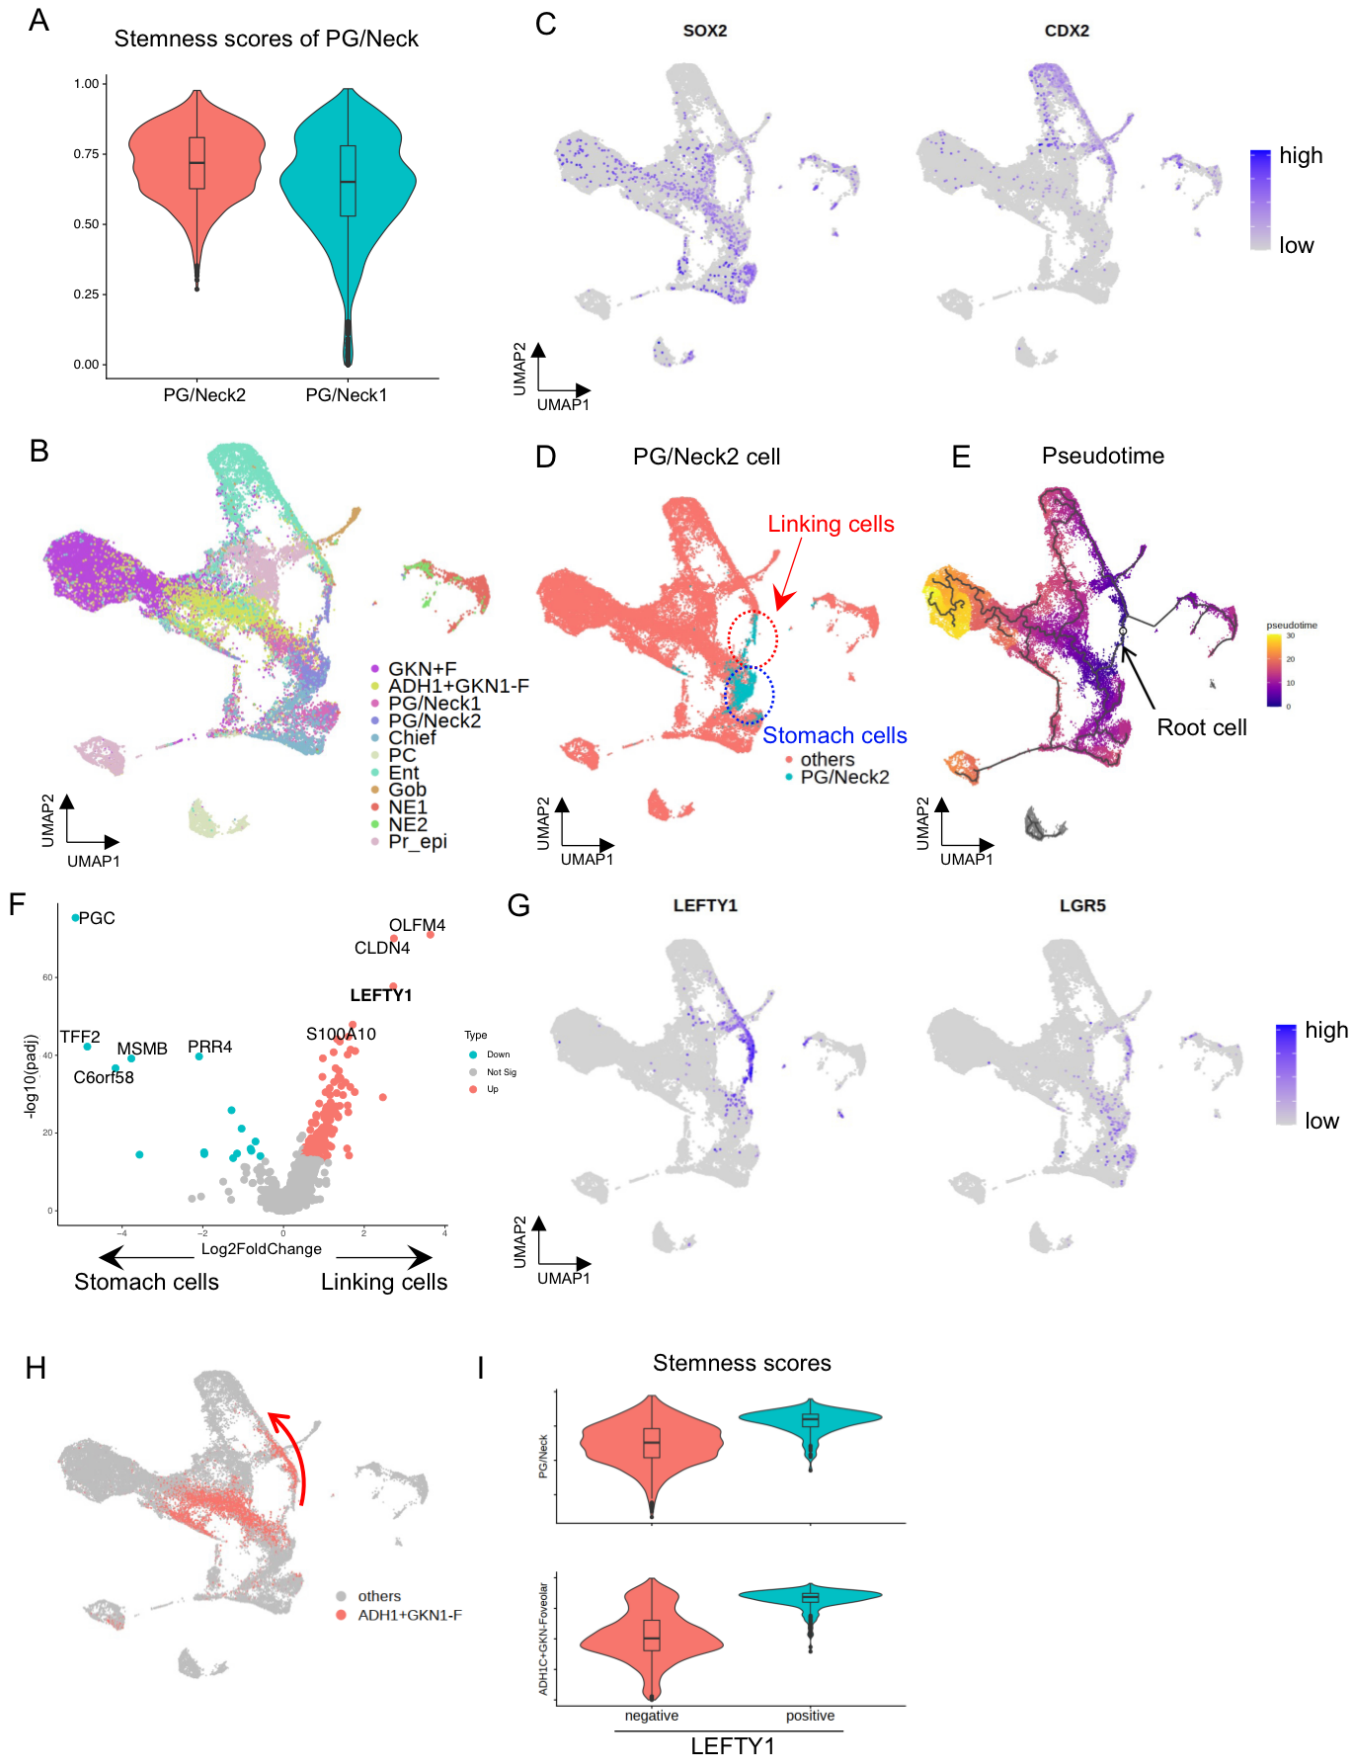

223

224

225 **Figure 2. Trajectory analysis of epithelial cells identified a possible novel stem cell marker,**  
226 **LEFTY1.**

- 227 (A) The comparison of stemness scores between PG/Neck1 and 2. The score of PG/Neck2 is  
228 significantly higher than PG/Neck1 ( $p < 2.2 \times 10^{-16}$ , two-sided Welch's t test).
- 229 (B) UMAP showing each subcluster shown in Figure 1F. UMAP coordinates of epithelial cells was  
230 re-calculated by trajectory inference analysis. See Methods for details.
- 231 (C) *SOX2* and *CDX2* expression (master regulators of the stomach and intestine, respectively) in  
232 epithelial cells. *SOX2* was expressed in the normal gastric cells, whereas *CDX2* was in the  
233 intestinal metaplastic cells.
- 234 (D) UMAP showing two separate groups of PG/Neck2 cells: linking cells, which were located  
235 between the metaplastic and stomach cells, and those within the other stomach cells.
- 236 (E) Pseudotime trajectory analysis displayed on the UMAP plot. It is based on the assumed root cell  
237 (arrow), which was determined manually among LEFTY1+ positive cells.
- 238 (F) Volcano plot showing the top differentially expressed genes between the two PG/Neck2 groups  
239 shown in Figure 2D (linking cells and stomach cells). *OLFM4*, *CLDN4*, and *LEFTY1*, were top  
240 differentially expressed genes in the linking cells.
- 241 (G) *LEFTY1* and *LGR5* expression in epithelial cells. Both genes were expressed in the linking cells.
- 242 (H) ADH1+GKN1-F cells on the UMAP plot. Some ADH1+GKN1-F cells on the routes of metaplastic  
243 lineages (arrow) expressed *LEFTY1* as shown in Figure 2G.
- 244 (I) The comparison of stemness scores between LEFTY1+ and LEFTY1- cells in each PG/Neck2  
245 cell cluster and ADH1+GKN1-F cell cluster. The score of each LEFTY1+ population is significantly  
246 higher than LEFTY1- population ( $p < 2.2 \times 10^{-16}$ , two-sided Welch's t test).

247 Abbreviations: padj, adjusted p-value.

248

249 *LEFTY1*, the product of which is a secreted protein and transforming growth factor-beta (TGF-  
250  $\beta$ ) superfamily member, has been extensively studied in the developmental stage and is known to play a  
251 role in determining left–right asymmetry (Kosaki et al., 1999; Meno et al., 1998). *LEFTY1* inhibits SMAD  
252 signaling by binding to Cripto-1 and blocks Nodal in the development of mice (Tabibzadeh and  
253 Hemmati-Brivanlou, 2006). Additionally, scRNA-seq analysis of Barrett’s esophagus has shown that  
254 *LEFTY1* is a potential marker of Barrett’s esophagus precursors in human (Owen et al., 2018). Zabala et  
255 al. (2020) showed that *LEFTY1* and bone morphogenetic protein (BMP) 7 maintained long-term  
256 proliferation and differentiation of human mammary gland cells, respectively, through a mechanism  
257 whereby *LEFTY1* binds to BMPR2 and prevents BMP7/BMPR2-mediated SMAD activation. In the  
258 present study, some ADH1+GKN1-F cell routes specifically found in the metaplastic lineage also  
259 expressed *LEFTY1* (Figures 2G and 2H). To determine whether *LEFTY1* is an actual marker of stem  
260 cells and investigate their possible roles in the development of stomach mucosa, we divided both  
261 PG/Neck2 and ADH1+GKN1- F cells into two clusters each, i.e., *LEFTY1*<sup>+</sup> and *LEFTY1*<sup>-</sup>, respectively.  
262 First, *LEFTY1*<sup>+</sup> cells showed significantly higher stemness scores in both PG/Neck2 and ADH1+GKN1-  
263 F cell populations ( $p < 2.2 \times 10^{-16}$ , Figure 2I). Pseudotime plotting showed that *LEFTY1* was highly  
264 expressed in cells at the earliest time point and commonly in all types of stomach glands (Figures S2C–  
265 H). Notably, some conventional stemness-associated genes, such as *CD44* and *EPHB2*, were also  
266 expressed in similar time courses to those in which *LEFTY1* was expressed (Figures S2C–E). In the  
267 middle of pseudotime, cell division marker, *MKI67*, were expressed around the “proliferative epithelial”  
268 population (Figures S2C–E). Compared with other conventional stem cell markers or with stem cell- or  
269 cancer stem cell-enriched markers (e.g., *AQP5*, *LGR5*, *SMOC2*, *ASCL2*, *TNFRSF19*, *EPHB2*, *CD44*,  
270 and *PROM1*; Guo and Frenette, 2014; Jang et al., 2013, 2017; Kim and Shivdasani, 2016; Tan et al.,  
271 2020; Ye et al., 2018), *LEFTY1*<sup>+</sup> cells were more highly expressed and specifically existed in a “linking”  
272 cell population (Figure 2G; Figures S2A and S2B). Cell cycle analysis showed that the ratio of G2/M  
273 cells was lowest in *LEFTY1*<sup>+</sup> PG/Neck cells (Figure S2I), which was compatible with their quiescence.

274 IHC showed that LEFTY1+ cells existed in gastric pyloric and fundic glands at very low  
275 frequencies and were spatially located mainly around the so-called isthmus regions (Figure 3A),  
276 consistent with the consideration of the histological isthmus region as a stem cell zone (Figure 1E; Han  
277 et al., 2019; Kim and Shivdasani, 2016). Contrastingly, in the intestinal metaplastic mucosa, LEFTY1+  
278 cells were observed at much higher frequencies and were spatially located at the base of crypts (Figure  
279 3A), consistent with the knowledge that intestinal stem cells reside at crypt bases (Spit et al., 2018).  
280 These spatial data support the hypothesis that *LEFTY1* is a novel marker of gastric stem cells. LEFTY1+  
281 cell frequencies were highest in the metaplastic glands, followed by the PGs and fundic glands,  
282 respectively (Figure 3A). LEFTY1 staining showed two different patterns: a moderate cytoplasmic  
283 staining pattern and an intense dot signal pattern. However, the functional differences, if any, of LEFTY1  
284 in relation to these staining patterns are not clear, as reported previously in an esophageal study (Owen  
285 et al., 2018).

286 We performed RNA *in situ* hybridization (RNA-ISH) of *LEFTY1* and *LGR5* (Figure 3A), finding  
287 that a portion of *LGR5*+ cells coexpressed *LEFTY1* in the pyloric and metaplastic mucosa. Additionally,  
288 scRNA-seq analysis and immunofluorescent staining showed that subsets of the CD44+ and/or  
289 EPHB2+ possible stem cells coexpressed LEFTY1 (Figures 3B–E). In our spatial analysis of human  
290 gastric tissues, the colocalization of LEFTY1 with other stem cell markers and the low frequency of  
291 LEFTY1+ cells among other stem-marker-positive cells strongly suggest that LEFTY1 is an actual  
292 candidate stem cell marker. LEFTY1+ cells can be considered common stem cells in both gastric and  
293 metaplastic glands based on our trajectory and pseudotime analyses; however, we found that EPHB2  
294 was expressed in LEFTY1+ cells in the metaplastic mucosa but not in the normal gastric mucosa  
295 (Figure 3E). We hypothesize that, during IM, a phenotypic change occurs in LEFTY1+ stem cells in the  
296 normal gastric gland and they acquire the distinctive properties of intestinal stem cells by obtaining the  
297 EPHB2+ phenotype.

298

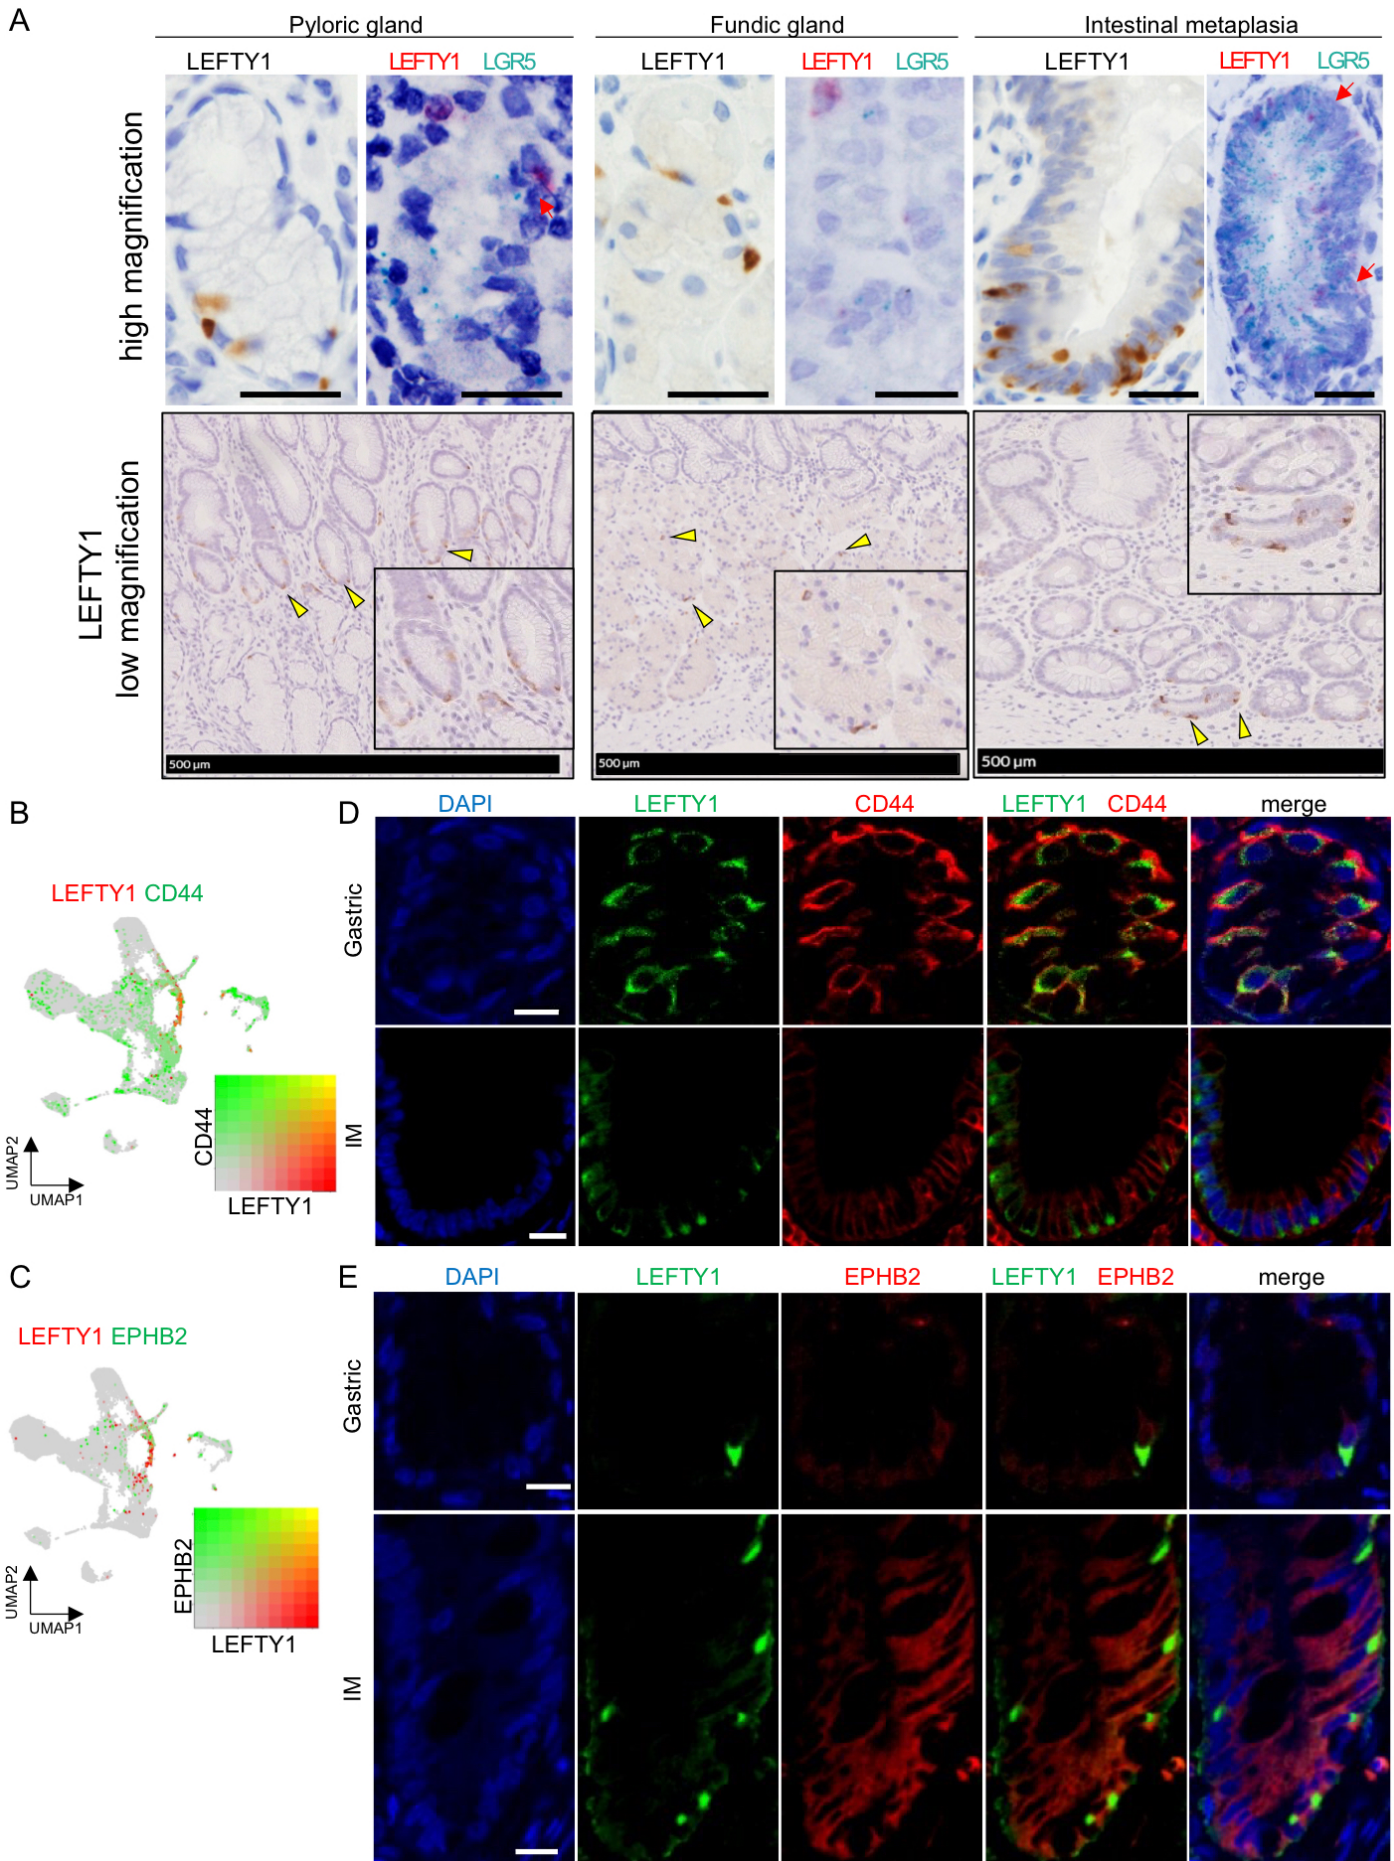

299

300



301 **Figure 3. Coexpression of LEFTY1 and conventional gastrointestinal stem cell marker genes in**  
302 **epithelial cells.**

303 (A) Top: IHC of LEFTY1 (lefthand boxes) and RNA-ISH [righthand boxes: LEFTY1 (red) and LGR5  
304 (green)]. Staining and *in situ* hybridization were performed in pyloric glands, fundic glands, and  
305 intestinal metaplasia (as shown). Some cells coexpressed LEFTY1 and LGR5 (arrows). Scale  
306 bar: 25  $\mu$ m. Bottom: LEFTY1 low magnification of IHC. LEFTY1 expression was observed in the  
307 conventional stem cell zone. Arrowheads: LEFTY1+ cells.

308 (B, C) Combined feature plots showing CD44 and EPHB2 (green) expression with LEFTY1 (red).  
309 Coexpressing cells are shown in yellow.

310 (D, E) Immunofluorescence of LEFTY1 (green) and CD44/EPHB2 (red) in the intestinal metaplasia  
311 and gastric mucosa. (D) Area of clustered LEFTY1+ cells in gastric mucosa was selected for  
312 clarity. Scale bar: 10  $\mu$ m.

313

## 314 **Gene regulatory network analysis of stomach epithelial cells**

315 To investigate the global gene regulatory network in gastric epithelial cells, we analyzed the activity of  
316 transcriptional programs in each epithelial cell-type by integrating the expression of transcription factors  
317 and their downstream target genes (Aibar et al., 2017; Van de Sande et al., 2020). Through gene  
318 regulatory network analysis, we obtained regulon activity scores in each cell-type (Figure 4A; Figure  
319 S3A). Our results were consistent with those of previous studies; for example, NE cells showed high  
320 paired box 6 (PAX6) or achaete-scute family BHLH transcription factor 1 (ASCL1) activities, as reported  
321 previously (Kim and Shivdasani, 2016), parietal cells showed high estrogen-related receptor gamma and  
322 beta activity, which is known to regulate ATP4A and ATP4B (Zhang et al., 2019), and enterocytes  
323 showed high scores for the colon-specific transcription factors CDX1 and CDX2 (Almeida et al., 2003)  
324 (Figure S3A). These results demonstrate the utility of gene regulatory network analysis for correctly  
325 identifying transcription factor activity.

326 Notably, high HOXB13 regulon activity was observed in LEFTY1+ clusters (in both LEFTY1+  
327 PG/Neck and LEFTY1+ ADH+F clusters; Figure 4A). As expected, SOX2 and CDX2 regulon activities  
328 were high in normal and metaplastic mucosa, respectively (Figure 4B), whereas HOXB13 regulon  
329 activity was limited to the possible stem cell region and metaplastic epithelial cells (Figure 4B). Thus, the  
330 HOXB13 regulon might play an important role in the LEFTY1+ cells found in the metaplastic mucosa.  
331 *HOXB13*, the expression of which is almost exclusively found in the prostate and intestine, has been  
332 extensively studied in prostate cancer because both somatic and germline variants of *HOXB13* are  
333 associated with this cancer (Morgan and Pandha, 2017; Yu et al., 2020). *HOXB13* is also known to  
334 downregulate the expression of TCF4 and its target MYC in colon cancer cells (Xie et al., 2019).  
335 Additionally, *HOXB13* expression is higher in left-sided colon cancers than that in right-sided colon  
336 cancers, and this higher expression level is associated with poor prognosis in right-sided colon cancers  
337 (Xie et al., 2019). In gastric cancer, *HOXB13* promotes cell migration and invasion by upregulating  
338 PI3K/AKT/mTOR (Guo et al., 2021).

339 In the present study, IHC revealed high and universal HOXB13 expression in metaplastic  
340 mucosa, including in both complete and incomplete subtypes; however, in normal mucosa, protein  
341 expression was negligible (Figure 4C). These findings suggest that the HOXB13 regulon is  
342 indispensable in the development of IM and that the phenotypic switch of LEFTY1+ possible stem cells  
343 between gastric and metaplastic glands may require additional HOXB13 activation. Unlike in colonic  
344 mucosa, the expression of HOXB13 was not observed in duodenal or iliac mucosa, suggesting that  
345 metaplastic mucosa has similar characteristics to those of colonic mucosa (Figure 4C).

346 Regardless of *LEFTY1* expression, PG/Neck2 cells commonly showed high scores for SOX8  
347 (Figure 4A; Figure S3A), for which an association with stomach biology has not been reported to date;  
348 thus, further investigation of its function in the stomach is warranted. Meanwhile, LEFTY1+ADH+F cells  
349 showed high scores for CDX1 and CDX2 (Figure 4A; Figure S3A), confirming that LEFTY1+ADH+F  
350 cells are on the routes of differentiation of cells destined for the metaplastic lineage (Figure 2H). Fundic  
351 gland-specific cells (i.e., chief and parietal cells) showed high SP5 activity (Figure S3A). Huggins et al.  
352 (2017) reported that SP5 is a WNT target and negatively regulates WNT activity in human pluripotent  
353 stem cells. We confirmed the specific expression of SP5 in fundic glands using RNA-ISH; thus, it  
354 appears to be important in the development and/or maintenance of these glands (Figure 4D; Figure  
355 S3B; see Methods).

356 Fazilaty et al. (2021) used scRNA-seq to show that embryonic enterocyte progenitor genes  
357 were reactivated in the damaged enterocytes of both humans and mice. Given that the stomach and  
358 intestine share common features, the gastric mucosa might also reactivate their progenitor programs  
359 upon epithelial damage. Indeed, we found that metaplastic mucosa expressed *LEFTY1* and *HOXB13*,  
360 both of which are embryonic genes (Kosaki et al., 1999; Ma et al., 2003), at higher levels than those in  
361 normal pyloric or fundic mucosa. Moreover, in our pseudotime analysis, mature metaplastic mucosa  
362 specifically expressed *APOA1*, one of the progenitor genes expressed in damaged colonic mucosa  
363 (Figure 2B; Figure S3C), indicating that metaplastic enterocytes were similar to immature colonic

364 epithelium but not normal mucosa.

365

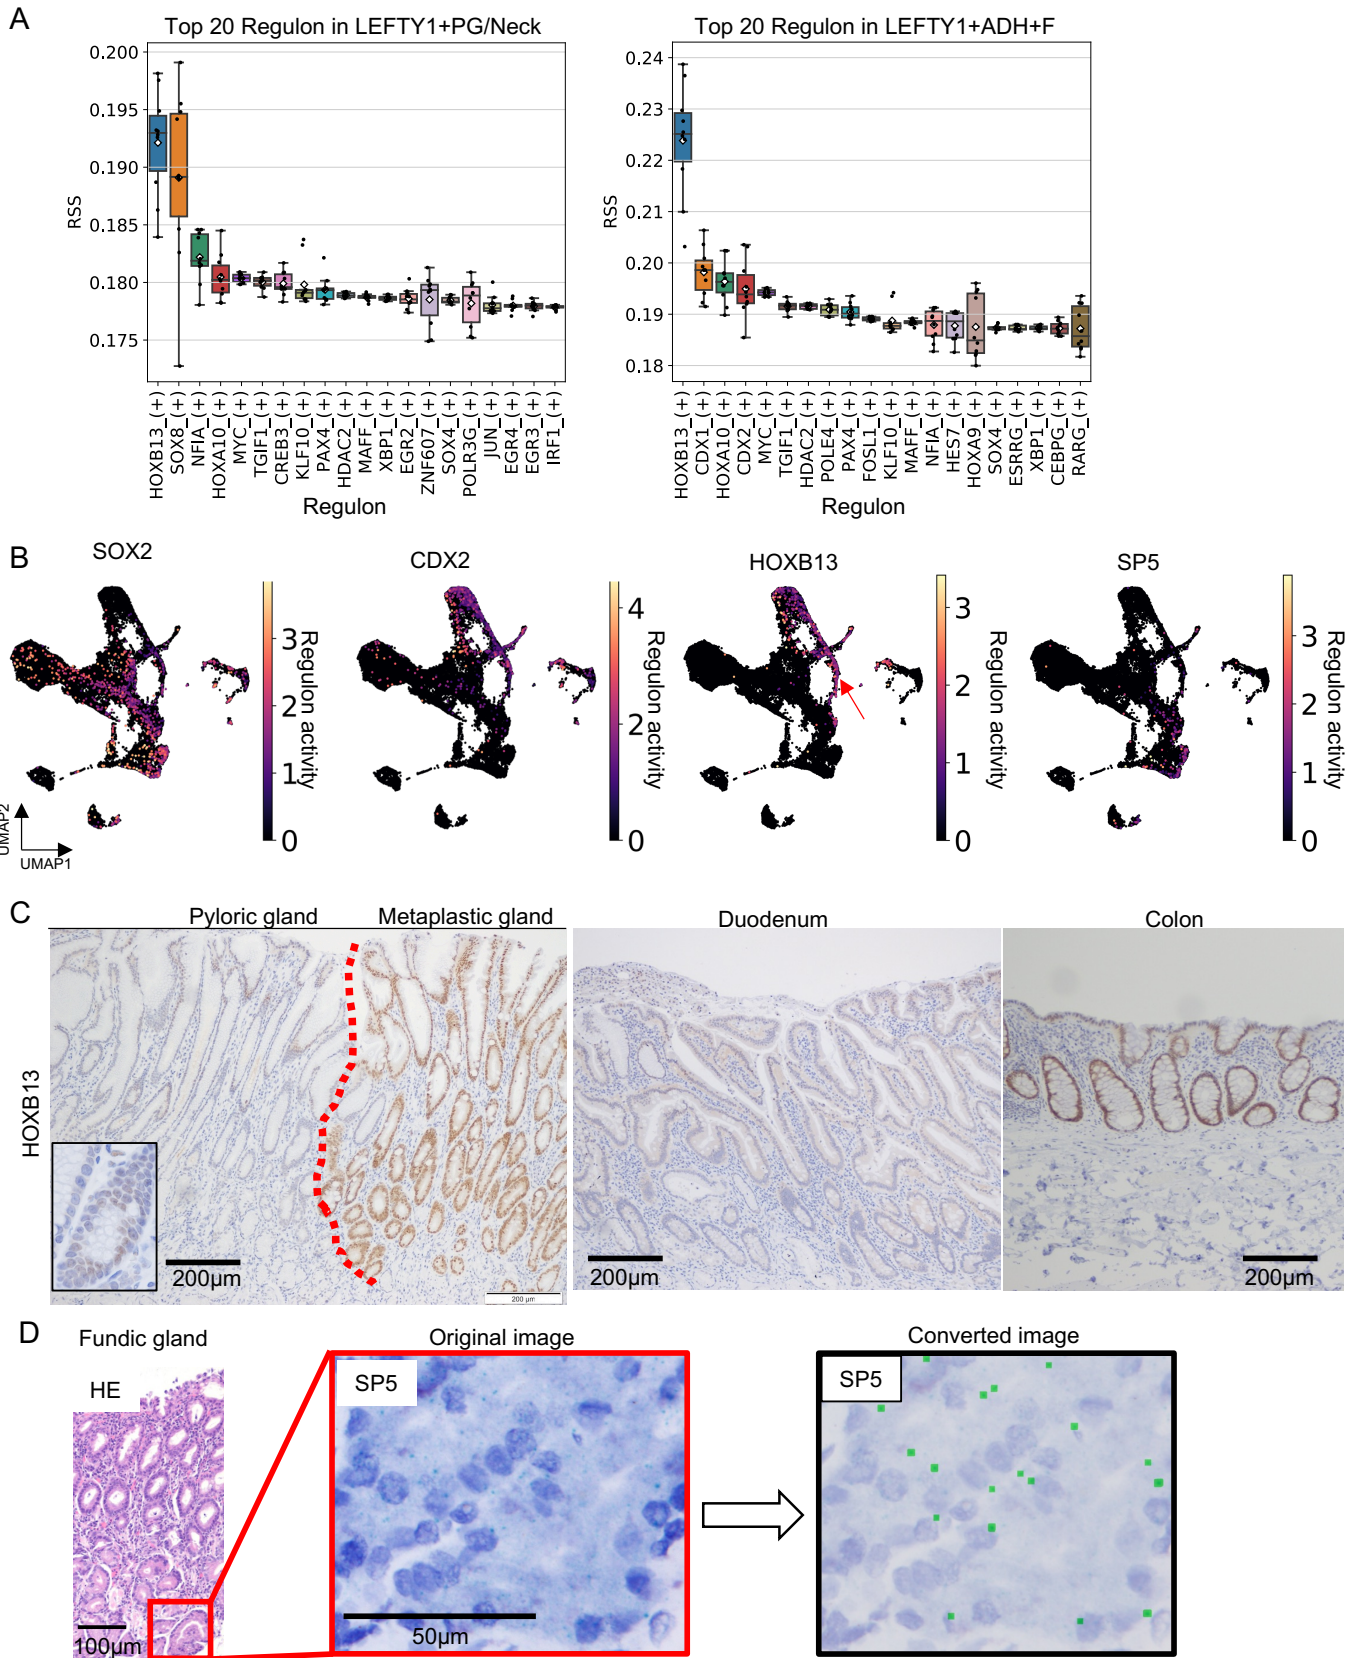

366  
367

368 **Figure 4. Gene regulatory network analysis in epithelial cells revealed LEFTY1+ cell-specific**  
369 **regulons.**

370 (A) LEFTY1+ cluster top 20 regulon specific scores calculated 10 times using pySCENIC. HOXB13  
371 transcription factor showed highest scores commonly. LEFTY1+ADH+F showed relatively high  
372 scores of CDX1 and CDX2, suggesting these cells are on the routes of differentiation of cells  
373 destined for the metaplastic lineage. X-axis shows transcription factors.

374 (B) UMAP plot showing transcription activities of SOX2, CDX2, HOXB13, and SP5. High HOXB13  
375 regulon activity was observed in the LEFTY1+ cell population (arrow) and metaplastic cells.  
376 SOX2, CDX2, and SP5 regulon activity was high in the normal gastric cells, in the fundic gland  
377 specific cells, in the metaplastic lineage cells, respectively.

378 (C) HOXB13 immunohistochemistry in the intestinal metaplasia, stomach, duodenum, and colon.  
379 HOXB13 expression was observed in the metaplastic gland and genuine colonic mucosa. No  
380 expression was observed in the duodenal mucosa. Inset: higher magnification of PG. Scale bar:  
381 200  $\mu\text{m}$ .

382 (D) RNA-ISH showing SP5 expression in the base of the fundic gland. Right: larger green pixels  
383 converted computationally from original green signals (See methods for details).

384

## 385 **Fibroblasts**

386 As concluded by Higuchi et al. (2015), there are distinct differences in the stromal cells of the stomach  
387 and intestinal mucosa; therefore, specific fibroblasts play key roles in maintaining epithelial homeostasis  
388 in specific foci, and gastric fibroblasts are hypothesized to affect the developmental destinations of  
389 gastric or metaplastic epithelia in the stomach. Previous studies on colorectal and gastric glands have  
390 found that the proper compositions of fibroblasts and their secreting cytokines, including WNT, BMP,  
391 and TGF- $\beta$  ligands/inhibitors, were fundamental to the development and maintenance of digestive tissue  
392 integrity (David et al., 2020; Koch, 2017; Wölffling et al., 2021; Zhang et al., 2020). In their scRNA-seq  
393 study of the whole human body, Buechler et al. (2021) showed that various organ-specific fibroblasts  
394 exist. However, global profiling of gastric-specific fibroblasts is lacking; thus, the characteristics of  
395 gastric fibroblasts, as well as their similarities and differences to those in metaplastic mucosa, remain to  
396 be elucidated. In the present study, we identified 5,225 fibroblasts, which were divided into 6  
397 subclusters: KLF+ cells (characteristic expression of *KLF4*, *SFRP1*, *SFRP2*, and *PI16*), CCL11+ cells  
398 (*CCL11*, *ABCA8*, *APOE*, and *ADAM28*), PDGFR+ cells (*PLAT*, *POSTN*, *PDGFRA*, *BMP4*, and *WNT5A*),  
399 FibSmo (Fibroblasts which express both fibroblastic and smooth muscle markers; He et al., 2020)  
400 (*HHIP*, *MYLK*, and *ACTG2*), smooth muscle cells (*RERGL*, *ADIRF*, *MYH11*, and *TAGLN*), and  
401 myofibroblasts (*RGS5* and *CD36*) (Figures 5A and 5B; Figure S4A).

402 We compared our transcription profiling of stomach fibroblasts with that of the intestinal  
403 fibroblasts in the cross-tissue fibroblast atlas (Buechler et al., 2021). Although PDGFRA<sup>hi</sup> fibroblasts  
404 were limited in intestinal tissues in the public database, our scRNA-seq data of stomach fibroblasts  
405 included PDGFR+ fibroblasts (Figure 5B; Figure S4A). These PDGFR+ stomach fibroblasts and the  
406 corresponding PDGFRA<sup>hi</sup> intestinal fibroblasts in the public dataset commonly have specific expression  
407 signatures of, for example, *PDGFRA*, *WNT5A*, and *BMP4*. In addition, the numbers of metaplastic  
408 enterocytes and PDGFR+ fibroblasts were positively correlated in our single-cell dataset (Figure S4B),  
409 suggesting that metaplastic epithelial cell and PDGFR+ fibroblasts interact with each other biologically to

410 maintain the metaplastic intestinal differentiation of the stomach.



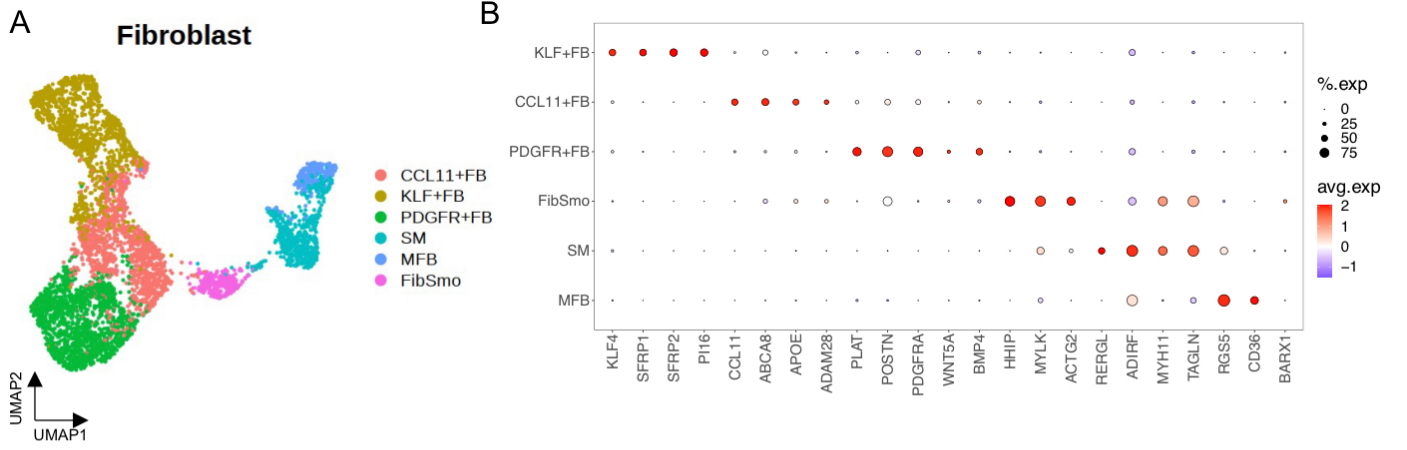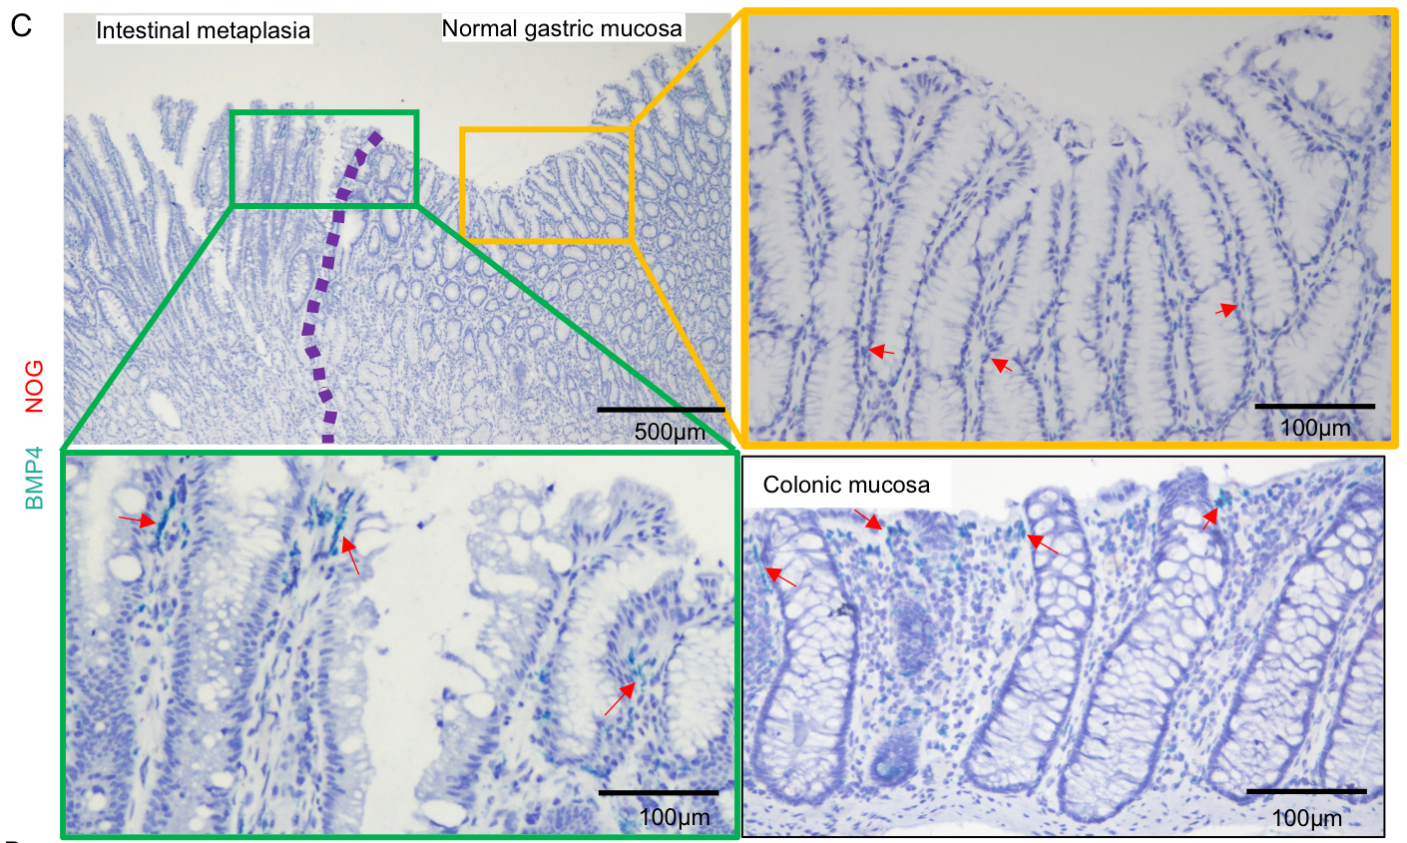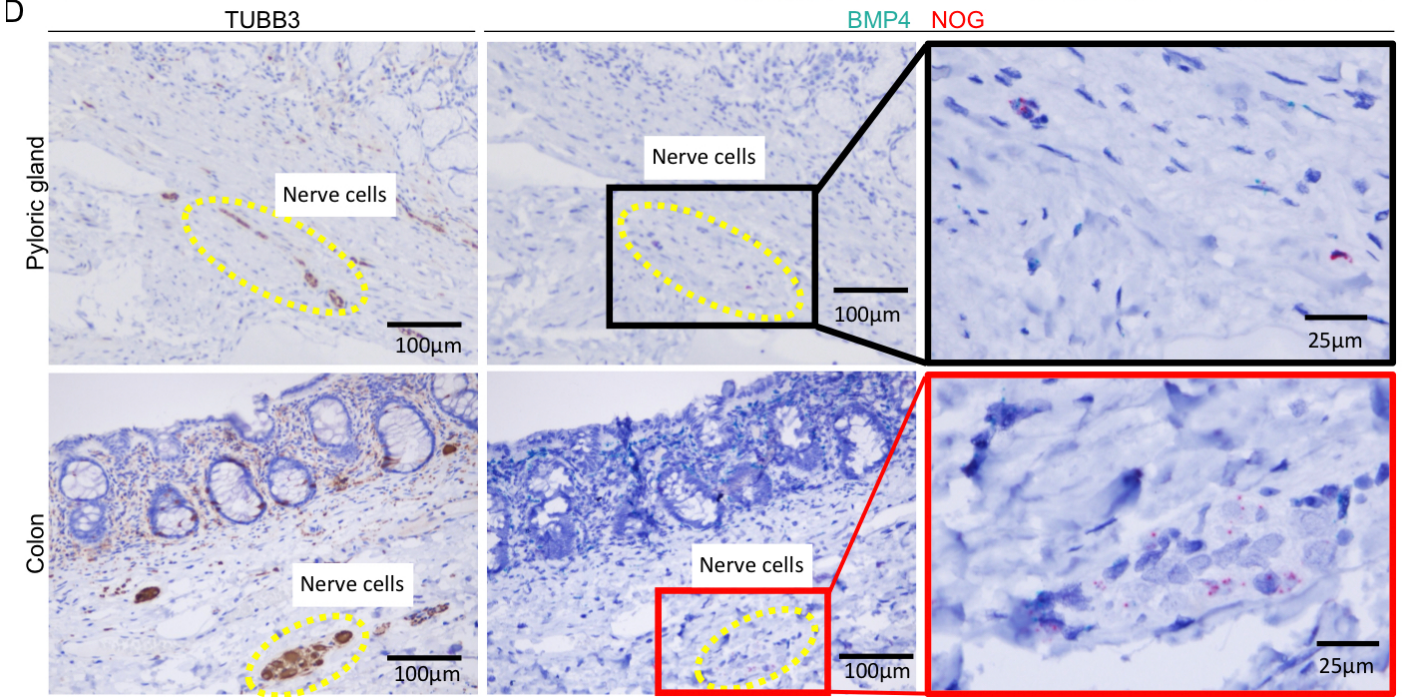

412 **Figure 5. The increase of BMP4 expression in the fibroblasts that precedes the epithelial**  
413 **metaplastic transformation.**

414 (A) UMAP showing the subclusters of 5,225 fibroblasts.

415 (B) Representative marker genes of fibroblast subclusters. Size and colors of circles show the  
416 percentage of cells expressing genes and average gene expression, respectively.

417 (C) RNA-ISH of BMP4. Green contour shows IM and the transitional region; yellow contour shows  
418 the pyloric gland. BMP4 expression in IM and the transitional region was similar to that in  
419 genuine colonic mucosa. The increase of BMP4 expression was observed in the metaplastic  
420 gland and normal gastric mucosa adjacent to IM. No NOG expression was observed in mucosal  
421 lamina propria both in the gastric and colonic mucosa. Arrows: BMP4 signals.

422 (D) Neuronal-specific TUBB3 IHC showing neuron cells in the submucosal region of the pyloric  
423 gland and colonic mucosa (Left). NOG expression was observed in the nerve cells both in the  
424 gastric and colonic mucosa (Right), whereas low BMP4 expression was observed. Yellow circles  
425 show nerve cells and the black contour shows RNA-ISH in high magnification.

426 Abbreviations: FB, fibroblasts; SM: smooth muscle; MFB: myofibroblasts.

427

428

429 To test the aforementioned hypothesis, we conducted RNA-ISH of *BMP4*, one of the signature  
430 genes among the PDGFR+ fibroblasts, and *NOG*, an intrinsic BMP antagonist (Zimmerman et al., 1996).  
431 In intestinal metaplastic mucosa, *BMP4*+ fibroblasts were more frequently discovered surrounding the  
432 metaplastic epithelial cells in the surface areas than in the gastric mucosa (Figure 5C; Figure S4C). The  
433 frequent existence of *BMP4*+ fibroblasts was also detected in normal gastric mucosa adjacent to  
434 metaplasia (Figure 5C; Figure S4C); however, in normal gastric mucosa distant from IM, *BMP4*+  
435 fibroblasts were found infrequently (Figure 5C; Figure S4C). This suggests that composition changes in  
436 the population of specific fibroblasts occur earlier than the epithelial changes over the course of IM. In  
437 our ISH analysis, *BMP4* expression levels of the fibroblasts in the metaplastic mucosa of the stomach  
438 were comparable with those in genuine colonic mucosa (Figure 5C), suggesting that the physiology in  
439 *BMP4*-related tissue homeostasis was similar in metaplastic stomach glands and colorectal crypts,  
440 confirming by 3 stomach specimens including IM gland and 3 colon specimens. Also, we calculated the  
441 ratio of the *BMP4* green signal area of RNA-ISH in the stroma from randomly selected five fields of the  
442 mucosal surface in normal gastric mucosa, transitional mucosa, intestinal metaplastic mucosa, and  
443 colonic mucosa. We found the monotonically increasing of *BMP4* from normal gastric mucosa to  
444 metaplastic and colonic mucosa ( $p= 0.001445$ ; Figure S4D). With these findings, we showed, for the first  
445 time, our hypothesis that the increase of *BMP4* in the fibroblasts precede and may even induce IM.  
446 *NOG* expression was neither obvious in our scRNA-seq analysis nor was it observed in any cells in the  
447 mucosal layers of the stomach (Figure 5C; Figure S4A); however, neuron cell clusters, including  
448 ganglion cells, in submucosal layers expressed *NOG* in the stomach (Figure 5D). Drokhlyansky et al.  
449 (2020) showed that *NOG* is expressed in neuron cells in the colonic submucosa, but we are the first to  
450 report that neuron cells are the intrinsic source of *NOG* in the stomach. A previous study found that  
451 enteric neural crest cells promote antral stomach organoids (Eicher et al., 2022), suggesting the  
452 importance of nerve cells in the development and/or maintenance of epithelial cells. BMP signaling is  
453 known to induce *CDX2* expression in the gastric epithelium (Yoon et al., 2016), and *NOG* is essential for

454 establishing proper gastric organoids (Eicher et al., 2022; Zhang et al., 2020).

455 In our dataset, KLF+ fibroblasts (Figure 5A) characteristically expressed *SFRP1*, *SFRP2*,  
456 *PI16*, and *CD34* (Figure 5B; Figure S4A), but no such fibroblasts existed in the intestine in the public  
457 fibroblast atlas, suggesting that the KLF+ fibroblasts in our dataset are unique to the gastric mucosa.  
458 RNA-ISH of *SFRP1* showed KLF+ fibroblasts existed in the submucosa (Figure S5B). *CD34* is a  
459 stemness-associated marker not only in hematopoietic cells but also in other mesenchymal cells  
460 (Sydney et al., 2014); therefore, KLF+ gastric fibroblasts might have the potential to develop into other  
461 fibroblast clusters. Additionally, KLF+ fibroblasts had the highest stemness score in our analyses (Figure  
462 S4E), suggesting that these cells are tissue-resident fibroblasts with stemness features, which supports  
463 our hypothesis that they have the potential to differentiate into other subtypes.

464 FibSmo cells (He et al., 2020), which express both fibroblastic and smooth muscle markers  
465 (Figure 5B; Figure S4A), are an uncharacterized fraction. They are distributed in the midpoint between  
466 myofibroblasts and other characteristic fibroblasts with signature gene expression, such as that of  
467 *PDGFRA* and *KLF4* (Figure 5A), suggesting that FibSmo cells play a unique role among the fibroblast  
468 lineages. FibSmo cells specifically express high levels of *HHIP* (hedgehog interaction protein; Figure 5B;  
469 Figure S4A), which functions as a regulatory component of the Hedgehog signaling pathway, a pathway  
470 required in the development of the normal stomach in both mice and human (El-Zaatari et al., 2009;  
471 Katoh and Katoh, 2006). We also found that expression of *BARX1*, which encodes a stomach fibroblast-  
472 specific transcription factor, was highest in FibSmo cells (Figure 5B; Figure S4A). Kim et al. (2005)  
473 found that *Barx1*-knockout mice did not develop a normal stomach and that intestinal markers were  
474 activated; therefore, *BARX1*+ stomach fibroblasts may play a key role in normal gastric development.  
475 We performed RNA-ISH to confirm the stomach-specific expression of *BARX1* as well as the  
476 coexpression of *HHIP* in *BARX1*+ fibroblasts, finding that *BARX1* expression in fibroblasts occurred in  
477 the lamina propria of the pyloric and fundic gland mucosa, indicating that *BARX1* interacted with  
478 epithelial cells through its downstream genes (Figure 6A). In contrast, *BARX1*+ fibroblasts were not

479 observed in genuine colonic and small intestinal mucosa (Figure 6A); however, in the intestinal  
480 metaplastic mucosa of the stomach, the frequencies of *BARX1*+ fibroblasts were comparable to those  
481 detected in the gastric mucosa (Figure 6A). We also found clear coexpression of *BARX1* and *HHIP* in  
482 parts of the stomach fibroblasts, although *BARX1* expression was detected more broadly than *HHIP*  
483 expression in fibroblasts (Figure 6A). Based on these findings, we confirm the existence of a unique  
484 subset of stomach-specific fibroblasts, i.e., *BARX1*+/*HHIP*+ FibSmo fibroblasts, which warrant further  
485 functional investigation in relation to the development of the stomach and IM.

486

487

488

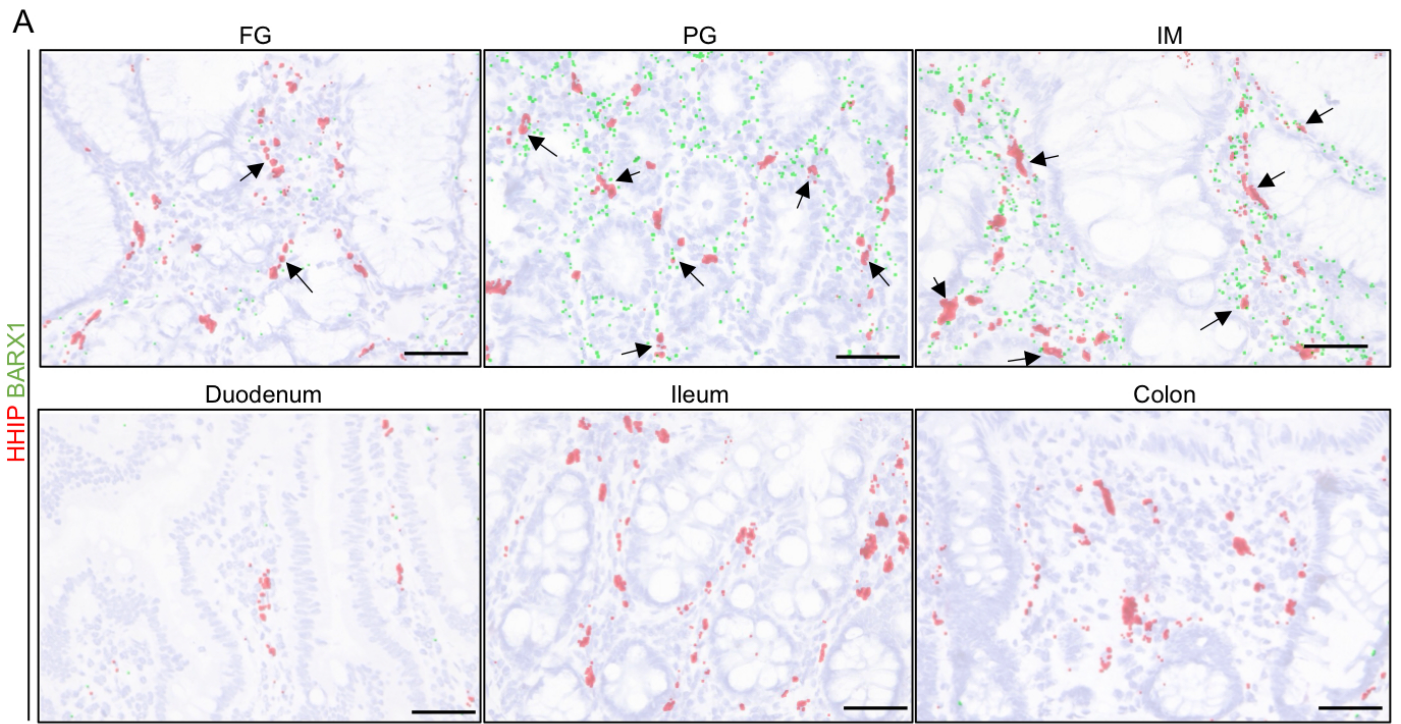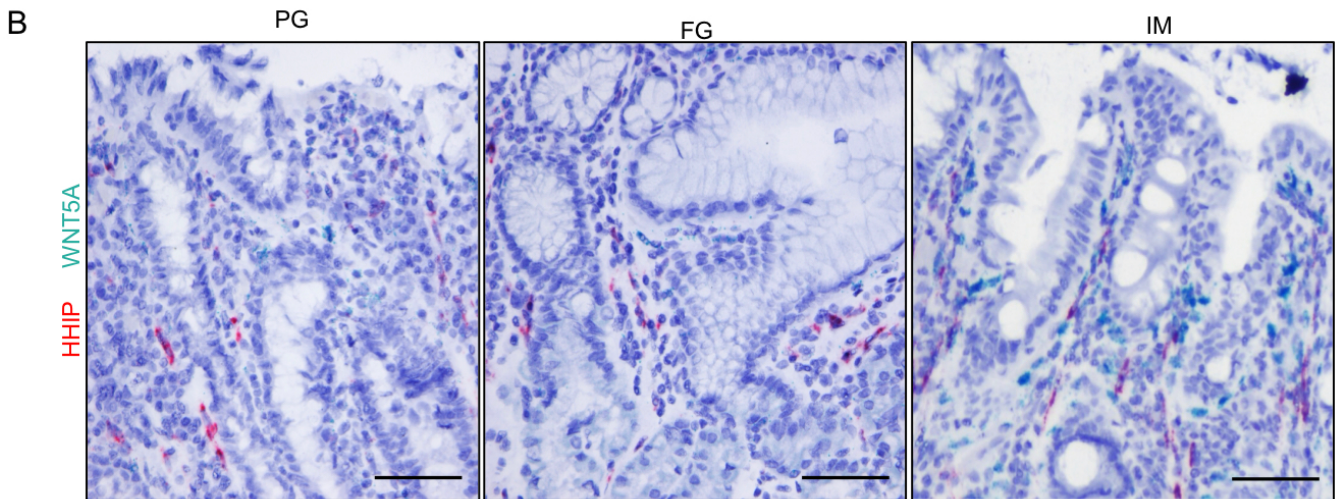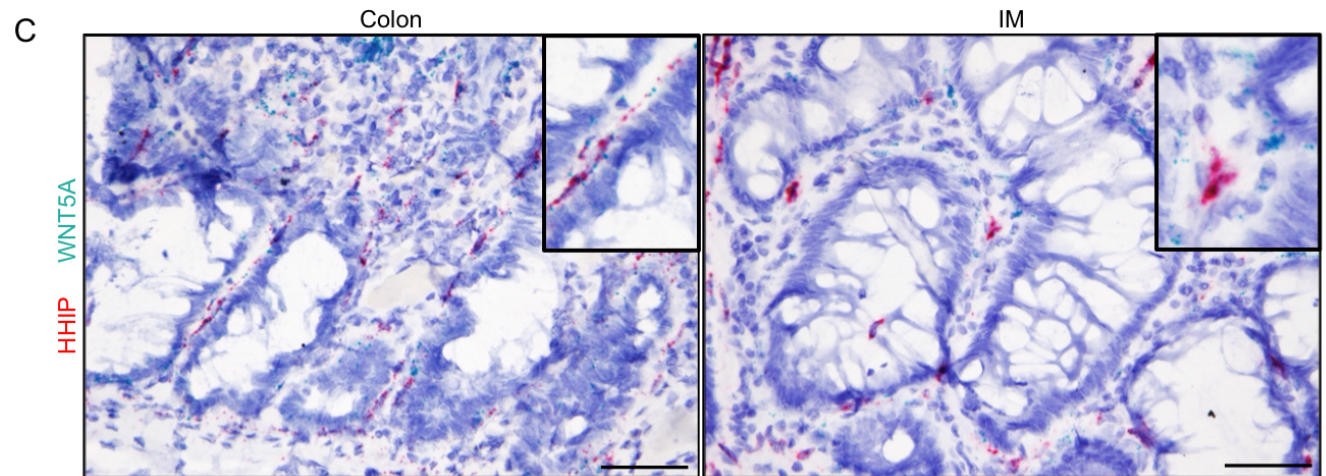

489

490

491 **Figure 6. Unique spatial distribution of BARX1, HHIP, and WNT5A-positive fibroblasts in gastric**  
492 **mucosa.**

493 (A) HHIP and BARX1 RNA-ISH in each gland or tissue. HHIP and BARX1 coexpression was  
494 observed in gastric mucosa including IM (arrows). BARX1 expression was not observed in small  
495 intestinal and colonic mucosa, as expected. BARX1 blue signals and HHIP red signals were  
496 converted to enlarged green and red pixels, respectively, for ease of detection, as explained in  
497 Figure 4D. Arrows: Coexpression of HHIP and BARX1. Scale bar: 50  $\mu\text{m}$ .

498 (B) WNT5A and HHIP RNA-ISH in each tissue. WNT5A was highly expressed in IM relative to its  
499 expression in normal mucosa. WNT5A expression was more observed in the surface area and in  
500 the just behind epithelial cells, whereas HHIP expression was distant from epithelial cell layers.  
501 Scale bar: 50  $\mu\text{m}$ .

502 (C) WNT5A and HHIP RNA-ISH in the colonic mucosa and metaplastic mucosa. WNT5A and HHIP  
503 coexpression was observed in colonic mucosa, whereas not in IM. Inset shows higher  
504 magnification of each region. Scale bar: 50  $\mu\text{m}$ .

505

506 *BARX1* is reported to induce the expression of secreted frizzled-related protein (SFRP), which  
507 promotes differentiation of the stomach epithelium by blocking local WNT signaling during the  
508 developmental stage (Kim et al., 2005). Interestingly, *BARX1* was expressed at measurable levels in all  
509 fibroblast subtypes in our samples, but SFRP expression was mostly limited in the KLF+ fibroblasts  
510 (Figure 5B; Figure S4A). RNA-ISH revealed that SFRP1 and *BARX1* were not coexpressed in stomach  
511 fibroblasts, suggesting that *BARX1* does not induce SFRP1 in the fibroblasts of the adult stomach  
512 (Figure S5A). Additionally, SFRP+ fibroblasts were observed only in the submucosal layer of the  
513 stomach, unlike in the colon mucosa in which SFRP was expressed by fibroblasts in the mucosal layer  
514 (Figures S5B and S5C). Therefore, we might postulate the hypothesis that insufficient WNT inhibition by  
515 SFRPs in intestinal metaplastic mucosa, unlike in normal colorectal mucosa, could be one of possible  
516 causes of unregulated malignant transformation of the metaplastic stomach epithelia.

517 Our scRNA-seq analysis confirmed that some fractions of stomach fibroblasts are sources of  
518 cytokines that regulate WNT or Hedgehog signaling, i.e., the PDGFR+ fibroblasts and FibSmo cells  
519 express *WNT5A*, an inhibitor of canonical WNT signaling, and *HHIP*, respectively (Figure 5B). Several  
520 studies have suggested that the physical distributions of fibroblasts and resultant local cytokine milieu  
521 are vital to the proper development of digestive organs (Ormestad et al., 2006; Roy et al., 2016;  
522 Shinohara et al., 2010). SHH or IHH mutant stomachs show abnormal morphology or expression of  
523 intestinal markers (Thompson et al., 2018); therefore, the pan-Hedgehog inhibitor HHIP has important  
524 functions in the development and homeostasis of the stomach. Thus, we speculate that the spatial  
525 distributions of specific stomach fibroblast subtypes play important roles in the tissue architectures of  
526 gastric and metaplastic mucosa. Our ISH analysis of *WNT5A* in the stomach and colon tissues revealed  
527 that *WNT5A* was expressed in both gastric and metaplastic mucosa, mainly in the surface areas, as  
528 reported previously in relation to colonic mucosa (Gregorieff et al., 2005) (Figures 6B and 6C). *WNT5A*  
529 expression was more intense in the metaplastic regions than in the pyloric or fundic mucosa, consistent  
530 with *BMP4* expression (Figure 6B). *HHIP* expression was also observed broadly in both gastric and



531 metaplastic mucosa; however, in contrast to *WNT5A*, *HHIP*<sup>+</sup> fibroblasts were not limited to the surface  
532 areas but found at broader depths of the stomach mucosa (Figure 6C). Intriguingly, the close lining of  
533 *WNT5A*<sup>+</sup> fibroblasts just behind the epithelial cells was frequently observed throughout the stomach  
534 mucosa (Figure 6B). Conversely, *HHIP*<sup>+</sup> fibroblasts were distributed in stromal spaces at distances from  
535 the epithelial cell layers (Figures 6A and 6B). Therefore, *WNT5A* seems to act locally, i.e., only on the  
536 neighboring epithelial cells, whereas *HHIP* acts more broadly by spreading to distant epithelial cells.  
537 Notably, although *HHIP*<sup>+</sup>/*WNT5A*<sup>+</sup> double-positive fibroblasts were frequently observed in colonic  
538 mucosa, such coexpression of *HHIP* and *WNT5A* was not found among stomach fibroblasts, regardless  
539 of gastric or metaplastic conditions (Figure 6C). In conclusion, although gastric and colonic fibroblasts  
540 share some characteristics, they also harbor their own specific features and probably have distinct  
541 functions.

542 We performed gene regulatory network analysis on the fibroblasts (Figure S5D), finding that  
543 forkhead box transcription factors play a role in their biology. Specifically, *FOXF1*, *FOXF2*, and *FOXL1*  
544 transcription activities were upregulated in *PDGFR*<sup>+</sup> fibroblasts as well as *FibSmo* cells. Correlations  
545 among *FOXF1*, *FOXF2*, and *BMP4* expression and between *FOXL1* and *WNT* expression have been  
546 reported in murine colon fibroblasts (Kaestner, 2019; Ormestad et al., 2006). Therefore, *FOXF1/2*<sup>+</sup> and  
547 *FOXL1*<sup>+</sup> fibroblasts are apparently important for regulating stomach homeostasis and metaplastic  
548 transformation.

549

### 550 **Immune and endothelial cells**

551 We obtained 71,594 B and plasma cells, including 41,544 plasma cells (with characteristic expression of  
552 immunoglobulins, such as *IGHG1*, *IGHA1*, and *IGKC*), 29,816 B cells (*MS4A1* and *HLA-DRA*), and  
553 15,778 T lymphocytes, with 5 subclusters: CD8 T cells (*CD8A* and *CD8B*; including the *GZMK*<sup>+</sup> CD8  
554 subtype), CD4<sup>+</sup>*CTLA4*<sup>+</sup>T cells (*CD4*, *PDCD1*, *CTLA4*, and *FOXP3*), CD4<sup>+</sup>*CD40LG*<sup>+</sup>T cells (*CD4* and  
555 *CD40LG*), and  $\gamma\delta$  T cells (*TRDC* and *TRGC1*) (Figures S6A, S6B, S6E, and S6F). Notably, the

556 proportion of  $\gamma\delta$  T cells was higher in intestinal metaplastic mucosa compared with that in stomach  
557 mucosa (Figure S4B), consistent with the study of Romi et al. (2011), who reported a positive correlation  
558 between the number of  $\gamma\delta$  T cells and *Helicobacter*-associated gastritis. We obtained 2,002 myeloid  
559 cells with clusters of dendritic cells, monocytes/neutrophils, and macrophages (Figures S6C and S6G).  
560 Conventional M1/2 macrophages or CD14/CD16 monocyte clusters were not identified, consistent with  
561 a scRNA-seq atlas of tumor-associated myeloid cells (Cheng et al., 2021), which showed that the  
562 myeloid cells have complex phenotypes rather than classical M1 and M2 phenotypes.

563 In total, 3,028 endothelial cells were identified with 4 subtypes: 1,950 PLVAP+ endothelial  
564 cells, 748 ACKR1+ cells, 243 FN1+ cells (characteristic for *DEPP1*, *FN1*, and *CXCL2*), and 130  
565 lymphatic endothelial cells (*CCL21* and *LYVE1*) (Figures S6D and S6H). FN1+ cells seemed to be  
566 arteries, whereas other endothelial cells were considered venous capillaries based on the expression of  
567 *EFNB2* and *EPHB4* (Kania and Klein, 2016) (Figure S6H). Our IHC analysis showed that ACKR1+  
568 endothelial cells existed in vessels at deeper regions of the stomach mucosa, whereas PLVAP+  
569 endothelial cells constructed vessels in much wider layers of the stomach mucosa, regardless of  
570 fundic/pyloric and metaplastic mucosa (Figures S6I–K).

571

## 572 **Cell–cell communication analysis of epithelial cells and stromal cells**

573 Using scRNA-seq analysis, we identified diverse stomach cells in both the physiological and metaplastic  
574 mucosa. Various signaling interactions between these cells through cytokines, chemokines, and direct  
575 ligand–receptor bindings play important roles in the maintenance of tissue homeostasis in the stomach;  
576 thus, we sought to elucidate the cell–cell communication (CCC) networks to deepen our understanding  
577 of the cellular diversity of the stomach. CCC analysis was performed by combining a gene expression  
578 matrix from our scRNA-seq data with known datasets of ligand–receptor complexes (Jin et al., 2021).  
579 Notably, epithelial cell lineages were one of the most enriched cell types from and to which a great  
580 diversity of CCC was interconnected (Figure 7A). In addition, we found many more interactions were

581 observed among enterocytes, fibroblasts, and myeloid cells in severe IM, compared with nonsevere IM  
582 status (Figures S7A and S7B), suggesting nonepithelial microenvironment contributes development  
583 and/or maintenance of epithelial intestinal metaplasia. From the CCC detected around epithelial cells,  
584 we focused on LEFTY1+ cells as models for investigating the possible mechanisms by which stem cell  
585 properties are maintained (Figure 7A). As shown in Figure S2B, the LEFTY1+ cells also expressed  
586 CD44, another known stem cell marker (Ye et al., 2018). CCC analysis revealed that a signaling  
587 network of macrophage migration inhibitory factor (MIF), a ligand of the CD74+CD44 complex and  
588 CD74+CXCR4 complex (Becker-Herman et al., 2021; Shi et al., 2006), had characteristic features, i.e.,  
589 many of MIF–(CD74+CD44) and MIF–(CD74+CXCR4) interactions are mediated by LEFTY1+ cells  
590 among all the cell types identified in gastric mucosa (Figure 7B). We conclude, therefore, that LEFTY1+  
591 epithelial cells function as a hub of cellular communications via CD44 networks. Given that LEFTY1+  
592 cells also show the highest expression of MIF among epithelial cell types (Figure S8A), CD44, and its  
593 communication networks potentially function in an autocrine manner in these cells. The multilayered  
594 interactions of LEFTY1+ cells with various other cells, including epithelial cell types, support our  
595 hypothesis that LEFTY1+ epithelial cells compose a possible stem cell cluster. CD74 is another  
596 communication partner of CD44, and the CD74–CD44 complex functions to prevent apoptosis and  
597 maintain stem cell properties (Becker-Herman et al., 2021; Gore et al., 2008; Shi et al., 2006). In  
598 contrast to other cell types, we found that a CD44 and CD74 coexpression pattern existed in LEFTY1+  
599 epithelial cells (Figure S8B), providing further evidence that LEFTY1+ possible stem cells function in  
600 concert with the CD44 network.

601 As we reported, PDGFR+ fibroblasts expressing BMP4 and/or WNT5A showed characteristic  
602 properties in the stomach mucosa, specifically in the intestinal metaplastic mucosa. Additionally, a CCC  
603 comparison between severe and nonsevere IM revealed the specific enrichment of NRG signaling in  
604 severe IM (Figures S7A and S7B). We also found that PDGFR+ fibroblasts expressed *NRG1*, the  
605 product of which is neuregulin-1 (NRG1), characteristically (Figure 7C; Figure S8C). In our CCC

606 analysis of the NRG1 network, PDGFR+ fibroblasts interacted with various epithelial cells, including  
607 LEFTY1+PG/Neck cells, LEFTY1+ADH1+F cells, and enterocytes, all of which expressed ERBB3, a  
608 receptor for NRG1 (Meyer and Birchmeier, 1995) (Figure S8D). NRG1–ERBB2/ERBB3 signaling is  
609 known to act against apoptosis to preserve differentiation in human trophoblasts (Fock et al., 2015), and  
610 *NRG1* drives intestinal stem cells to proliferate and regenerate in damaged epithelia (Jardé et al., 2020).  
611 Over the course of IM in the damaged stomach, stomach epithelial cells receive NRG1 signals from  
612 fibroblasts and eventually differentiate into metaplastic enterocytes. Our CCC analysis is consistent with  
613 our spatial distribution analysis of the PDGFR+ fibroblasts (Figures 5C and 6B), i.e., the migration of  
614 PDGFR+ stromal fibroblasts precedes the development of intestinal metaplastic mucosa. Taken  
615 together, our CCC analyses show that PDGFR+ fibroblasts and secreted NRG1 play important roles in  
616 the development of intestinal metaplastic mucosa.

617 Interactions between EPHB2 in LEFTY1+ PG/Neck cells and EFNB2 in various epithelial and  
618 FN1+ endothelial cells were of interest in our CCC analysis (Figure 7D; Figure S8D). Eph–ephrin  
619 complexes have a distinct feature of generating bidirectional signals that affect both Eph-expressing and  
620 ephrin-expressing cells. Eph–ephrin interactions generate repulsive reactions, which play important  
621 roles in the formation of cell clusters and stripe patterns in organogenesis, including in somite and  
622 neuronal differentiation (Kania and Klein, 2016; Pitulescu and Adams, 2010). In murine intestinal  
623 mucosa, stem cells, during their differentiation into proliferation progenitors, gradually lose *Ephb2*  
624 expression, whereas *Efnb2* expression is highest at the villous–crypt boundary (Kania and Klein, 2016).  
625 In our scRNA-seq dataset, surface epithelial cells, such as metaplastic enterocytes and ADH1+GKN1-F  
626 cells, showed the highest levels of *EFNB2* expression (Figures S8D and S8E). Using IHC, we showed  
627 that EPHB2 was only positive in the crypt base of IM, whereas EFNB2 was positive in other regions of  
628 IM and the superficial region of gastric mucosa (Figure S8F). This confirms that the function of Eph–  
629 ephrin repulsion in intestinal metaplastic mucosa is similar to that in colorectal crypts; however, this  
630 interaction was not observed in stomach mucosa. This implies that different combinations of Eph–ephrin

631 interactions or unknown regulation mechanisms might play some roles in stomach glands.

632           Although our CCC analysis did not identify clear enrichment of the major signaling pathways of  
633 BMP or WNT between epithelial cells and fibroblasts, the spatial distribution of WNT5A+ fibroblasts  
634 (Figures 6B and 6C) suggested that interesting cellular interactions possibly occur around WNT/BMP.  
635 According to RNA-ISH analysis, WNT5A+ fibroblasts were mainly found in the surface area of stomach  
636 mucosa (Figures 6B and 6C); however, following closer observations, we found that WNT5A+  
637 fibroblasts were also found in line with LEFTY1+ possible stem cells at the crypt bases of IM (Figure  
638 S8G). This close physical interaction between LEFTY1+ cells and WNT5A+ fibroblasts was specific to  
639 metaplastic mucosa, i.e., it was not detected in pyloric glands (Figure S8G). LEFTY1 functions as a  
640 TGF- $\beta$  inhibitor (Zabala et al., 2020), whereas WNT5A can potentiate as a TGF- $\beta$  signaling to control  
641 stem cell properties and construct regenerative crypts (Miyoshi et al., 2012); thus, LEFTY1 and WNT5A  
642 might work in concert in relation to IM in the stomach. We reported that LEFTY1 IHC revealed two  
643 different protein expression patterns; the intense dot pattern indicates the directional secretion of protein  
644 into the stromal environment, supporting its biological interaction with the local cytokines/receptors  
645 around the stomach gland, such as BMP4 or WNT5A.

646

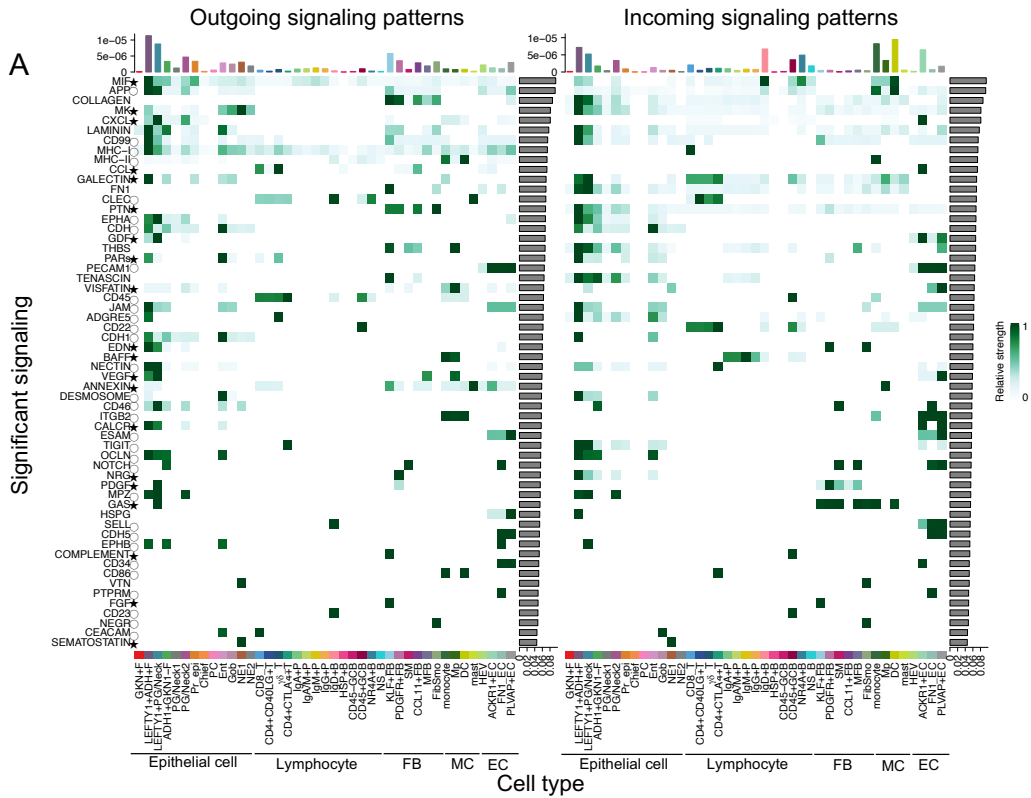

**B** MIF signaling pathway network

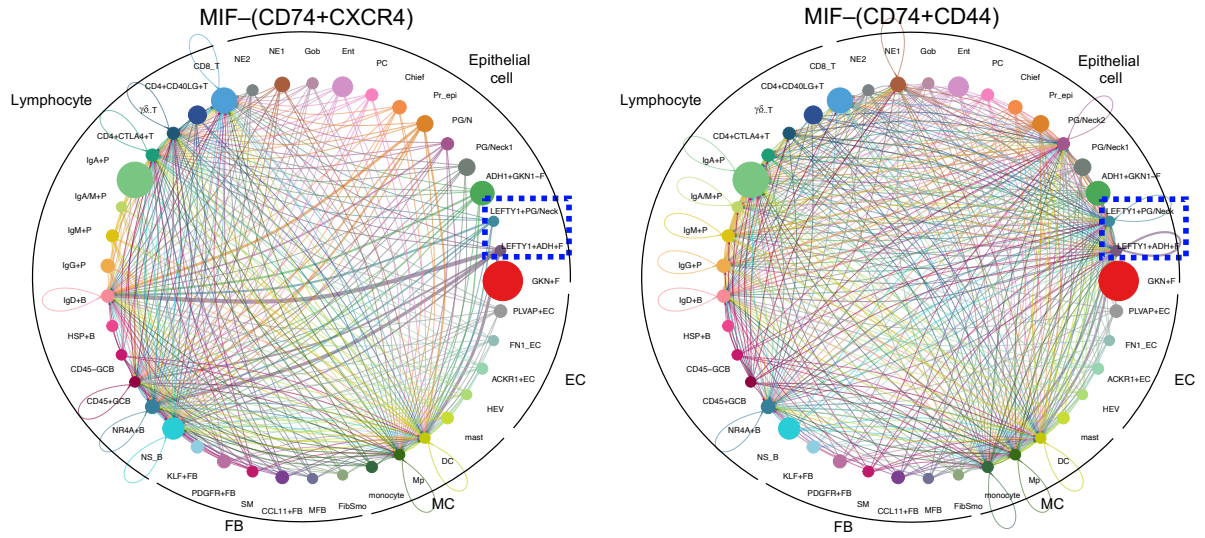

**C** NRG signaling pathway network

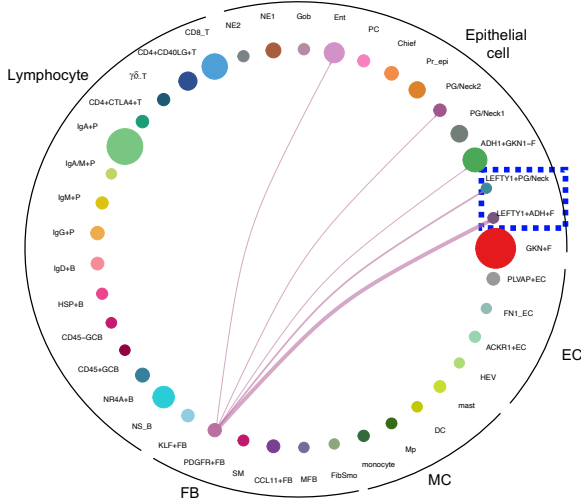

**D** EPHB signaling pathway network

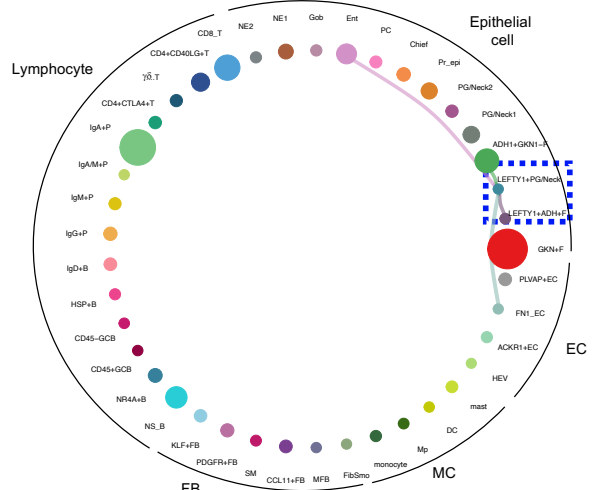

648 **Figure 7. Global view of cell–cell interactions among each cell clusters identified in gastric**  
649 **mucosa, and detailed analysis for focused interactions.**

650 (A) Overview of each cell-type and signaling patterns showing that LEFTY1+ cells were centered in  
651 the communication network. Top bar plots showing the sum of the communication probability  
652 calculated by cellchat library for each cell type. Right bar plots showing the proportion of the  
653 contribution in each signal to the total. Heatmaps showing relative strength for each cell type in  
654 each signaling. \*: secreting signals; O: cell–cell contact; no symbol: extracellular matrix. Jin et al.  
655 (2021) provide the signal ligand and receptor pair details.

656 (B–D) Focused interaction network performed by CCC analysis. The circle size of each cluster  
657 reflects on the number of cells in each cluster. The thickness of the flow indicates the communication  
658 probability. Arrows on outgoing signals and the cluster circles are the same color.

659 (B) Macrophage migration inhibitory factor (MIF) signaling pathway network showing that LEFTY1+  
660 cells expressed both the ligand and receptor. MIF interacts with the CD74+CXCR4 and  
661 CD74+CD44 complexes.

662 (C) Neuregulin (NRG) signaling pathway network showing that PDGFR+FB expressed the ligand,  
663 NRG1, and enterocytes and that its progenitor cells expressed its receptors ERBB2 and ERBB3.

664 (D) EPHB signaling pathway network showing that LEFTY1+PG/Neck expressed EPHB2 and other  
665 mature enterocytes expressed its ligand EFNB2.

666

## 667 **Gene set enrichment analysis of the cells identified via scRNA-seq**

668 To investigate the functional status in each cellular lineage, gene set enrichment analysis was  
669 performed for various cell clusters. Some known gene sets identified by Busslinger et al. (2021) with  
670 parietal, chief, and gastric neck cell properties were clearly enriched in our parietal, chief, and neck cell  
671 populations, respectively, confirming the robustness of our analysis (Figure S9A). Metaplastic  
672 enterocytes and LEFTY1+ cells were enriched with gene sets for adipogenesis, fatty acid metabolism,  
673 glycolysis, oxidative phosphorylation, and reactive oxygen species pathways. Moreover, a gene set of  
674 the MYC pathway “HALLMARK\_MYC\_TARGETS\_V1” was characteristically enriched in LEFTY1+ cells  
675 together with multiple gene sets associated with stem cell properties (Figure S9B). In general, quiescent  
676 stem cells use glycolysis within a hypoxic niche but context-dependently proliferate and differentiate  
677 under other conditions, switching to oxidative phosphorylation (Shyh-Chang and Ng, 2017). The  
678 enrichments of metabolic-related gene features and MYC pathway activation suggest that the LEFTY1+  
679 epithelial population, a cluster of a possible stomach stem cells, has a complex and dedicated metabolic  
680 regulation pathway; thus, additional studies are required to clarify these complex dynamics.

681

## 682 **Hedgehog signal regulation in gastric mucosa**

683 Hedgehog signaling is an important factor that regulates the development and maintenance of  
684 gastrointestinal tracts (Dimmler et al., 2003; Katoh and Katoh, 2006; Thompson et al., 2018), but it was  
685 not a focus of the above-reported analysis. A previous study showed that *SHH* mutant mice exhibited  
686 intestinal transformation of the stomach (Ramalho-Santos et al., 2000). Additionally, recurrent *MALAT1*-  
687 *GLI1* fusion was reported in plexiform fibromyxoma and gastroblastoma, stomach-specific mesenchymal  
688 and mixed epithelial–mesenchymal tumors (Graham et al., 2017), suggesting the importance of  
689 Hedgehog signaling in the stomach, especially mesenchyme. Both SHH and IHH from epithelial cells  
690 are known to activate FOXL1-mediated BMP4 expression in mesenchymal cells (Katoh and Katoh,  
691 2006). In our dataset, SHH expression was limited in gastric lineage, whereas IHH was expressed in



692 both epithelial cells of gastric lineages and metaplastic lineages, respectively (Figure S10A). Although,  
693 to our knowledge, studies are lacking on the differential biological functions of *SHH* and *IHH* in the gut,  
694 *SHH* and *IHH* may function differently during tissue homeostasis of gastric and metaplastic mucosa. The  
695 Hedgehog receptors *PTCH1* and *PTCH2* were expressed occasionally in some PG/Neck1 cells and  
696 PDGFR+ fibroblasts, and the downstream effectors of Hedgehog, *GLI1*, *GLI2*, and *GLI3*, were  
697 expressed modestly in diverse subtypes of epithelial cells and fibroblasts (Figure S10A). Thus,  
698 hedgehog pathways might play important roles in the development and maintenance of stomach  
699 tissues. Of the fibroblasts, both FibSmo and PDGFR+ cells expressed *PTCH1*, whereas only FibSmo  
700 cells expressed *HHIP*, a negative regulator of the hedgehog pathway (Figures S4A and S10A). *PTCH1*  
701 and *HHIP* expression can be induced by a downstream hedgehog signal as a component of negative  
702 feedback machinery (Katoh and Katoh, 2006); thus, at least FibSmo fibroblasts seem to exhibit active  
703 hedgehog pathways, presumably through the receipt of SHH/IHH from epithelial cells. Considering  
704 normal gastric cells and metaplastic enterocytes express *SHH* and *IHH*, respectively, and BMP4  
705 expression is regulated by hedgehog signaling, and BMP4-secreting fibroblasts increase in IM gland, we  
706 assume that both SHH and IHH affect the balance between BMP and hedgehog signaling, but the  
707 suitable ratio of these components may differ between gastric and intestinal metaplastic mucosa. We  
708 hypothesized that, once the balance of hedgehog and BMP signaling in the stomach is disturbed by  
709 chronic inflammation or other stimuli, tissues may experience a perturbed cytokine environment that  
710 induces IM.

711

### 712 **Upregulation of metabolite-related genes in possible stem cells**

713 In addition to our gene set enrichment analysis, other studies have identified the biological links between  
714 stem cell features and the metabolic activity of various pathways (Carey et al., 2015; Cheng et al., 2019;  
715 Tischler et al., 2019). Specifically, Cheng et al. (2019) suggested that HMGCS2 and its metabolite  $\beta$ -  
716 hydroxybutyrate play important roles in maintaining epithelial stemness, inhibiting histone deacetylase

717 (HDAC), and reinforcing NOTCH signaling in the intestine. They also reported that *HMGCS2* is  
718 expressed at higher levels in the *LGR5+* stem cells of the colon. In our dataset, *HMGCS2* and HDACs  
719 (*HDAC1*, *HDAC2*, and *HDAC3*) were clearly enriched in LEFTY1+ cells (Figure S10B), indicating that  
720 these cells are possible stomach stem cells, consistent with the findings of the aforementioned studies.  
721 Moreover, we found that *IDH1* and *IDH2* were enriched in LEFTY1+ cells (Figure S10C).  $\alpha$ -  
722 Ketoglutarate is a well-established metabolite of the IDHs, and intracellular  $\alpha$ -ketoglutarate is known to  
723 maintain the stemness of embryonic stem cells (Carey et al., 2015); thus, the enrichment of IDHs in  
724 LEFTY1+ cells is also indicative of their stemness properties.

725

## 726 **CONCLUSION**

727 In this study, we constructed the largest ever stomach cell atlas at a single-cell resolution. This data  
728 constitutes a unique resource that will be used in a variety of investigations on stomach development  
729 and disease pathology. Combined with sophisticated bioinformatics analyses, we identified a novel  
730 candidate common stem cell population in the adult stomach, i.e., the LEFTY1+ cell cluster, and  
731 uncovered the skewed and characteristic distributions of specific subtypes of fibroblasts in the  
732 ecosystems of normal and metaplastic stomach mucosa. In addition, our CCC analysis revealed that  
733 LEFTY1+ is the most enriched population in both outgoing and incoming signaling patterns, supporting  
734 the hypothesis that the LEFTY1+ population plays a pivotal role in the maintenance of gastric epithelial  
735 integrity. Gene set enrichment analysis and focused metabolic gene expression analyses confirmed and  
736 further suggested the complex dynamics of stem cell metabolism. Overall, our study provides novel and  
737 unexpected findings related to the normal and metaplastic ecosystems of the stomach that warrant  
738 further developmental and cancer research, including the expansion of our dataset with additional  
739 scRNA-seq human cell atlases, such as those of other digestive organs and gastric cancers.

740

## 741 **STAR METHODS**

742 Detailed methods are provided in the online version of this paper and include the following:

743 ● KEY RESOURCES TABLE

744 ● RESOURCE AVAILABILITY

745 ○ Lead contact

746 ● EXPERIMENTAL MODELS AND SUBJECT DETAILS

747 ○ Human specimens

748 ● METHOD DETAILS

749 ○ Single-cell RNA sequencing

750 ○ Data preprocessing for scRNA-seq

751 ○ Clustering, visualization, and cell annotation

752 ○ Annotation of IM status

753 ○ Transcriptional entropy and trajectory analysis

754 ○ Gene regulatory network and cell–cell interaction analysis

755 ○ Hematoxylin and eosin staining

756 ○ Immunohistochemistry

757 ○ RNAScope

758 ○ Signal magnification of RNAScope

759

## 760 **ACKNOWLEDGMENTS**

761 We thank Enago ([www.enago.jp](http://www.enago.jp)) for the English language review. Figure illustrations were created in  
762 part using [Biorender.com](http://Biorender.com). This study was supported by the AMED Practical Research for elucidation of  
763 genomic diversity and identification of clinical intervention for gastric cancers with a focus on humoral  
764 immunity (grant number JP 21cm0106551 to S.I.). This publication is part of the Human Cell Atlas  
765 - [www.humancellatlas.org/publications](http://www.humancellatlas.org/publications).

766

## 767 **AUTHOR CONTRIBUTIONS**

768 Conceptualization, S.I.; Experiments, A.T., H.K., M.K., A.Y., and T.O.; Computational Analysis, D.K. and

769 A.T.; Resources, H.A., Y.S., and T.U.; Writing, A.T., H.K., D.K., M.K., and S.I.; Supervision, S.I.

770

## 771 **REFERENCE**

- 772 1. Aibar, S., González-Blas, C.B., Moerman, T., Huynh-Thu, V.A., Imrichova, H., Hulselmans, G.,  
773 Rambow, F., Marine, J.C., Geurts, P., Aerts, J., et al. (2017). SCENIC: Single-cell regulatory  
774 network inference and clustering. *Nat. Methods* 14, 1083–1086.
- 775 2. Alarcón-Millán, J., Martínez-Carrillo, D.N., Peralta-Zaragoza, O., and Fernández-Tilapa, G. (2019).  
776 Regulation of GKN1 expression in gastric carcinogenesis: A problem to resolve (Review). *Int. J.*  
777 *Oncol.* 55, 555–569.
- 778 3. Almeida, R., Silva, E., Santos-Silva, F., Silberg, D.G., Wang, J., De Bolós, C., and David, L. (2003).  
779 Expression of intestine-specific transcription factors, CDX1 and CDX2, in intestinal metaplasia and  
780 gastric carcinomas. *J. Pathol.* 199, 36–40.
- 781 4. Aran, D., Looney, A.P., Liu, L., Wu, E., Fong, V., Hsu, A., Chak, S., Naikawadi, R.P., Wolters, P.J.,  
782 Abate, A.R., et al. (2019). Reference-based analysis of lung single-cell sequencing reveals a  
783 transitional profibrotic macrophage. *Nat. Immunol.* 20, 163–172.
- 784 5. Bais, A.S., and Kostka, D. (2020). Scds: Computational annotation of doublets in single-cell RNA  
785 sequencing data. *Bioinformatics* 36, 1150–1158.
- 786 6. Becker-Herman, S., Rozenberg, M., Hillel-Karniel, C., Gil-Yarom, N., Kramer, M., Barak, A., Sever,  
787 L., David, K., Radomir, L., Lewinsky, H., et al. (2021). CD74 is a regulator of hematopoietic stem  
788 cell maintenance. *PLoS Biol.* 19, 1–24.
- 789 7. Buechler, M.B., Pradhan, R.N., Krishnamurty, A.T., Cox, C., Calviello, A.K., Wang, A.W., Yang,  
790 Y.A., Tam, L., Caothien, R., Roose-Girma, M., et al. (2021). Cross-tissue organization of the  
791 fibroblast lineage. *Nature* 593, 575–579.
- 792 8. Busslinger, G.A., Weusten, B.L.A., Bogte, A., Begthel, H., Brosens, L.A.A., and Clevers, H. (2021).  
793 Human gastrointestinal epithelia of the esophagus, stomach, and duodenum resolved at single-cell  
794 resolution. *Cell Rep.* 34.

- 795 9. Cao, J., Spielmann, M., Qiu, X., Huang, X., Ibrahim, D.M., Hill, A.J., Zhang, F., Mundlos, S.,  
796 Christiansen, L., Steemers, F.J., et al. (2019). The single-cell transcriptional landscape of  
797 mammalian organogenesis. *Nature* 566, 496–502.
- 798 10. Carey, B.W., Finley, L.W.S., Cross, J.R., Allis, C.D., and Thompson, C.B. (2015). Intracellular  $\alpha$ -  
799 ketoglutarate maintains the pluripotency of embryonic stem cells. *Nature* 518, 413–416.
- 800 11. Cheng, C.-W., Biton, M., Haber, A.L., Gunduz, N., Eng, G., Gaynor, L.T., Tripathi, S., Calibasi-  
801 Kocal, G., Rickelt, S., Butty, V.L., et al. (2019). Ketone Body Signaling Mediates Intestinal Stem Cell  
802 Homeostasis and Adaptation to Diet. *Cell* 178, 1115-1131.e15.
- 803 12. Cheng, S., Li, Z., Gao, R., Xing, B., Gao, Y., Yang, Y., Qin, S., Zhang, L., Ouyang, H., Du, P., et al.  
804 (2021). A pan-cancer single-cell transcriptional atlas of tumor infiltrating myeloid cells. *Cell* 184,  
805 792-809.e23.
- 806 13. Choi, M.Y., Romer, A.I., Wang, Y., Wu, M.P., Ito, S., Leiter, A.B., and Shivdasani, R.A. (2008).  
807 Requirement of the Tissue-Restricted Homeodomain Transcription Factor Nkx6.3 in Differentiation  
808 of Gastrin-Producing G Cells in the Stomach Antrum. *Mol. Cell. Biol.* 28, 3208–3218.
- 809 14. David, M.B., Valenta, T., Fazilaty, H., Hausmann, G., and Basler, K. (2020). Distinct populations of  
810 crypt-associated fibroblasts act as signaling hubs to control colon homeostasis. *PLoS Biol.* 18, 1–  
811 20.
- 812 15. Dimmler, A., Brabletz, T., Hlubek, F., Häfner, M., Rau, T., Kirchner, T., and Faller, G. (2003).  
813 Transcription of Sonic Hedgehog, a Potential Factor for Gastric Morphogenesis and Gastric Mucosa  
814 Maintenance, Is Up-regulated in Acidic Conditions. *Lab. Investig.* 83, 1829–1837.
- 815 16. Drokhlyansky, E., Smillie, C.S., Van Wittenberghe, N., Ericsson, M., Griffin, G.K., Eraslan, G.,  
816 Dionne, D., Cuoco, M.S., Goder-Reiser, M.N., Sharova, T., et al. (2020). The Human and Mouse  
817 Enteric Nervous System at Single-Cell Resolution. *Cell* 182, 1606-1622.e23.
- 818 17. Edenberg, H.J., and McClintick, J.N. (2018). Alcohol Dehydrogenases, Aldehyde Dehydrogenases,  
819 and Alcohol Use Disorders: A Critical Review. *Alcohol. Clin. Exp. Res.* 42, 2281–2297.

- 820 18. Eicher, A.K., Kechele, D.O., Sundaram, N., Zorn, A.M., Helmrich, M.A., Wells, J.M., Eicher, A.K.,  
821 Kechele, D.O., Sundaram, N., Berns, H.M., et al. (2022). Functional human gastrointestinal  
822 organoids can be engineered from three primary germ layers derived separately from pluripotent  
823 stem cells. *Cell Stem Cell* 29, 1–16.
- 824 19. El-Zaatari, M., Saqui-Salces, M., Waghray, M., Todisco, A., and Merchant, J.L. (2009). Sonic  
825 hedgehog in gastric physiology and neoplastic transformation: Friend or foe? *Curr. Opin.*  
826 *Endocrinol. Diabetes Obes.* 16, 60–65.
- 827 20. Escaffit, F., Boudreau, F., and Beaulieu, J.F. (2005). Differential expression of claudin-2 along the  
828 human intestine: Implication of GATA-4 in the maintenance of claudin-2 in differentiating cells. *J.*  
829 *Cell. Physiol.* 203, 15–26.
- 830 21. Fazilaty, H., Brügger, M.D., Valenta, T., Szczerba, B.M., Berkova, L., Doumpas, N., Hausmann, G.,  
831 Scharl, M., and Basler, K. (2021). Tracing colonic embryonic transcriptional profiles and their  
832 reactivation upon intestinal damage. *Cell Rep.* 36.
- 833 22. Finak, G., McDavid, A., Yajima, M., Deng, J., Gersuk, V., Shalek, A.K., Slichter, C.K., Miller, H.W.,  
834 McElrath, M.J., Prlic, M., et al. (2015). MAST: A flexible statistical framework for assessing  
835 transcriptional changes and characterizing heterogeneity in single-cell RNA sequencing data.  
836 *Genome Biol.* 16, 1–13.
- 837 23. Fock, V., Plessl, K., Draxler, P., Otti, G.R., Fiala, C., Knöfler, M., and Pollheimer, J. (2015).  
838 Neuregulin-1-mediated ErbB2-ErbB3 signalling protects human trophoblasts against apoptosis to  
839 preserve differentiation. *J. Cell Sci.* 128, 4306–4316.
- 840 24. Gore, Y., Starlets, D., Maharshak, N., Becker-Herman, S., Kaneyuki, U., Leng, L., Bucala, R., and  
841 Shachar, I. (2008). Macrophage migration inhibitory factor induces B cell survival by activation of a  
842 CD74-CD44 receptor complex. *J. Biol. Chem.* 283, 2784–2792.

- 843 25. Gracz, A.D., Samsa, L.A., Fordham, M.J., Trotier, D.C., Zwarycz, B., Lo, Y.H., Bao, K., Starmer, J.,  
844 Raab, J.R., Shroyer, N.F., et al. (2018). Sox4 Promotes Atoh1-Independent Intestinal Secretory  
845 Differentiation Toward Tuft and Enteroendocrine Fates. *Gastroenterology* 155, 1508-1523.e10.
- 846 26. Graham, R.P., Nair, A.A., Davila, J.I., Jin, L., Jen, J., Sukov, W.R., Wu, T.T., Appelman, H.D.,  
847 Torres-Mora, J., Perry, K.D., et al. (2017). Gastroblastoma harbors a recurrent somatic MALAT1-  
848 GLI1 fusion gene. *Mod. Pathol.* 30, 1443–1452.
- 849 27. Gregorieff, A., Pinto, D., Begthel, H., Destrée, O., Kielman, M., and Clevers, H. (2005). Expression  
850 Pattern of Wnt Signaling Components in the Adult Intestine. *Gastroenterology* 129, 626–638.
- 851 28. Gulati, G.S., Sikandar, S.S., Wesche, D.J., Manjunath, A., Bharadwaj, A., Berger, M.J., Ilagan, F.,  
852 Kuo, A.H., Hsieh, R.W., Cai, S., et al. (2020). Single-cell transcriptional diversity is a hallmark of  
853 developmental potential. *Science.* 367, 405–411.
- 854 29. Gunawardene, A.R., Corfe, B.M., and Staton, C.A. (2011). Classification and functions of  
855 enteroendocrine cells of the lower gastrointestinal tract. *Int. J. Exp. Pathol.* 92, 219–231.
- 856 30. Guo, W., and Frenette, P.S. (2014). Alternative CD44 splicing in intestinal stem cells and  
857 tumorigenesis. *Oncogene* 33, 537–538.
- 858 31. Guo, C., Chu, H., Gong, Z., Zhang, B., Li, C., Chen, J., and Huang, L. (2021). HOXB13 promotes  
859 gastric cancer cell migration and invasion via IGF-1R upregulation and subsequent activation of  
860 PI3K/AKT/mTOR signaling pathway. *Life Sci.* 278, 119522.
- 861 32. Haghverdi, L., Lun, A.T.L., Morgan, M.D., and Marioni, J.C. (2018). Batch effects in single-cell RNA-  
862 sequencing data are corrected by matching mutual nearest neighbors. *Nat. Biotechnol.* 36, 421–  
863 427.
- 864 33. Han, S., Fink, J., Jörg, D.J., Lee, E., Yum, M.K., Chatzeli, L., Merker, S.R., Josserand, M.,  
865 Trendafilova, T., Andersson-Rolf, A., et al. (2019). Defining the Identity and Dynamics of Adult  
866 Gastric Isthmus Stem Cells. *Cell Stem Cell* 25, 342-356.e7.

- 867 34. Hao, Y., Hao, S., Andersen-Nissen, E., Mauck, W.M., Zheng, S., Butler, A., Lee, M.J., Wilk, A.J.,  
868 Darby, C., Zager, M., et al. (2021). Integrated analysis of multimodal single-cell data. *Cell* 184,  
869 3573-3587.e29.
- 870 35. He, S., Wang, L.H., Liu, Y., Li, Y.Q., Chen, H.T., Xu, J.H., Peng, W., Lin, G.W., Wei, P.P., Li, B., et  
871 al. (2020). Single-cell transcriptome profiling of an adult human cell atlas of 15 major organs.  
872 *Genome Biol.* 21, 1–34.
- 873 36. Higuchi, Y., Kojima, M., Ishii, G., Aoyagi, K., Sasaki, H., and Ochiai, A. (2015). Gastrointestinal  
874 fibroblasts have specialized, diverse transcriptional phenotypes: A comprehensive gene expression  
875 analysis of human fibroblasts. *PLoS One* 10, 1–19.
- 876 37. Hosoi, K. (2016). Physiological role of aquaporin 5 in salivary glands. *Pflugers Arch. Eur. J. Physiol.*  
877 468, 519–539.
- 878 38. Huang, N., Pérez, P., Kato, T., Mikami, Y., Okuda, K., Gilmore, R.C., Conde, C.D., Gasmi, B., Stein,  
879 S., Beach, M., et al. (2021). SARS-CoV-2 infection of the oral cavity and saliva. *Nat. Med.* 27, 892–  
880 903.
- 881 39. Huggins, I.J., Bos, T., Gaylord, O., Jessen, C., Lonquich, B., Puranen, A., Richter, J., Rossdam, C.,  
882 Brafman, D., Gaasterland, T., et al. (2017). The WNT target SP5 negatively regulates WNT  
883 transcriptional programs in human pluripotent stem cells. *Nat. Commun.* 8.
- 884 40. Jang, B.G., Lee, B.L., and Kim, W.H. (2013). Distribution of LGR5+ cells and associated  
885 implications during the early stage of gastric tumorigenesis. *PLoS One* 8.
- 886 41. Jang, B.G., Lee, B.L., and Kim, W.H. (2015). Intestinal stem cell markers in the intestinal metaplasia  
887 of stomach and Barrett's esophagus. *PLoS One* 10, 1–13.
- 888 42. Jang, J.W., Song, Y., Kim, S.H., Kim, J., and Seo, H.R. (2017). Potential mechanisms of CD133 in  
889 cancer stem cells. *Life Sci.* 184, 25–29.
- 890 43. Jardé, T., Chan, W.H., Rossello, F.J., Kaur Kahlon, T., Theocharous, M., Kurian Arackal, T., Flores,  
891 T., Giraud, M., Richards, E., Chan, E., et al. (2020). Mesenchymal Niche-Derived Neuregulin-1



- 892 Drives Intestinal Stem Cell Proliferation and Regeneration of Damaged Epithelium. *Cell Stem Cell*  
893 27, 646-662.e7.
- 894 44. Jin, S., Guerrero-Juarez, C.F., Zhang, L., Chang, I., Ramos, R., Kuan, C.H., Myung, P., Plikus, M.  
895 V., and Nie, Q. (2021). Inference and analysis of cell-cell communication using CellChat. *Nat.*  
896 *Commun.* 12, 1–20.
- 897 45. Kaestner, K.H. (2019). The Intestinal Stem Cell Niche: A Central Role for Foxl1-Expressing  
898 Subepithelial Telocytes. *Cmgh* 8, 111–117.
- 899 46. Kania, A., and Klein, R. (2016). Mechanisms of ephrin-Eph signalling in development, physiology  
900 and disease. *Nat. Rev. Mol. Cell Biol.* 17, 240–256.
- 901 47. Katoh, Y., and Katoh, M. (2006). Hedgehog signaling pathway and gastrointestinal stem cell  
902 signaling network (Review). *Int. J. Mol. Med.* 18, 1019–1023.
- 903 48. Kim, T.H., and Shivdasani, R.A. (2016). Stomach development, stem cells and disease. *Dev.* 143,  
904 554–565.
- 905 49. Kim, B.M., Buchner, G., Miletich, I., Sharpe, P.T., and Shivdasani, R.A. (2005). The stomach  
906 mesenchymal transcription factor *barx1* specifies gastric epithelial identity through inhibition of  
907 transient Wnt signaling. *Dev. Cell* 8, 611–622.
- 908 50. Koch, S. (2017). Extrinsic control of Wnt signaling in the intestine. *Differentiation* 97, 1–8.
- 909 51. Korsunsky, I., Millard, N., Fan, J., Slowikowski, K., Zhang, F., Wei, K., Baglaenko, Y., Brenner, M.,  
910 Loh, P. ru, and Raychaudhuri, S. (2019). Fast, sensitive and accurate integration of single-cell data  
911 with Harmony. *Nat. Methods* 16, 1289–1296.
- 912 52. Kosaki, K., Bassi, M.T., Kosaki, R., Lewin, M., Belmont, J., Schauer, G., and Casey, B. (1999).  
913 Characterization and Mutation Analysis of Human LEFTY A and LEFTY B , Homologues of Murine  
914 Genes Implicated in Left-Right Axis Development. *Am. J. Hum. Genet.* 64, 712–721.
- 915 53. Ma, X., Stelnicki, E., Rozenfeld, S., Oda, Y., and Largman, C. (2003). HOXB13 Homeodomain  
916 Protein is Cytoplasmic Throughout Fetal Skin Development. *Dev. Dyn.* 227, 192–202.

- 917 54. Mao, W., Chen, J., Peng, T.L., Yin, X.F., Chen, L.Z., and Chen, M.H. (2012). Downregulation of  
918 gastrokine-1 in gastric cancer tissues and restoration of its expression induced gastric cancer cells  
919 to apoptosis. *J. Exp. Clin. Cancer Res.* 31, 1–10.
- 920 55. Matsumoto, M., Yokoyama, H., Suzuki, H., Shiraishi-Yokoyama, H., and Hibi, T. (2005). Retinoic  
921 acid formation from retinol in the human gastric mucosa: Role of class IV alcohol dehydrogenase  
922 and its relevance to morphological changes. *Am. J. Physiol. - Gastrointest. Liver Physiol.* 289, 429–  
923 433.
- 924 56. Meno, C., Shimono, A., Saijoh, Y., Yashiro, K., Mochida, K., Ohishi, S., Noji, S., Kondoh, H., and  
925 Hamada, H. (1998). Lefty-1 Is Required for Left-Right Determination As a Regulator of Lefty-2 and  
926 Nodal. *Cell* 94, 287–297.
- 927 57. Meyer, D., and Birchmeier, C. (1995). Multiple essential functions of neuregulin in development.  
928 *Nature* 376, 386–390.
- 929 58. Miyoshi, H., Ajima, R., Luo, T. C., Yamaguchi, P. T., and Stappenbeck, S. T. (2012). Wnt5a  
930 Potentiates TGF- $\beta$  Signaling - First LWNR conditioned media. *Science*. 338, 108–113.
- 931 59. Morgan, R., and Pandha, H.S. (2017). HOX transcription factors and the prostate tumor  
932 microenvironment. *J. Cancer Metastasis Treat.* 3, 278.
- 933 60. Nam, K.T., Lee, H., Sousa, J.F., Weis, V.G., O’Neal, R.L., Finke, P.E., Romerogallo, J., Shi, G.,  
934 Mills, J.C., Peek, R.M., et al. (2010). Mature chief cells are cryptic progenitors for metaplasia in the  
935 stomach. *Gastroenterology* 139, 2028-2037.e9.
- 936 61. Nestorowa, S., Hamey, F.K., Pijuan Sala, B., Diamanti, E., Shepherd, M., Laurenti, E., Wilson, N.K.,  
937 Kent, D.G., and Göttgens, B. (2016). A single-cell resolution map of mouse hematopoietic stem and  
938 progenitor cell differentiation. *Blood* 128, e20–e31.
- 939 62. Nie, S., and Yuan, Y. (2020). The Role of Gastric Mucosal Immunity in Gastric Diseases. *J.*  
940 *Immunol. Res.* 2020.

- 941 63. Ormestad, M., Astorga, J., Landgren, H., Wang, T., Johansson, B.R., Miura, N., and Carlsson, P.  
942 (2006). Foxf1 and Foxf2 control murine gut development by limiting mesenchymal Wnt signaling  
943 and promoting extracellular matrix production. *Development* 133, 833–843.
- 944 64. Owen, R.P., White, M.J., Severson, D.T., Braden, B., Bailey, A., Goldin, R., Wang, L.M., Ruiz-Puig,  
945 C., Maynard, N.D., Green, A., et al. (2018). Single cell RNA-seq reveals profound transcriptional  
946 similarity between Barrett’s oesophagus and oesophageal submucosal glands. *Nat. Commun.* 9.
- 947 65. Pitulescu, M.E., and Adams, R.H. (2010). Eph/ephrin molecules - A hub for signaling and  
948 endocytosis. *Genes Dev.* 24, 2480–2492.
- 949 66. Radyk, M.D., Burclaff, J., Willet, S.G., and Mills, J.C. (2018). Metaplastic Cells in the Stomach Arise,  
950 Independently of Stem Cells, via Dedifferentiation or Transdifferentiation of Chief Cells.  
951 *Gastroenterology* 154, 839-843.e2.
- 952 67. Ramalho-santos, M., Melton, D.A., and McMahon, A.P. (2000). Hedgehog signals regulate multiple  
953 aspects of gastrointestinal development. *Development* 127, 2763–2772.
- 954 68. Romi, B., Soldaini, E., Pancotto, L., Castellino, F., del Giudice, G., and Schiavetti, F. (2011).  
955 *Helicobacter pylori* induces activation of human peripheral  $\gamma\delta^+$  T lymphocytes. *PLoS One* 6.
- 956 69. Roy, S.A.B., Allaire, J.M., Ouellet, C., Maloum-Rami, F., Pomerleau, V., Lemieux, É., Babeu, J.P.,  
957 Rousseau, J., Paquet, M., Garde-Granger, P., et al. (2016). Loss of mesenchymal bone  
958 morphogenetic protein signaling leads to development of reactive stroma and initiation of the gastric  
959 neoplastic cascade. *Sci. Rep.* 6, 1–15.
- 960 70. Van de Sande, B., Flerin, C., Davie, K., De Waegeneer, M., Hulselmans, G., Aibar, S., Seurinck, R.,  
961 Saelens, W., Cannoodt, R., Rouchon, Q., et al. (2020). A scalable SCENIC workflow for single-cell  
962 gene regulatory network analysis. *Nat. Protoc.* 15, 2247–2276.
- 963 71. Sathe, A., Grimes, S.M., Lau, B.T., Chen, J., Suarez, C., Huang, R.J., Poultsides, G., and Ji, H.P.  
964 (2020). Single-Cell Genomic Characterization Reveals the Cellular Reprogramming of the Gastric  
965 Tumor Microenvironment. *Clin. Cancer Res.* 26, 2640–2653.

- 966 72. Shi, X., Leng, L., Wang, T., Wang, W., Du, X., Li, J., McDonald, C., Chen, Z., Murphy, J.W., Lolis,  
967 E., et al. (2006). CD44 Is the Signaling Component of the Macrophage Migration Inhibitory Factor-  
968 CD74 Receptor Complex. *Immunity* 25, 595–606.
- 969 73. Shinohara, M., Mao, M., Keeley, T.M., Elzaatari, M., Lee, H., Eaton, K.A., Samuelson, L.C.,  
970 Merchant, J.L., Goldenring, J.R., and Todisco, A. (2010). Bone morphogenetic protein signaling  
971 regulates gastric epithelial cell development and proliferation in mice. *Gastroenterology* 139, 2050-  
972 2060.e2.
- 973 74. Shyh-Chang, N., and Ng, H.H. (2017). The metabolic programming of stem cells. *Genes Dev.* 31,  
974 336–346.
- 975 75. Sidney, L.E., Branch, M.J., Dunphy, S.E., Dua, H.S., and Hopkinson, A. (2014). Concise review:  
976 evidence for CD34 as a common marker for diverse progenitors. *Stem Cells* 32, 1380–1389.
- 977 76. Simmini, S., Bialecka, M., Huch, M., Kester, L., Van De Wetering, M., Sato, T., Beck, F., Van  
978 Oudenaarden, A., Clevers, H., and Deschamps, J. (2014). Transformation of intestinal stem cells  
979 into gastric stem cells on loss of transcription factor Cdx2. *Nat. Commun.* 5, 1–10.
- 980 77. Spit, M., Koo, B.K., and Maurice, M.M. (2018). Tales from the crypt: Intestinal niche signals in tissue  
981 renewal, plasticity and cancer. *Open Biol.* 8.
- 982 78. Stuart, T., Butler, A., Hoffman, P., Hafemeister, C., Papalexi, E., Mauck, W.M., Hao, Y., Stoeckius,  
983 M., Smibert, P., and Satija, R. (2019). Comprehensive Integration of Single-Cell Data. *Cell* 177,  
984 1888-1902.e21.
- 985 79. Tabibzadeh, S., and Hemmati-Brivanlou, A. (2006). Lefty at the Crossroads of “Stemness” and  
986 Differentiative Events . *Stem Cells* 24, 1998–2006.
- 987 80. Tan, S.H., Swathi, Y., Tan, S., Goh, J., Seishima, R., Murakami, K., Oshima, M., Tsuji, T., Phuah,  
988 P., Tan, L.T., et al. (2020). AQP5 enriches for stem cells and cancer origins in the distal stomach.  
989 *Nature* 578, 437–443.

- 990 81. The Tabula Sapiens Consortium (2022). The Tabula Sapiens: A multiple-organ, single-cell  
991 transcriptomic atlas of humans. *Science*. 376.
- 992 82. Thompson, C.A., DeLaForest, A., and Battle, M.A. (2018). Patterning the gastrointestinal epithelium  
993 to confer regional-specific functions. *Dev. Biol.* 435, 97–108.
- 994 83. Tischler, J., Gruhn, W.H., Reid, J., Allgeyer, E., Buettner, F., Marr, C., Theis, F., Simons, B.D.,  
995 Wernisch, L., and Surani, M.A. (2019). Metabolic regulation of pluripotency and germ cell fate  
996 through  $\alpha$ -ketoglutarate. *EMBO J.* 38, 1–15.
- 997 84. Voutilainen, M., Juhola, M., Pitkänen, R., Färkkilä, M., and Sipponen, P. (2002).  
998 Immunohistochemical study of neuroendocrine cells at the gastric cardia mucosa. *J. Clin. Pathol.*  
999 55, 767–769.
- 1000 85. Westerlund, M., Belin, A.C., Felder, M.R., Olson, L., and Galter, D. (2007). High and complementary  
1001 expression patterns of alcohol and aldehyde dehydrogenases in the gastrointestinal tract:  
1002 Implications for Parkinson's disease. *FEBS J.* 274, 1212–1223.
- 1003 86. Wölffling, S., Daddi, A.A., Imai-Matsushima, A., Fritsche, K., Goosmann, C., Traulsen, J., Lisle, R.,  
1004 Schmid, M., Reines-Benassar, M. del M., Pfannkuch, L., et al. (2021). EGF and BMPs Govern  
1005 Differentiation and Patterning in Human Gastric Glands. *Gastroenterology* 161, 623-636.e16.
- 1006 87. Wroblewski, L.E., Peek, R.M., and Wilson, K.T. (2010). *Helicobacter pylori* and gastric cancer:  
1007 Factors that modulate disease risk. *Clin. Microbiol. Rev.* 23, 713–739.
- 1008 88. Wuputra, K., Ku, C.C., Kato, K., Wu, D.C., Saito, S., and Yokoyama, K.K. (2021). Translational  
1009 models of 3-D organoids and cancer stem cells in gastric cancer research. *Stem Cell Res. Ther.* 12,  
1010 1–16.
- 1011 89. Xie, B., Bai, B., Xu, Y., Liu, Y., Lv, Y., Gao, X., Wu, F., Fang, Z., Lou, Y., Pan, H., et al. (2019).  
1012 Tumor-suppressive function and mechanism of HOXB13 in right-sided colon cancer. *Signal*  
1013 *Transduct. Target. Ther.* 4.

- 1014 90. Ye, W., Takabayashi, H., Yang, Y., Mao, M., Hibdon, E.S., Samuelson, L.C., Eaton, K.A., and  
1015 Todisco, A. (2018). Regulation of Gastric Lgr5+ve Cell Homeostasis by Bone Morphogenetic  
1016 Protein (BMP) Signaling and Inflammatory Stimuli. *Cmgh* 5, 523–538.
- 1017 91. Yoon, J.H., Choi, W.S., Kim, O., Choi, S.S., Lee, E.K., Nam, S.W., Lee, J.Y., and Park, W.S. (2015).  
1018 NKX6.3 controls gastric differentiation and tumorigenesis. *Oncotarget* 6, 28425–28439.
- 1019 92. Yoon, J.H., Choi, S.S., Kim, O., Choi, W.S., Park, Y.K., Nam, S.W., Lee, J.Y., and Park, W.S.  
1020 (2016). Inactivation of NKX6.3 in the stomach leads to abnormal expression of CDX2 and SOX2  
1021 required for gastric-to-intestinal transdifferentiation. *Mod. Pathol.* 29, 194–208.
- 1022 93. Young, M.D., and Behjati, S. (2020). SoupX removes ambient RNA contamination from droplet-  
1023 based single-cell RNA sequencing data. *Gigascience* 9, 1–10.
- 1024 94. Yu, M., Zhan, J., and Zhang, H. (2020). HOX family transcription factors: Related signaling  
1025 pathways and post-translational modifications in cancer. *Cell. Signal.* 66, 109469.
- 1026 95. Zabala, M., Lobo, N.A., Antony, J., Heitink, L.S., Gulati, G.S., Lam, J., Parashurama, N., Sanchez,  
1027 K., Adorno, M., Sikandar, S.S., et al. (2020). LEFTY1 Is a Dual-SMAD Inhibitor that Promotes  
1028 Mammary Progenitor Growth and Tumorigenesis. *Cell Stem Cell* 27, 284-299.e8.
- 1029 96. Zhang, M., Liu, Y., and Chen, Y.G. (2020). Generation of 3D human gastrointestinal organoids:  
1030 principle and applications. *Cell Regen.* 9, 1–13.
- 1031 97. Zhang, P., Yang, M., Zhang, Y., Xiao, S., Lai, X., Tan, A., Du, S., and Li, S. (2019). Dissecting the  
1032 Single-Cell Transcriptome Network Underlying Gastric Premalignant Lesions and Early Gastric  
1033 Cancer. *Cell Rep.* 27, 1934-1947.e5.
- 1034 98. Zimmerman, L.B., Jesu, M. De, and Harland, R.M. (1996). The Spemann Organizer Signal noggin  
1035 Binds and Inactivates Bone Morphogenetic Protein 4. 86, 599–606.

1036

1037 **STAR\*METHODS**

1038 **KEY RESOURCES TABLE**

| REAGENT or RESOURCE                   | SOURCE                    | IDENTIFIER                        |
|---------------------------------------|---------------------------|-----------------------------------|
| Antibodies                            |                           |                                   |
| Anti-GKN1 antibody                    | Merck                     | Cat# HPA047684, RRID: AB_2680120  |
| Anti-ADH1C antibody                   | Abcam                     | ab238486                          |
| Anti-ACKR1 antibody                   | Merck                     | Cat# HPA016421, RRID: AB_1849219  |
| Anti-PLVAP antibody                   | Merck                     | Cat# HPA002279, RRID: AB_1079636  |
| CD31 antibody                         | Dako                      | Cat# M0823, RRID: AB_2114471      |
| LEFTY1 rabbit mAb antibody            | Cell Signaling Technology | Cat# 12647, RRID: AB_2797977      |
| Anti-CD44 antibody                    | Abcam                     | Cat# ab16728, RRID: AB_443447     |
| Anti-ephrin B2 antibody               | Abcam                     | Cat# ab131536, RRID: AB_11156896  |
| Human/mouse EPHB2 polyclonal antibody | R&D systems               | Cat# AF467, RRID: AB_355375       |
| Anti-NKX6-3                           | Merck                     | Cat# HPA042790, RRID: AB_10796678 |
| Anti-HOXB13 antibody                  | Abcam                     | Cat# ab201682                     |
| Beta-tubulin antibody                 | Abcam                     | Cat# ab52623, RRID: AB_869991     |
| Biological Samples                    |                           |                                   |
| Human gastric specimen                | This study                | Table S1                          |
| Critical Commercial Assays            |                           |                                   |
| RNAScope Duplex                       | ACD                       | Cat# 322430                       |
| Chromium Controller and the           | 10X Genomics              |                                   |

|                               |                                                     |                                                                                                                                                                                         |
|-------------------------------|-----------------------------------------------------|-----------------------------------------------------------------------------------------------------------------------------------------------------------------------------------------|
| Single-Cell Reagent Kit 3' v2 |                                                     |                                                                                                                                                                                         |
| Deposited Data                |                                                     |                                                                                                                                                                                         |
| Raw and analyzed data         | This study                                          |                                                                                                                                                                                         |
| Stanford                      | (Sathe et al., 2020)                                | dbGAP: phs001818.v1.p1                                                                                                                                                                  |
| Tsinghua                      | (Zhang et al., 2019)                                | GSE134520                                                                                                                                                                               |
| Recombinant DNA               |                                                     |                                                                                                                                                                                         |
| hs-LEFTY1-C2                  | ACD                                                 | Cat No. 415651-C2                                                                                                                                                                       |
| hs-LGR5                       | ACD                                                 | Cat No. 311021                                                                                                                                                                          |
| hs-HHIP-C2                    | ACD                                                 | Cat No. 464811-C2                                                                                                                                                                       |
| hs-SFRP1-C2                   | ACD                                                 | Cat No. 429381-C2                                                                                                                                                                       |
| hs-WNT5A                      | ACD                                                 | Cat No. 604921                                                                                                                                                                          |
| hs-NOG-C2                     | ACD                                                 | Cat No. 416521-C2                                                                                                                                                                       |
| hs-BMP4                       | ACD                                                 | Cat No. 454301                                                                                                                                                                          |
| hs-SP5                        | ACD                                                 | Cat No. 406541                                                                                                                                                                          |
| hs-BARX1                      | ACD                                                 | Cat No. 432981                                                                                                                                                                          |
| Software and Algorithms       |                                                     |                                                                                                                                                                                         |
| Cell Ranger                   | 10X Genomics                                        |                                                                                                                                                                                         |
| Seurat 3.1.5                  | (Stuart et al., 2019)<br>(Hao et al., 2021)         | <a href="https://satijalab.org/seurat/index.html">https://satijalab.org/seurat/index.html</a>                                                                                           |
| Harmony 1.0                   | (Korsunsky et al., 2019)                            | <a href="https://portals.broadinstitute.org/harmony/index.html">https://portals.broadinstitute.org/harmony/index.html</a>                                                               |
| SingleR 1.0.6                 | (Aran et al., 2019)                                 | <a href="https://bioconductor.org/packages/devel/bioc/vignettes/SingleR/inst/doc/SingleR.html">https://bioconductor.org/packages/devel/bioc/vignettes/SingleR/inst/doc/SingleR.html</a> |
| scds 1.1.2                    | (Bais and Kostka, 2020)                             | <a href="https://bioconductor.org/packages/devel/bioc/vignettes/scds/inst/doc/scds.html">https://bioconductor.org/packages/devel/bioc/vignettes/scds/inst/doc/scds.html</a>             |
| CytoTRACE 0.3.3               | (Gulati et al., 2020)                               | <a href="https://cytotrace.stanford.edu/">https://cytotrace.stanford.edu/</a>                                                                                                           |
| monocle3 1.0.0                | (Cao et al., 2019)                                  | <a href="https://cole-trapnell-lab.github.io/monocle3/">https://cole-trapnell-lab.github.io/monocle3/</a>                                                                               |
| pySCENIC 0.11.2               | (Aibar et al., 2017)<br>(Van de Sande et al., 2020) | <a href="https://scenic.aertslab.org/">https://scenic.aertslab.org/</a>                                                                                                                 |
| cellchat 1.1.0                | (Jin et al., 2021)                                  | <a href="http://www.cellchat.org/">http://www.cellchat.org/</a>                                                                                                                         |



1040 **RESOURCE AVAILABILITY**

1041 **Lead contact**

1042 Further information and requests for resources should be directed to and will be fulfilled by the lead  
1043 contact, Shumpei Ishikawa (ishum-prm@m.u-tokyo.ac.jp).

1044 **EXPERIMENTAL MODELS AND SUBJECT DETAILS**

1045 **Materials and methods**

1046 **Human specimens**

1047 This study was approved by the Institutional Review Board of The University of Tokyo and written  
1048 informed consent was obtained from patients. The stomach tissues analyzed in this study were obtained  
1049 from 15 patients who underwent gastrectomy at The University of Tokyo Hospital from 2017 to 2019.  
1050 Fresh specimens of noncancerous stomach tissues were obtained immediately after surgeries and  
1051 subjected to scRNA-seq. Fresh frozen specimens and formalin-fixed and paraffin-embedded (FFPE)  
1052 specimens of the same patients were also preserved for histopathological examination.

1053

1054 **Single-cell RNA sequencing**

1055 For cases #3–12 and #14–18 listed in Table S1, freshly obtained 3–5-mm-sized specimens from normal  
1056 stomach tissues were immediately subjected to scRNA-seq. Specimens were cut into pieces of ~1 mm  
1057 in size and incubated in collagenase/hyaluronidase (STEMCELL Technologies, Canada) diluted with  
1058 Dulbecco's modified Eagle medium [FUJIFILM Wako Pure Chemical Corporation (FUJIFILM), Japan] at  
1059 37°C for 30 min with mild agitation, according to the manufacturer's protocol. Single-cell fractions in the  
1060 incubated specimens were separated using a 40-µm Cell Strainer (CORNING, USA) with additional  
1061 filtration conducted using phosphate-buffered saline (PBS; FUJIFILM). The number of cells obtained in  
1062 single-cell fractions was counted using a hemocytometer (BMS, Japan) following the manufacturer's  
1063 protocol. In total, 10,000 cells were subjected to analysis in a Chromium Controller (10X Genomics,  
1064 USA) following the manufacturer's instructions. A scRNA-seq library was constructed using Chromium

1065 Single-Cell 3' Reagent Kits ver 2 (10X Genomics), after which the quantification and qualification of  
1066 sequencing libraries was performed using an Agilent Bioanalyzer (Agilent Technologies, USA) with a  
1067 High-Sensitivity DNA Kit LabChip (Agilent Technologies).

1068 For cases #7–12 and #14–18, we purified B cell populations used for another experimental  
1069 purpose (not analyzed in the present study) from the residual cell fractions of the above-mentioned  
1070 scRNA-seq experiments. B cell fractions were purified using an EasySep Human CD19 Positive  
1071 Selection Kit II (STEMCELL Technologies) according to the manufacturer's protocol, after which the  
1072 cells were resuspended in PBS (FUJIFILM). The purity of the magnet bead-based cellular purifications  
1073 was considered relatively low; thus, it was considered that a substantial number of mixed cellular  
1074 populations other than B cells were still included in these samples. Therefore, we included the scRNA-  
1075 seq data of these B cell-purified samples in combination with the above-mentioned scRNA-seq only  
1076 when the enriched B cell populations did not affect the purposes and results of our data analyses.  
1077 Thereafter, 10,000 cells were subjected to scRNA-seq using the Chromium Controller (10X Genomics)  
1078 following the manufacturer's instructions. A scRNA-seq library was constructed using Chromium Single-  
1079 Cell V(D)J Reagent Kits (10X Genomics) combined with Chromium Single-Cell 5' Library & Gel Bead  
1080 Kits (10X Genomics), after which the sequencing libraries were quantified and qualified using an Agilent  
1081 Bioanalyzer (Agilent Technologies) with a High-Sensitivity DNA Kit LabChip (Agilent Technologies).

1082 The entire scRNA-seq library was subjected to next-generation sequencing using an Illumina  
1083 NovaSeq platform (Illumina, USA). This sequencing was conducted by iLAC (Ibaraki, Japan).

1084

### 1085 **Data preprocessing for scRNA-seq**

1086 Sequencing data were aligned to human genome GRCh38, and the unique molecular identifiers for  
1087 each cell were counted using Cell Ranger version 3.1 (10X Genomics). Ambient RNA removal was  
1088 performed with SoupX version 1.3.7 (Young and Behjati, 2020) using hemoglobin genes and  
1089 immunoglobulin genes to estimate contamination fractions. Gene expression matrices of Stanford

1090 University and Tsinghua University were downloaded from  
1091 [https://www.ncbi.nlm.nih.gov/projects/gap/cgi-bin/study.cgi?study\\_id=phs001818.v1.p1](https://www.ncbi.nlm.nih.gov/projects/gap/cgi-bin/study.cgi?study_id=phs001818.v1.p1) and  
1092 <https://www.ncbi.nlm.nih.gov/geo/query/acc.cgi?acc=GSE134520>, respectively. All data were then  
1093 merged using Seurat R package version 3.1.5 (Stuart et al., 2019), and the batch effects among the  
1094 samples were removed using Harmony R package version 1.0 (Korsunsky et al., 2019). Cells with low  
1095 quality were then filtered out based on the proportion of mitochondrial gene counts. We used a cell-type  
1096 specific cutoff value based on the following procedure. First, we inferred the cell types using SingleR  
1097 version 1.0.6 (Aran et al., 2019) and reference transcriptomic datasets. We then removed cells with  
1098 >25% mitochondrial genes in the epithelial cell lineage and >15% mitochondrial genes in other cells.  
1099 Finally, we used scds R package version 1.1.2 (Bais and Kostka, 2020) for doublet cell detection.

1100 We applied the “LogNormalize” function that normalized the gene expression of each cell  
1101 according to the total expression, multiplied this by a scale factor 10,000, and log-transformed the result  
1102 using the NormalizeData() function in Seurat.

1103

#### 1104 **Clustering, visualization, and cell annotation**

1105 Principal components were calculated based on the normalized gene expression profiles. The number  
1106 of principal components was determined using a Jackstraw plot, the p-value thresholds of which were  
1107 0.05. tSNE and UMAP dimensionality reduction was performed using the Seurat functions “RunTSNE”  
1108 and “RunUMAP,” respectively. Cell clusters were identified using the “FindClusters” function in Seurat.  
1109 Differentially expressed genes were obtained using the “FindAllMarkers” function via MAST (Finak et al.,  
1110 2015) with the number of genes detected in each cell used as a latent variable. The cell cycle phases for  
1111 each cell were estimated based on the gene expression of cell cycle marker genes (Nestorowa et al.,  
1112 2016).

1113

#### 1114 **Annotation of IM status**

1115 In our dataset, IM status was determined based on histology by experienced pathologists. For the  
1116 Tsinghua University dataset, because IM status was already annotated by the authors, we used the  
1117 existing annotations. For the Stanford University dataset, we calculated the percentage of intestinal cells  
1118 in all epithelial cells for each sample, and the IM status was estimated by comparing this percentage  
1119 with those of the Tsinghua University dataset and our own dataset.

1120

### 1121 **Transcriptional entropy and trajectory analysis**

1122 Using the count data of scRNA-seq and cell-type annotations from Seurat as input, CytoTRACE (Gulati  
1123 et al., 2020) analysis was conducted to calculate transcriptional entropy. Trajectory analysis was  
1124 performed using monocle3 (Cao et al., 2019) with the same input as that used in CytoTRACE. In  
1125 monocle3, batch effect removal was conducted using a function implemented in the software (Haghverdi  
1126 et al., 2018).

1127

### 1128 **Gene regulatory network and cell–cell communication analysis**

1129 The gene regulatory networks for epithelial and fibroblast cells were inferred using the SCENIC and  
1130 pySCENIC pipelines (Aibar et al., 2017; Van de Sande et al., 2020). To confirm reproducibility, gene  
1131 regulatory network analysis was performed 10 times. The Seurat object with cell-type annotation data  
1132 was converted to a loom object using the loomR library to generate input data for SCENIC. CCC  
1133 analysis was conducted using Cellchat (Jin et al., 2021) with count data and cell-type annotations used  
1134 as input data.

1135

### 1136 **Hematoxylin and eosin staining**

1137 Fresh frozen and FFPE specimens were sliced to thicknesses of 4  $\mu\text{m}$  and subjected to hematoxylin and  
1138 eosin (H&E) staining. Histopathological slides of fresh frozen specimens were snap-fixed with 4%  
1139 paraformaldehyde phosphate buffer solution (FUJIFILM) for 10 min at room temperature, and the slides

1140 of FFPE specimens were deparaffinized and rehydrated via immersions in xylene (#241-00091;  
1141 FUJIFILM) and ethanol (#057-00451; FUJIFILM), respectively. Hematoxylin (#6187-4P; Sakura Finetek  
1142 Japan, Japan) and eosin (#8660; Sakura Finetek) solutions were then used to achieve H&E staining  
1143 following the manufacturer's protocols. The stained slides were dehydrated via immersions in ethanol  
1144 and xylene, respectively, after which glass coverslips (Matsunami Glass, Japan) with Marinol  
1145 (#4197193, Muto Pure Chemicals, Japan) were used to cover the stained slides. H&E-stained images  
1146 were then captured using a Hamamatsu Nanozoomer 2.0 HT whole slide scanner (Hamamatsu  
1147 Photonics K.K., Japan).

1148

### 1149 **Immunohistochemistry**

1150 For IHC, histopathological slides with FFPE specimens were deparaffinized and rehydrated via  
1151 immersions in xylene (#241-00091; FUJIFILM) and ethanol (#057-00451; FUJIFILM), respectively. The  
1152 slides were then autoclaved for 5 min at 120°C while immersed in citrate buffer (pH 6.0) (Abcam,  
1153 Cambridge, UK). Endogenous peroxidase activity was consumed using 0.3% hydrogen peroxide (Sigma  
1154 Aldrich, USA) in methanol (#137-01823; FUJIFILM) for 15 min, after which the slides were washed using  
1155 distilled water. Nonspecific protein–protein reactions were blocked by incubating the slides in 2% bovine  
1156 serum albumin (Sigma Aldrich, USA)/PBS (FUJIFILM) for 15 min at room temperature. The following  
1157 primary antibodies were used, which were incubated on the slide at 4°C overnight: GKN1 (1:1,000;  
1158 Merck, HPA047684), ADH1C (1:2,000; Abcam, ab238486), ACKR1 (1:200; Merck, HPA016421),  
1159 PLVAP (1:100; Merck, HPA002279), CD31 (1:100; Dako, M0823), LEFTY1 (1:1,000; Cell Signaling  
1160 Technology, #12647), CD44 (1:200; Abcam, ab157107), EFNB2 (1:200; Abcam, ab131536), EPHB2  
1161 (1:200; R&D systems, AF467), NKX6-3 (1:1,000; Merck, HPA042790), HOXB13 (1:3,000; Abcam,  
1162 ab201682), and TUBB3 (1:200; Abcam, ab52623). After washing the slides with PBS (FUJIFILM) three  
1163 times, Histostar (Ms+Rb) for Human Tissue (MBL, Japan) was used as a secondary antibody, and the  
1164 slides were washed using PBS (FUJIFILM) three times. IHC signals were developed using Histostar

1165 DAB Substrate Solution (MBL) according to the manufacturer's protocol. Nuclear staining was  
1166 performed using a hematoxylin (#6187-4P; Sakura Finetek Japan) solution. The stained slides were  
1167 dehydrated using immersions in ethanol followed by xylene, after which glass coverslips (Matsunami  
1168 Glass) with Marinol (#4197193; Muto Pure Chemicals) were used to cover the stained slides. IHC  
1169 images were captured using a Hamamatsu Nanozoomer 2.0 HT whole slide scanner (Hamamatsu  
1170 Photonics K.K., Japan).

1171

### 1172 **RNAScope**

1173 To achieve ISH, a RNAScope 2.5 HD Duplex Assay (Advanced Cell Diagnostics, Inc., Hayward, CA,  
1174 USA) was performed according to the manufacturer's instructions. The method used to prepare FFPE  
1175 samples was the same as that used for IHC analysis. A list of the probes used is provided in the key  
1176 resources table.

1177

### 1178 **Signal magnification of RNAScope**

1179 We extracted green or red signals from the image of RNAScope and magnified these signals 100 times  
1180 using python library cv2 and PIL. Green and red signal thresholds were defined manually.

1181

### 1182 **Table S1. Sample metadata.**

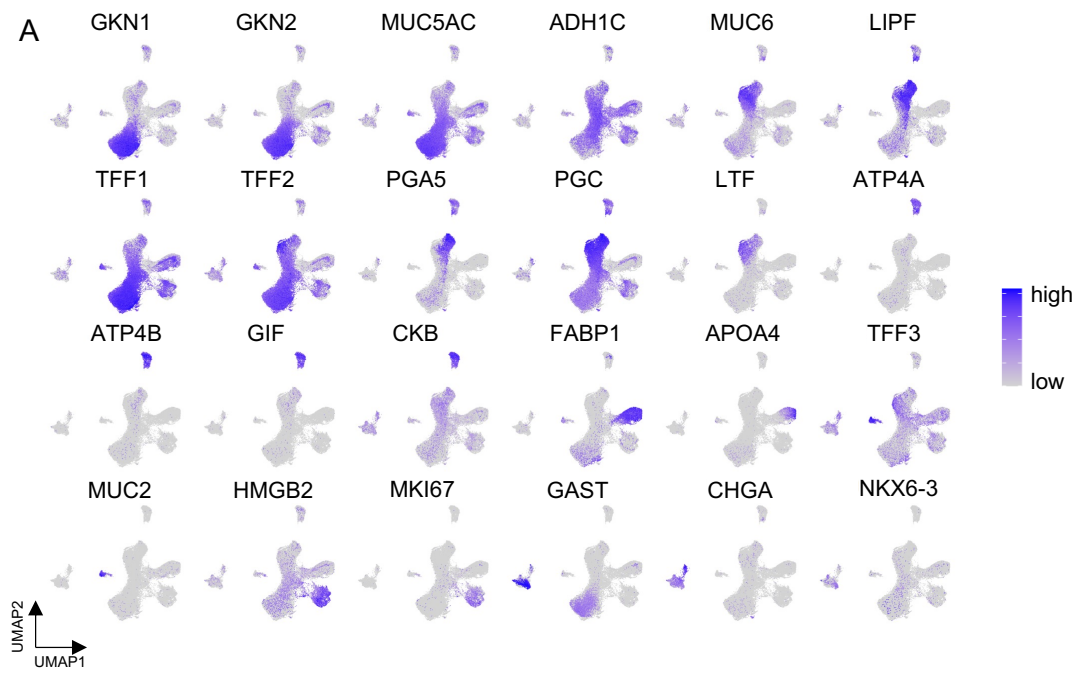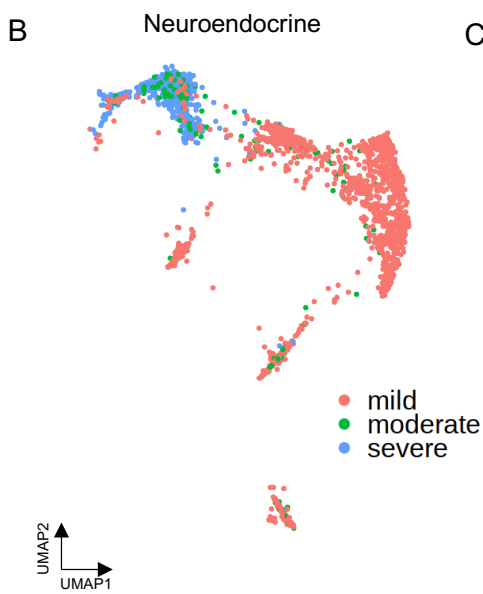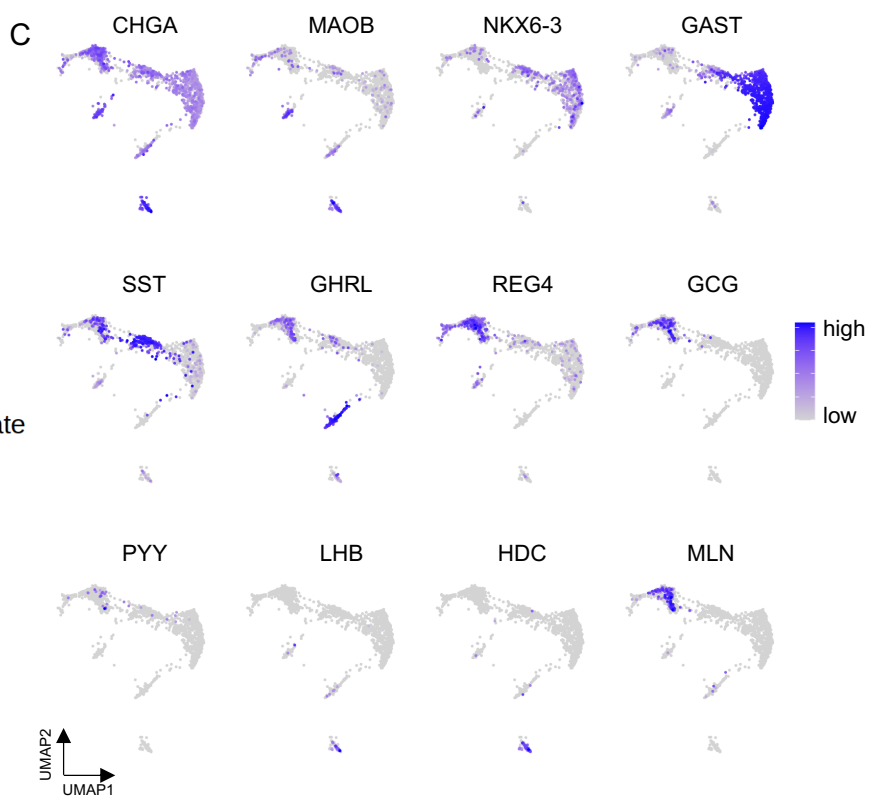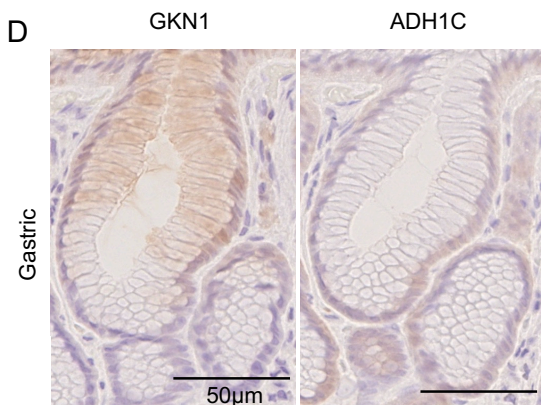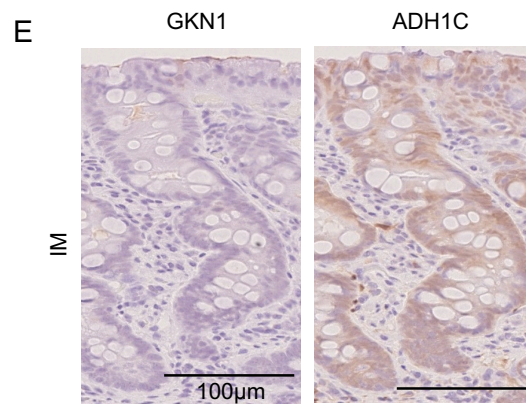

1184 **Figure S1. Marker genes of epithelial cells and neuroendocrine-specific cells (related to Figure**  
1185 **1).**

1186 (A) Representative epithelial cell marker gene expression selected from differentially expressed  
1187 genes.

1188 (B) UMAP of neuroendocrine cells with IM severeness. Almost all neuroendocrine cells from severe  
1189 or moderate IM samples express REG4.

1190 (C) Several enzymes and marker genes of neuroendocrine cells. Almost all *GAST*<sup>+</sup> cells are from  
1191 mild IM samples, and *GCG* and *MLN*<sup>+</sup> cells are from severe or moderate samples. Rare  
1192 neuroendocrine cells such as *LHB*<sup>+</sup> or *HDC*<sup>+</sup> cells were identified.

1193 (D, E) IHC of GKN1 and ADH1C in the stomach and IM, respectively. GKN1 expression is limited in  
1194 the superficial region in normal gastric mucosa. ADH1C expression is in the deeper region in  
1195 normal gastric mucosa and in all IM region.

1196



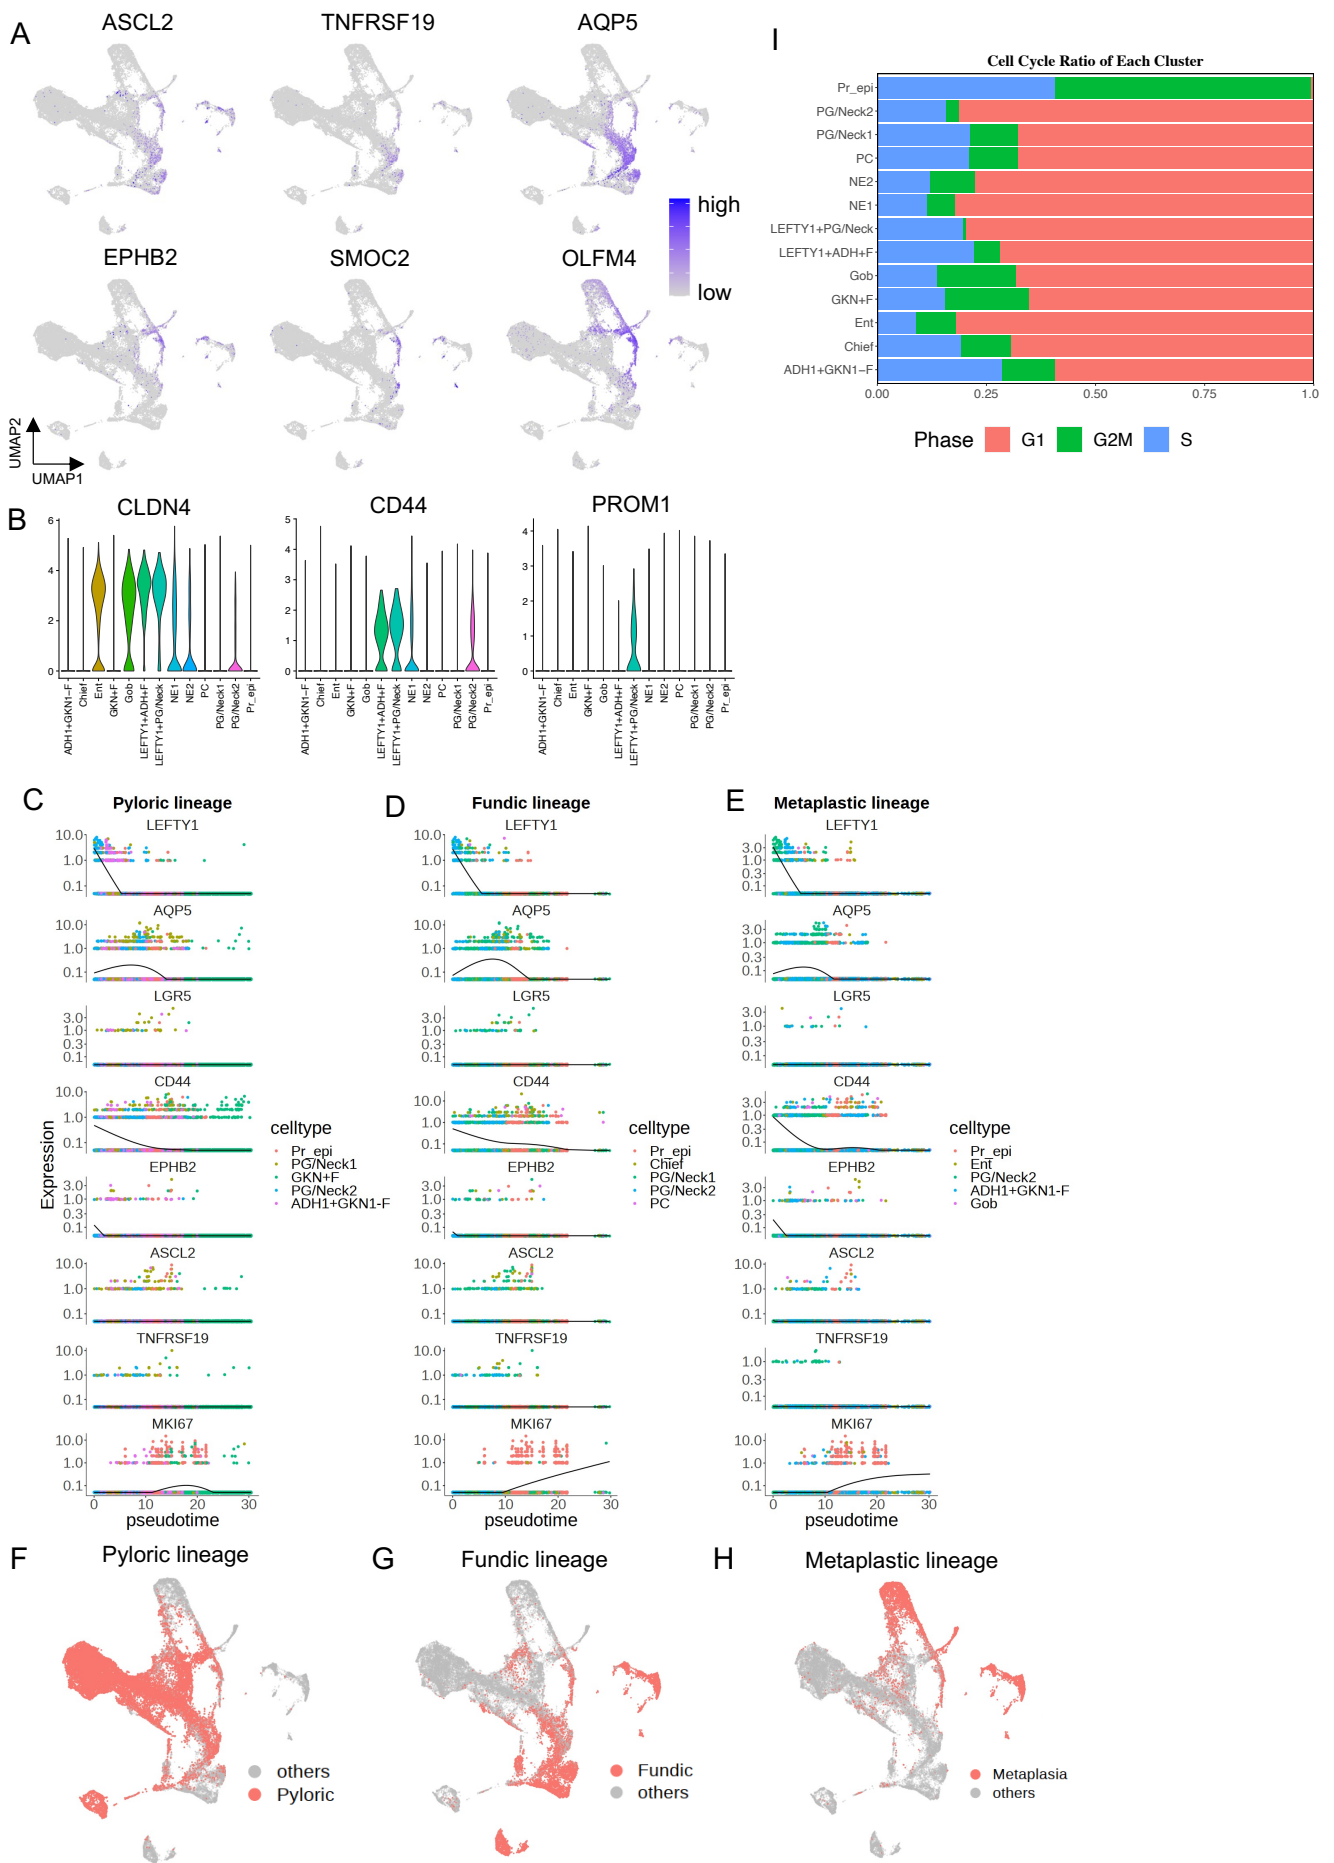

1198 **Figure S2. Gastrointestinal stemness-associated genes enriched in LEFTY1+ and pseudotime**  
1199 **dynamics (related to Figure 2).**

1200 (A, B) Stem cell-associated gene expression in the epithelial cells. These marker genes are  
1201 expressed in LEFTY1+ cells.

1202 (C–E) Pseudotime plots of representative stem cell markers in each lineage. LEFTY1 expression is  
1203 highest in the earliest time in pseudotime among other stemness-associated genes. MKI67  
1204 expression is high in the middle of the pseudotime.

1205 (F–H) UMAP showing each lineage cell; Pyloric lineages cell include GKN+F, ADH1+GKN1-F,  
1206 PG/Neck1, PG/Neck2, and Pr\_epi; Fundic lineage cells: PG/Neck1, PG/Neck2, PC, Chief,  
1207 Pr\_epi; Metaplastic lineage cells; PG/Neck2, ADH1+GKN1-F, Gob, Ent, Pr\_epi.

1208 (I) Proportion of cell cycle phases in each cluster. Almost all proliferating epithelial cells show G2M  
1209 or S phase. The G2M phase was detected less frequently in LEFTY1+ PG/Neck cells, which was  
1210 compatible with being quiescent. See methods for cell cycle analysis details.

1211

1212

**A**

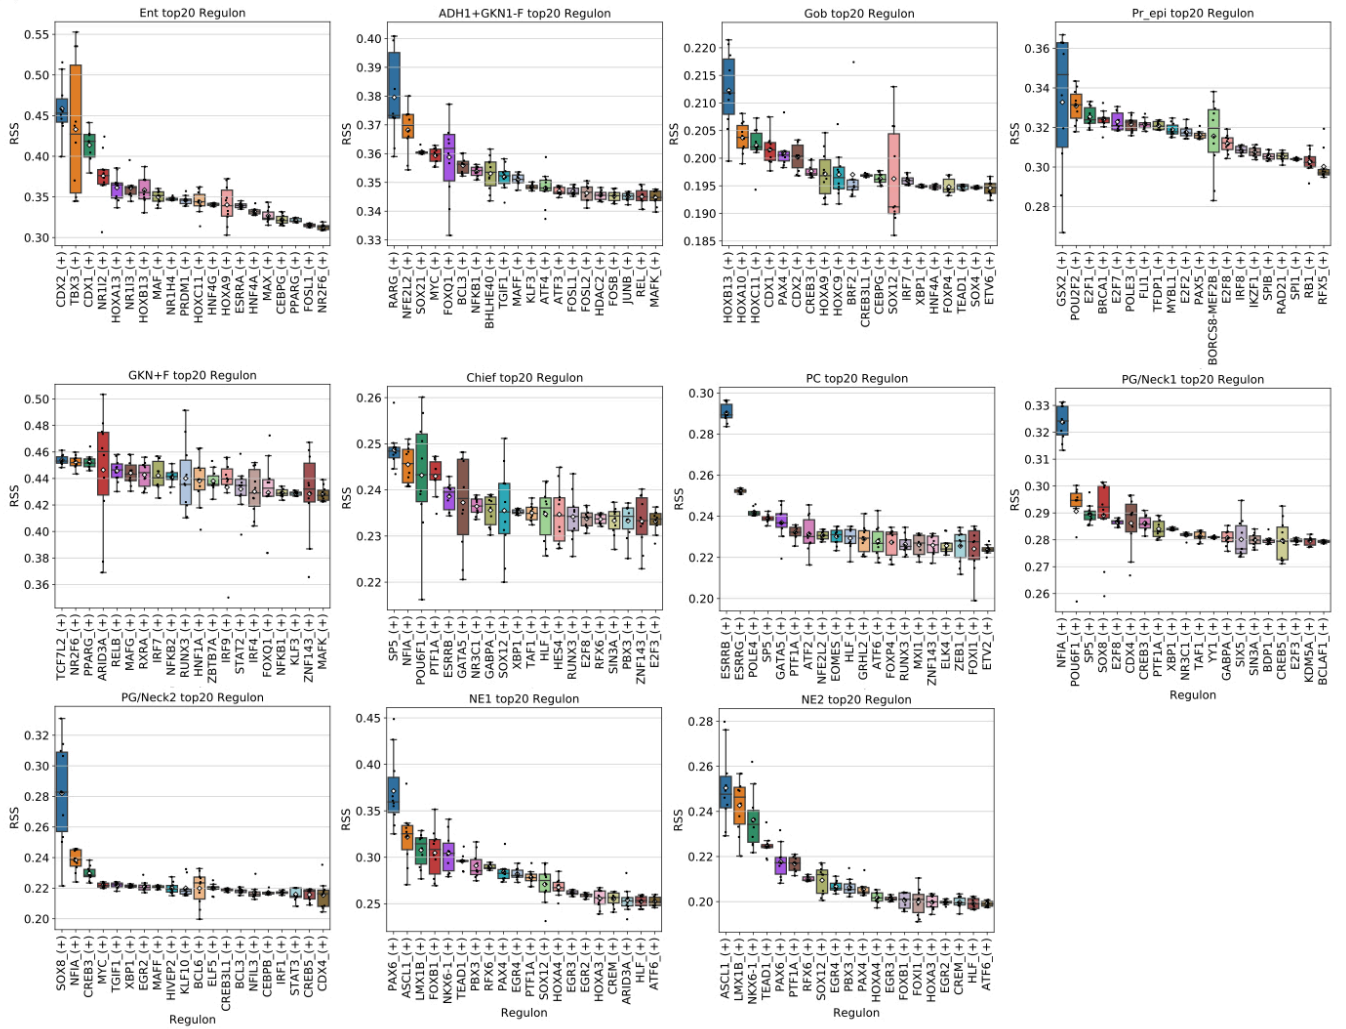

**B**

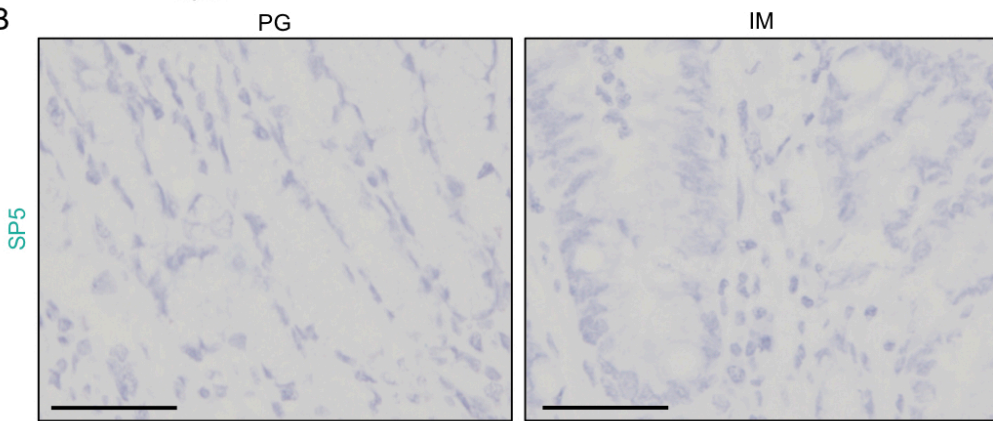

**C**

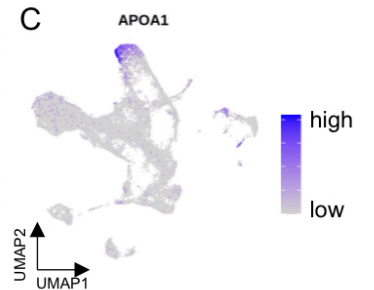

1213

1214 **Figure S3. Top 20 regulons, except LEFTY1+ cell clusters, in the epithelial cells (related to Figure**  
1215 **4).**

1216 (A) Boxplots show the results of gene regulatory network analysis in each cluster for the top 20  
1217 regulons with 10 times runs. NE clusters show high activities of ASCL1 and PAX6, PC cluster  
1218 shows high activities of ESRRB and ESRRG, and Ent cluster shows high activities of CDX2 and  
1219 CDX1. Fundic gland-specific clusters (PG/Neck1, PC, and chief cells) show a high activity of  
1220 SP5.

1221 (B) RNA-ISH of SP5 showing no signal detection in PG and IM. Scale bar: 50  $\mu$ m.

1222 (C) Expression of APOA1 is limited in the enterocytes.

1223

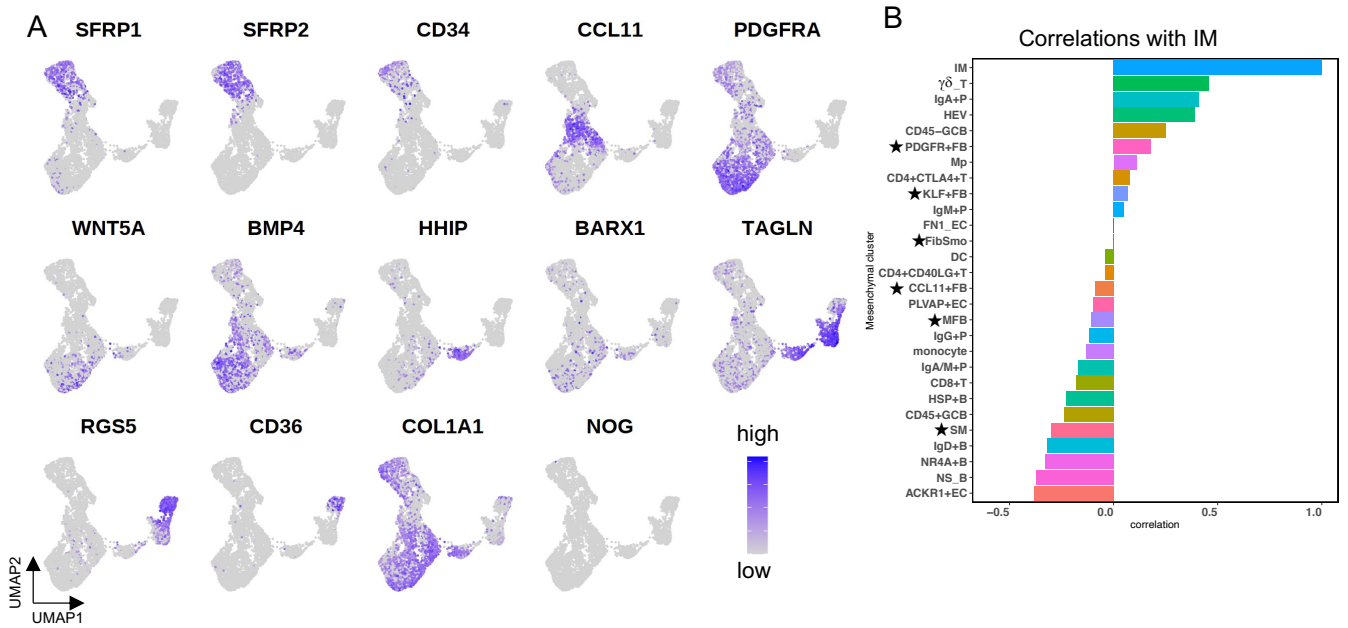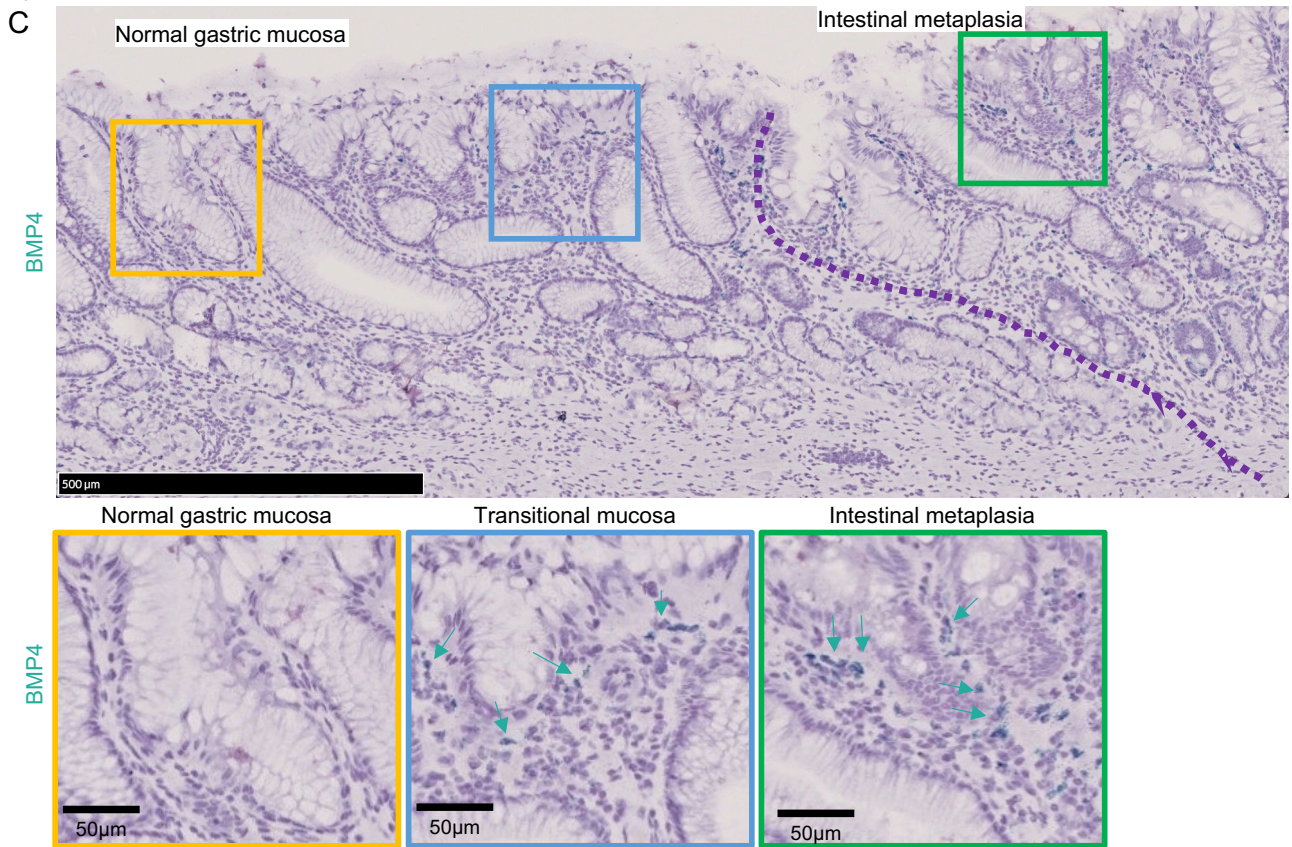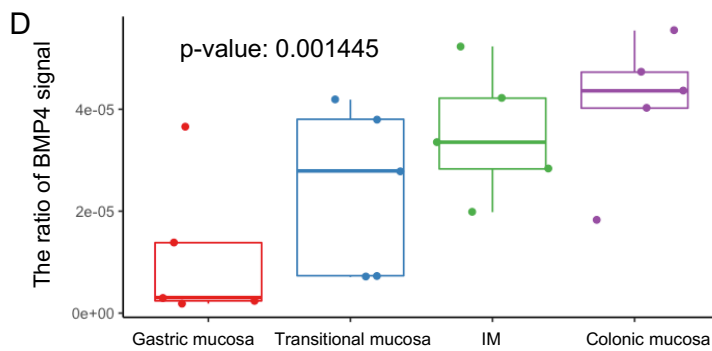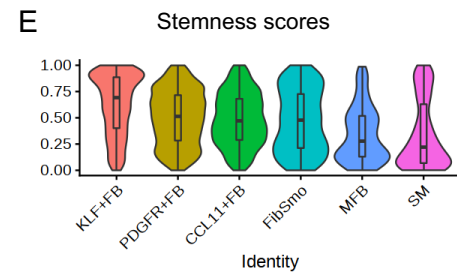

1225

1226 **Figure S4. Characteristics of fibroblast subtypes and BMP4-related analysis (related to Figure 5).**

1227 (A) Representative marker gene expression in fibroblasts. WNT5A and BMP4 expressions are  
1228 enriched in PDGFR+FB population, and HHIP expression are in FibSmos.

1229 (B) Bar plot showing the correlation between the number of metaplastic cells (the total of enterocytes  
1230 and goblet cells) and ratio of each stromal cell to the number of major clusters to which it  
1231 belongs. The ratio of PDGFR+FB is positively correlated with the number of metaplastic cells.  
1232 Each stromal cell ratio was calculated as the number of each subcluster divided by total cell  
1233 number of the same class. Note: the  $\gamma\delta$  T cell and PDGFR+FB ratio was calculated as the  
1234 number of  $\gamma\delta$  T cells divided by the total number of T cells and the number of PDGFR+FBs  
1235 divided by the total number of fibroblasts, respectively. \*: Fibroblasts

1236 (C) Another field of RNA-ISH of BMP4 in IM, transitional mucosa, and gastric mucosa in addition to  
1237 Figure 4C. In this field of view, the increase of BMP4 expression was also  
1238 observed  
1239 in the metaplastic gland and normal gastric mucosa adjacent to IM. Top panel: A low  
1240 magnification of stomach gland including IM, transitional mucosa, and gastric mucosa. Bottom  
1241 panel: A high magnification of each gland. The contour colors correspond with the colors of  
1242 squares in the top panel. Arrows: BMP4 signals.

1243 (D) The ratio of BMP4 green signal area in the stromal area in the field of view of the mucosal  
1244 surface in each gland. The monotonically increase of BMP4 from normal gastric mucosa to  
1245 metaplastic and colonic mucosa was observed ( $p=0.001445$ , two-sided Jonckheere-Terpstra  
1246 trend test).

1247 (E) Stemness scores in the fibroblasts. KLF+FB shows highest score, whereas MFB and SM show  
1248 lowest scores.

1249

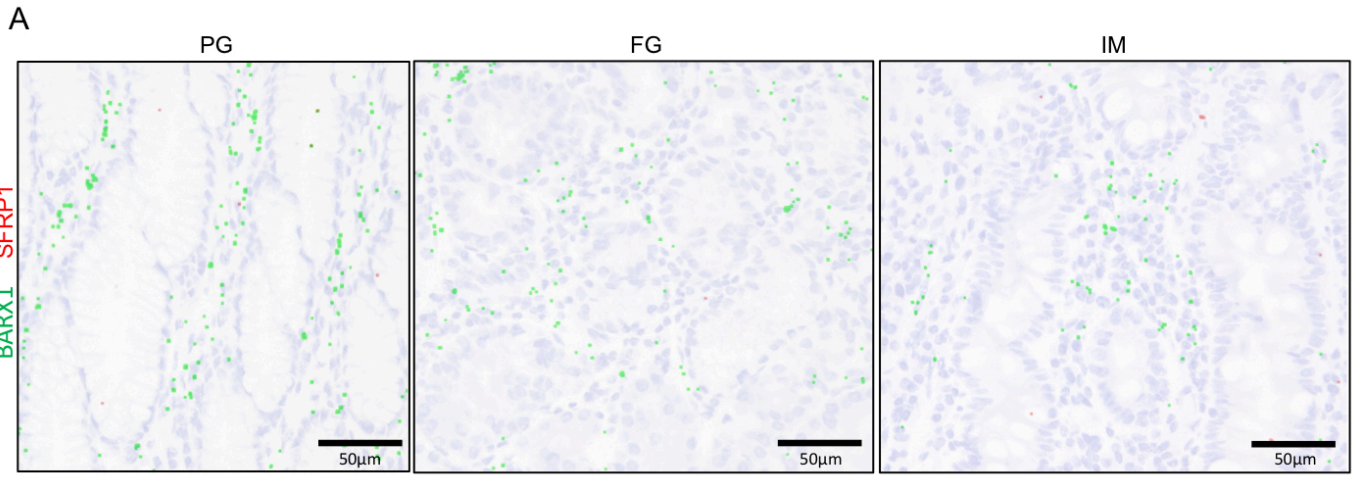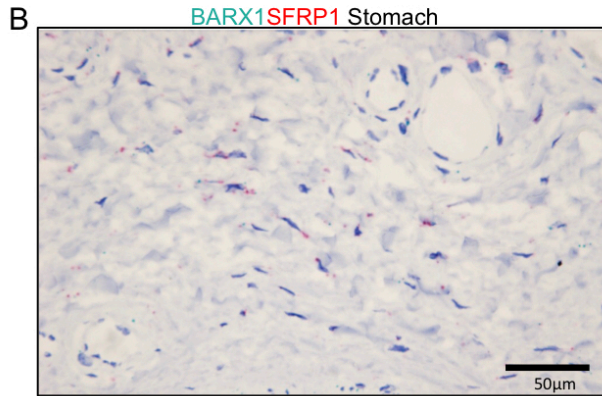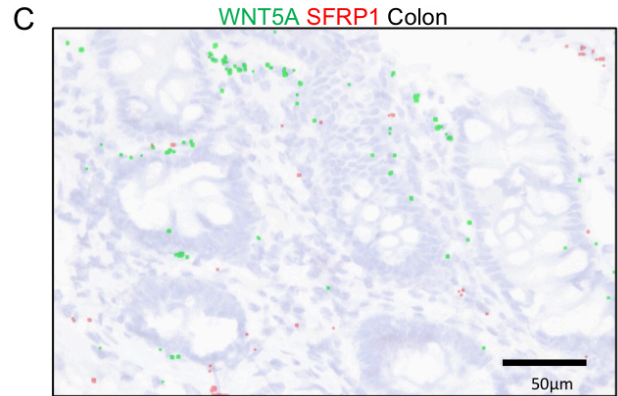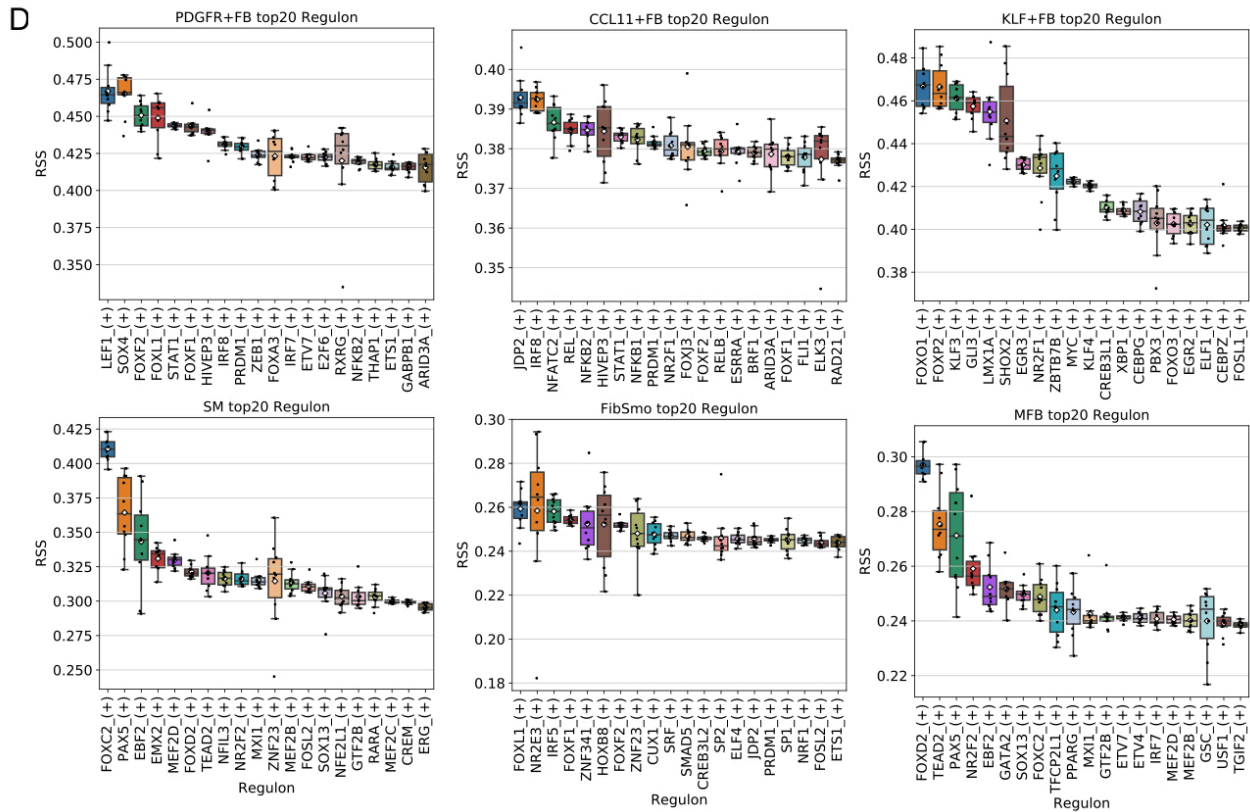

1250  
1251

1252 **Figure S5. Spatial distribution of BARX1, SFRP1 and WNT5A in the gastric and colonic mucosa**  
1253 **and regulon activity of fibroblasts (related to Figure 6).**

1254 (A) RNA-ISH of SFRP1 (red) and BARX1 (green) showing the lack of SFRP1 and BARX1  
1255 coexpression. SFRP1 expression was not observed in the mucosal lamina propria. Each signal  
1256 was expanded computationally.

1257 (B) RNA-ISH of BARX1 (green) and SFRP1 (red) in the gastric submucosal region. SFRP1  
1258 expression was limited in the submucosa in gastric mucosa. KLF+FBs existed in the submucosal  
1259 region because KLF+FBs specifically express SFRP1.

1260 (C) RNA-ISH of WNT5A (green) and SFRP1 (red) in colonic mucosa. SFRP1 was expressed in  
1261 mucosal lamina propria in colonic mucosa but not in stomach mucosa.

1262 (D) Boxplots showing the results of gene regulatory network analysis in each cluster for the top 20  
1263 regulons with 10 times runs. FOXF1, FOXF2, and FOXL1 transcription activities were  
1264 upregulated in PDGFR+ fibroblasts as well as FibSmo cells.

1265



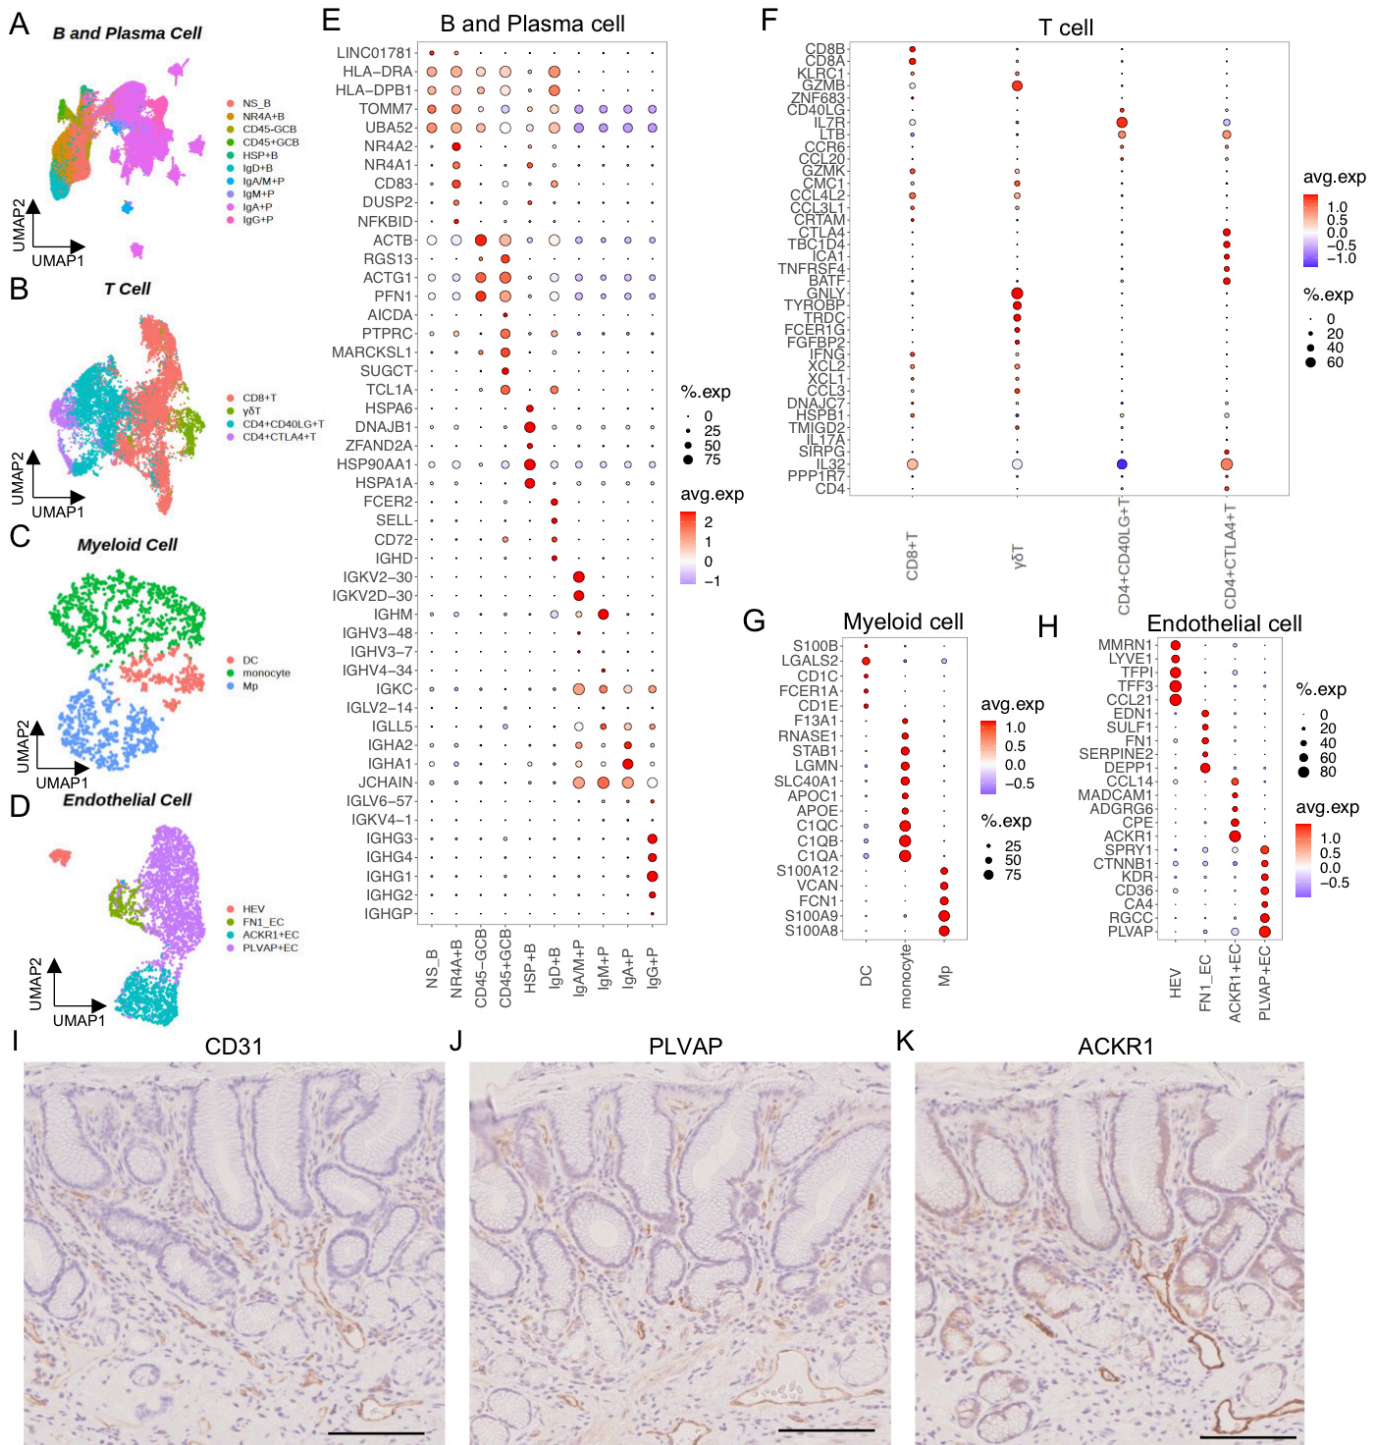

1266

1267 **Figure S6. Immune cell and endothelial cell characterization.**

1268 (A, E) B and plasma cell UMAP and dot plot showing subcluster marker genes.

1269 (B, F) T cell UMAP and dot plot showing subcluster marker genes.

1270 (C, G) Myeloid cell UMAP and dot plot showing subcluster marker genes.

1271 (D, H) Endothelial cell UMAP and dot plot showing subcluster marker genes.

1272 (I–K) Images of IHC showing the endothelial marker proteins CD31, PLVAP, and ACKR1. PLVAP

1273 was distributed in the entire mucosa. Compared with PLVAP, ACKR1 was found in a deeper

1274 region. Scale bar: 100 μm.

A

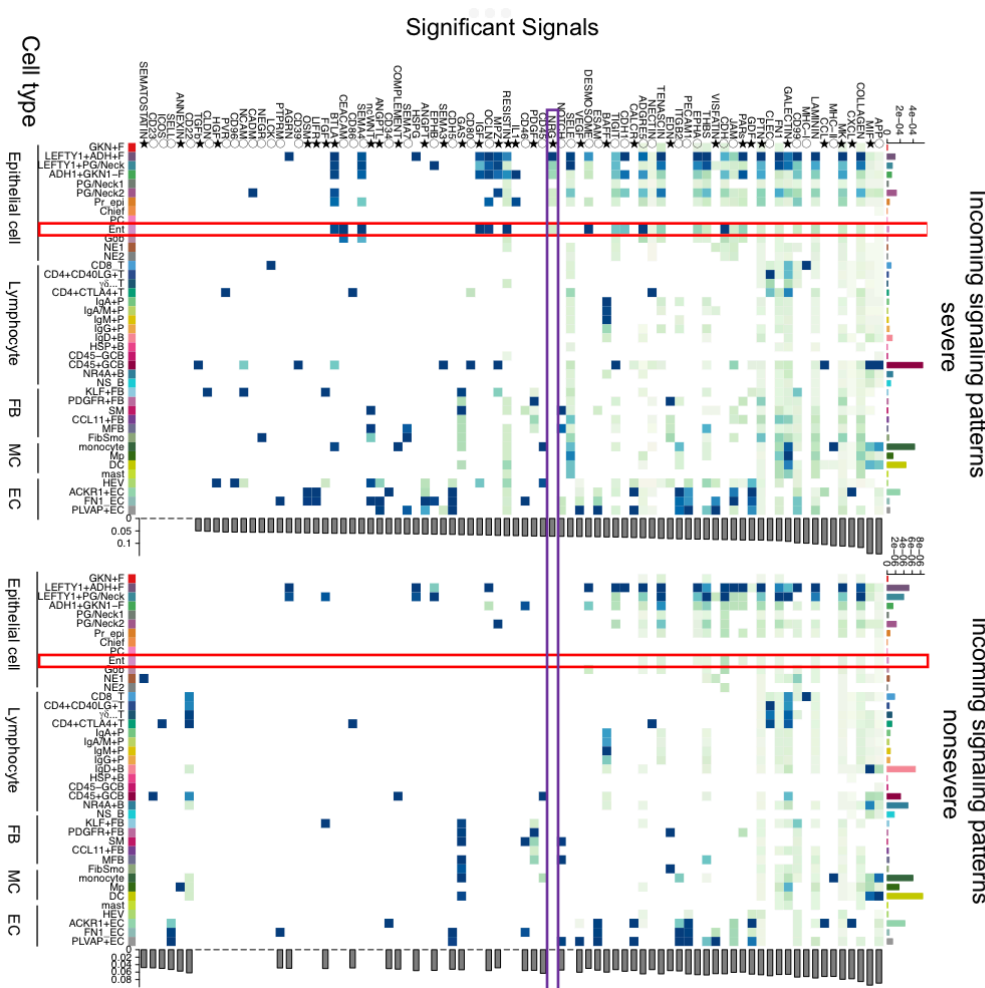

Incoming signaling patterns severe

Incoming signaling patterns nonsevere

B

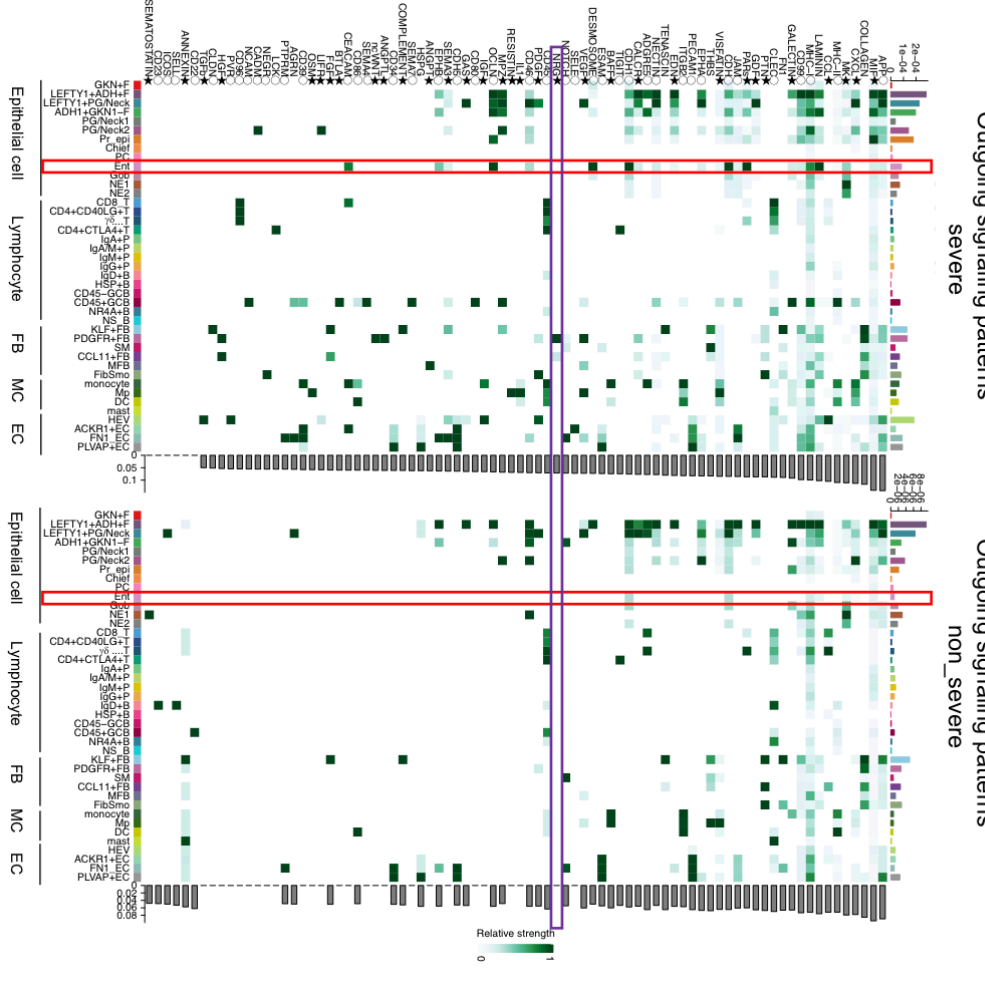

Outgoing signaling patterns severe

Outgoing signaling patterns non\_severe

1276 **Figure S7. Overview of cell–cell communications between IM severe samples and IM**  
1277 **mild/moderate samples (related to Figure 7).**

1278 (A, B) Overview of each cell-type and signaling patterns showing more interactions in the  
1279 enterocytes, fibroblasts, and myeloid cells of IM severe samples. Top bar plots showing the sum  
1280 of the communication probability calculated by cellchat library for each cell type. Right bar plots  
1281 showing the proportion of the contribution in each signal to the total. Heatmaps showing relative  
1282 strength for each cell type in each signaling. Red square: enterocytes; purple square: NRG  
1283 signaling; \*: secreting signals; O: cell–cell contact; no symbols: extracellular matrix. Jin et al.  
1284 (2021) reported the signal ligand and receptor pair details.  
1285

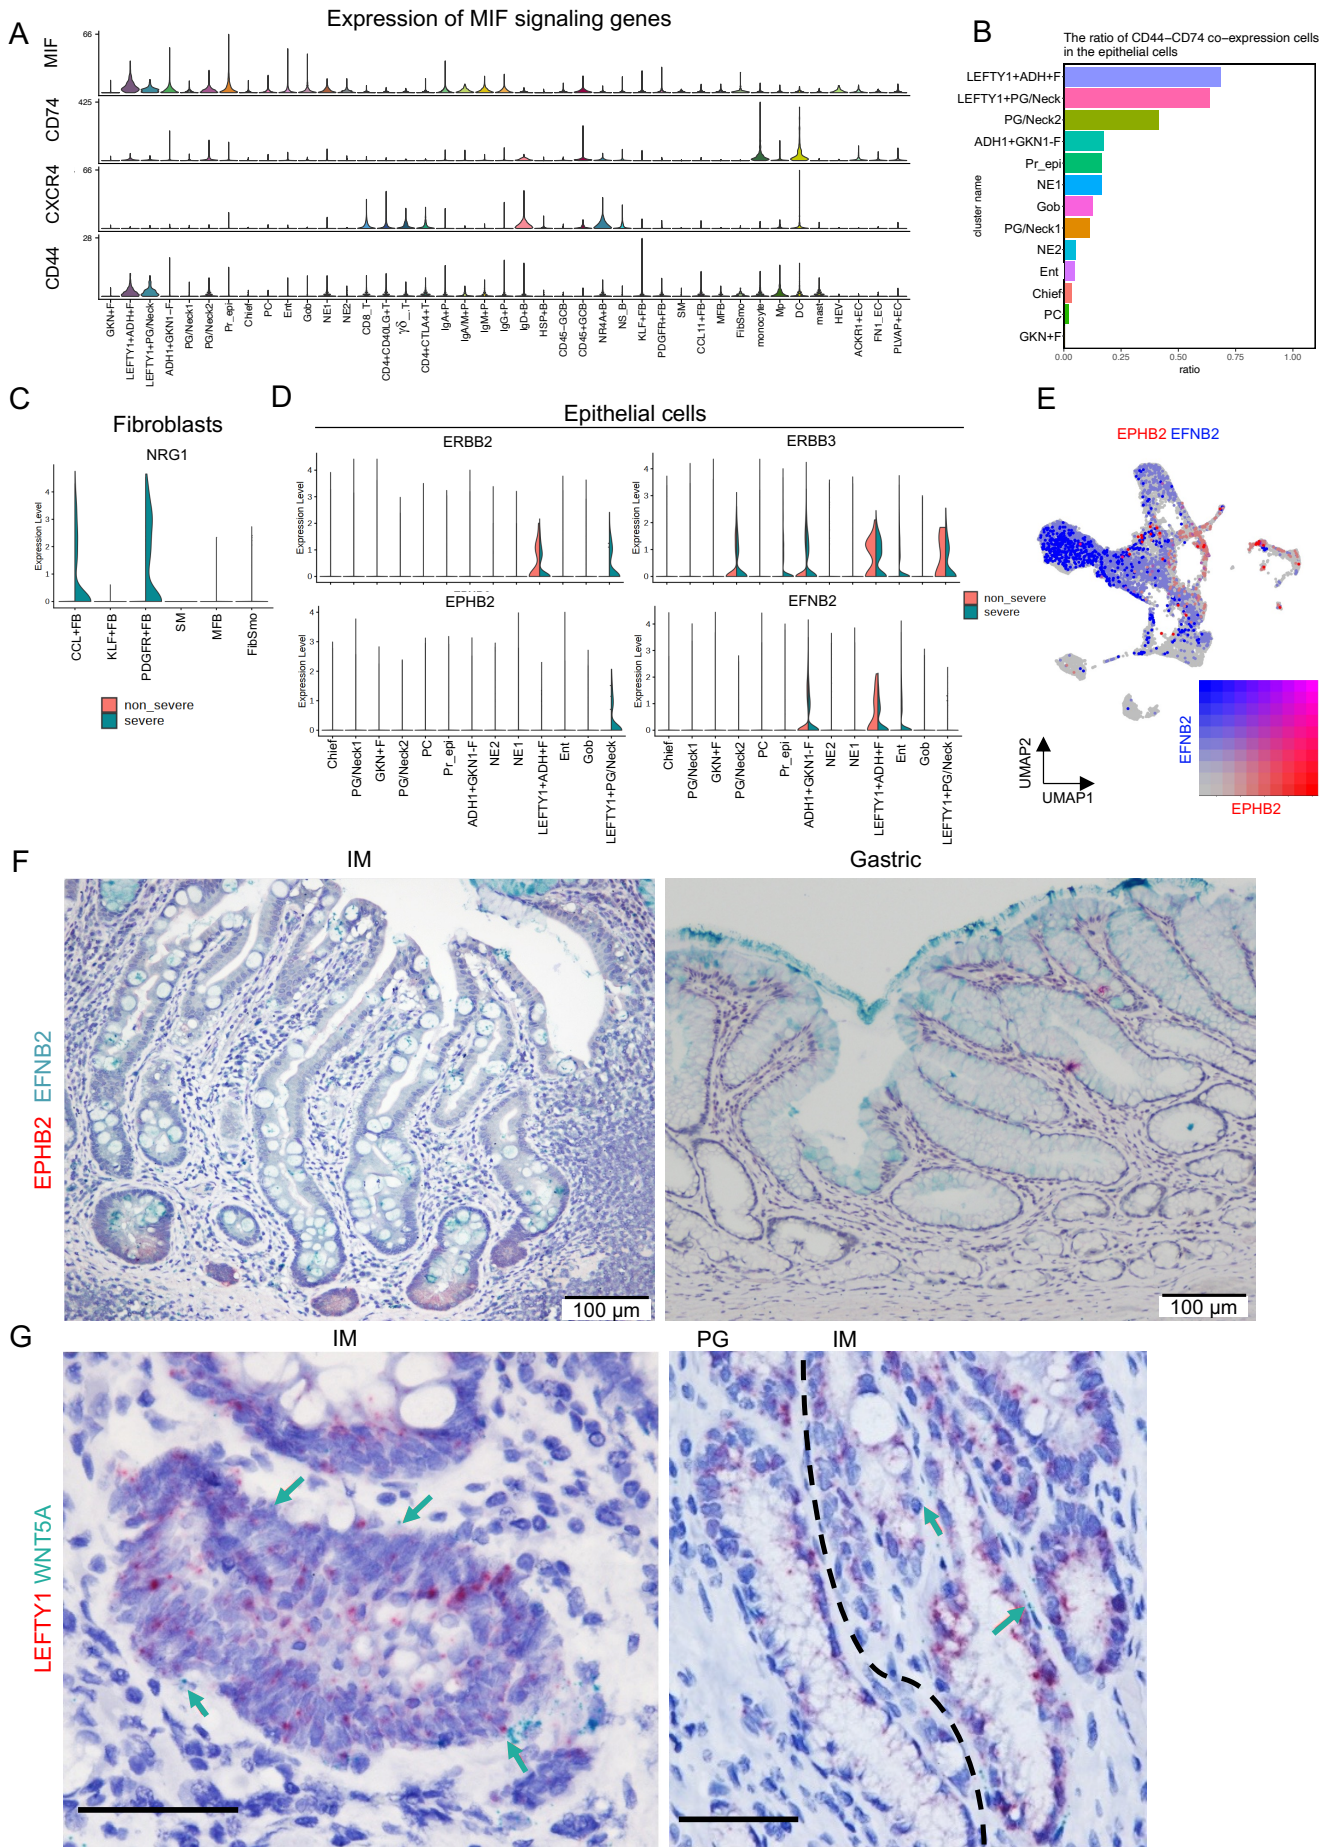

1287 **Figure S8. Representative expression of ligand and receptor genes and proteins in the**  
1288 **transcriptional profile and human tissue (related to Figure 7).**

- 1289 (A) Violin plots showing MIF signaling genes in the all-cluster cells. CD44 and MIF expressions are  
1290 highest in LEFTY1+cells, whereas CXCR4 expression is highest in B cell clusters.
- 1291 (B) Percentage of cells with CD44–CD74 coexpression in epithelial cells. LEFTY1+cells show higher  
1292 scores than other epithelial cells.
- 1293 (C) NRG1 expression is limited in PDGFR+FB and CCL11+FB from IM severe samples. Left half:  
1294 expression of cells derived from IM severe samples; right half: expression of cells derived from  
1295 IM mild and moderate samples.
- 1296 (D) NRG receptor (ERBB2 and ERBB3) and EPHB signaling (EPHB2 and EFNB2) genes expression  
1297 in epithelial cells. Left half: expression of cells derived from IM severe samples; right half:  
1298 expression of cells derived from IM mild and moderate samples.
- 1299 (E) EFNB2 and EPHB2 expression in epithelial cells (blue: EFNB2; red: EPHB2). EPHB2 expression  
1300 was enriched in LEFTY1+ cells, and EFNB2 expression is higher in GKN1+F and enterocytes.
- 1301 (F) IHC of EFNB2 (green) and EPHB2 (red) in IM and PG. EPHB2 expression was observed in the  
1302 base crypt of IM samples, and EFNB2 expression was observed in the superficial mucosa both  
1303 in IM and gastric mucosa.
- 1304 (G) RNA *in situ* hybridization of LEFTY1 (red) and WNT5A (green) in IM and PG. WNT5A  
1305 expression was observed in the invaginations of IM, showed in Miyoshi et al., 2012. Black  
1306 dashed line shows the border of IM and the PG. Arrows: WNT5A. Scale bar: 50  $\mu$ m.  
1307

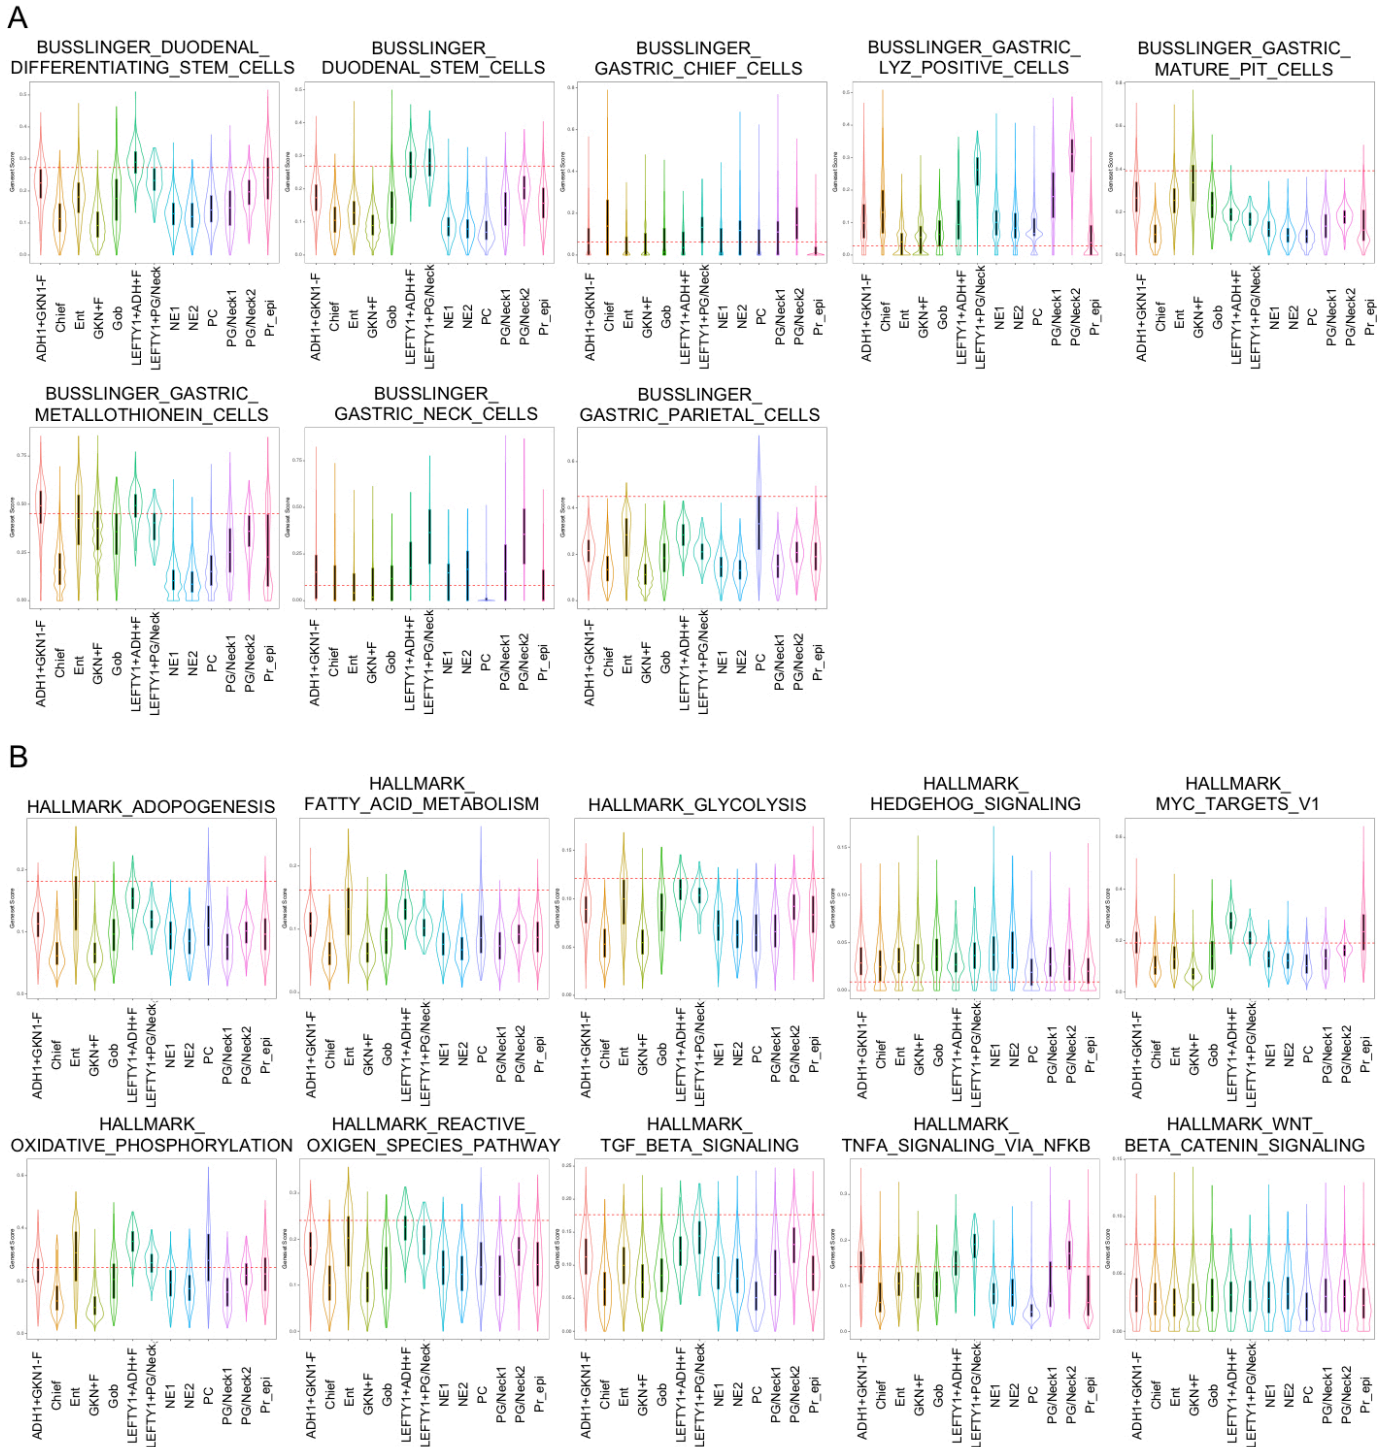

1308

1309 **Figure S9. Gene set enrichment analysis of epithelial cells (related to Figures 2–4).**

1310 (A) Combined violin plots and box plots showing upper gastrointestinal marker gene scores defined  
 1311 by Busslinger et al. (2021). These gene set scores were clearly enriched in our parietal, chief,  
 1312 and neck cell populations, respectively.

1313 (B) Combined violin plots and box plots showing HALLMARK pathway scores in each epithelial cell.  
 1314 LEFTY1+ cells show high scores of MYC pathway and metabolic-related gene sets such as  
 1315 adipogenesis, fatty acid metabolism, glycolysis, oxidative phosphorylation, and reactive oxygen  
 1316 species pathways.

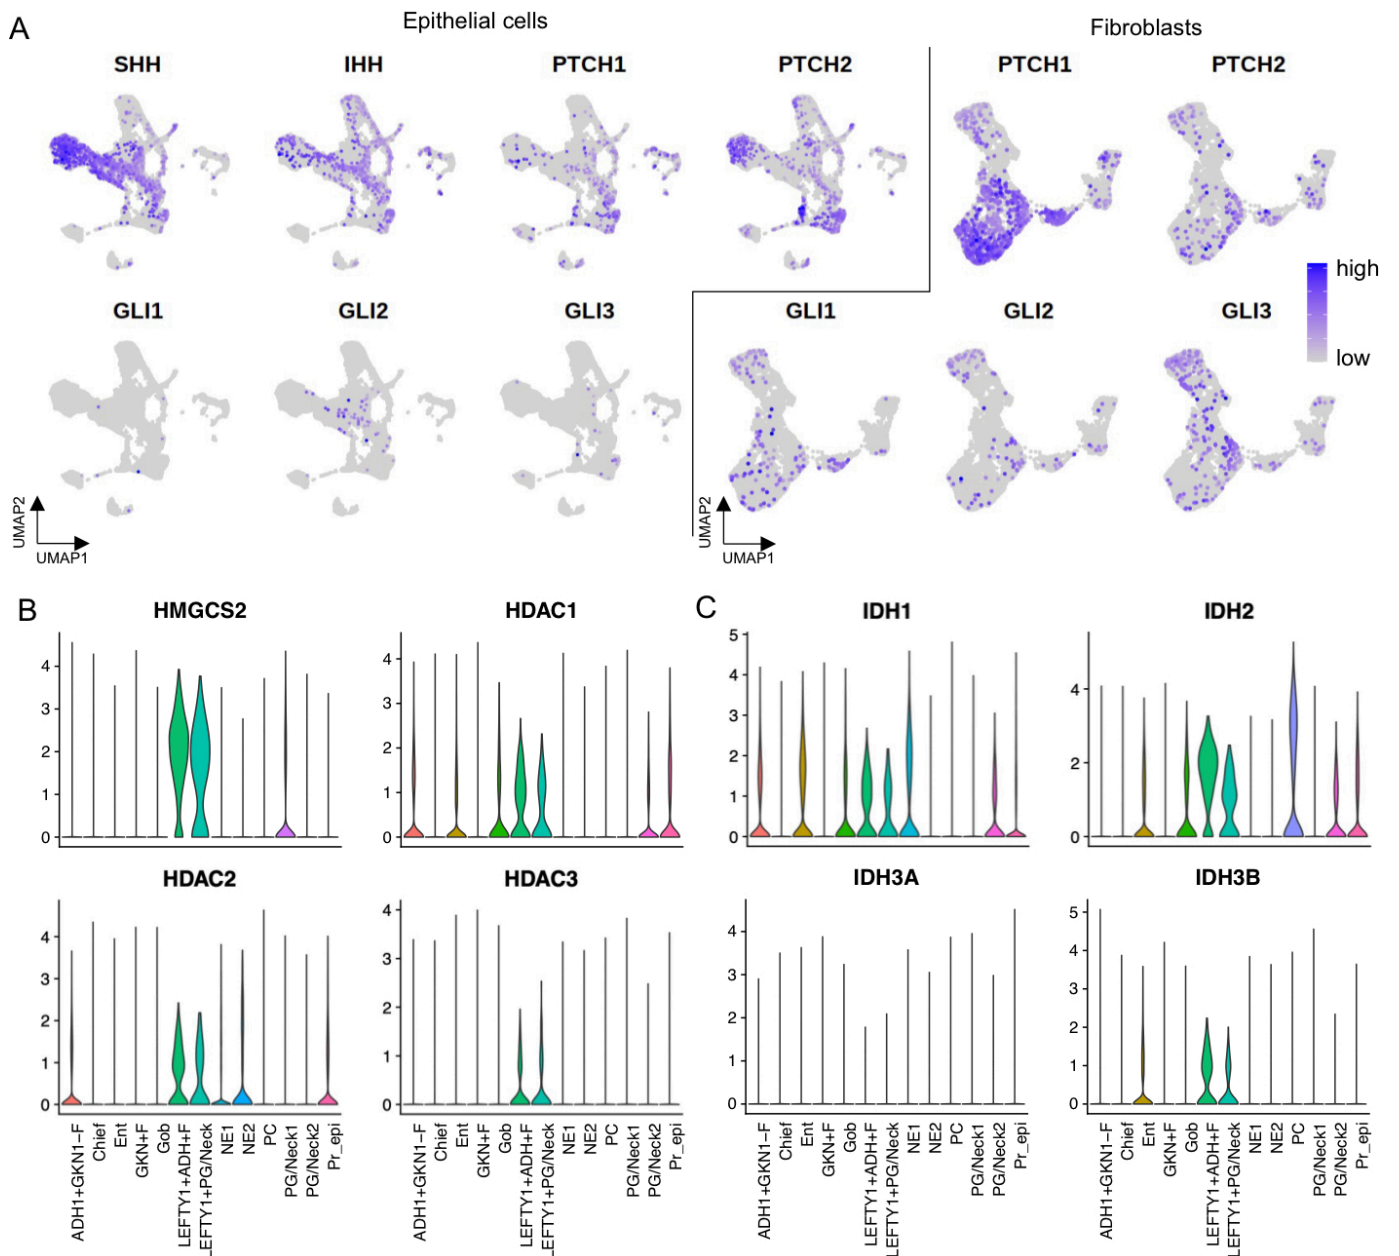

1317

1318

**Figure S10. Hedgehog signaling- and metabolite-related gene expression (related to Figure 7).**

1319

1320

1321

1322

1323

1324

1325

1326

(A) Feature plots showing hedgehog signaling-related genes. SHH expression is limited in gastric lineage, whereas IHH is expressed in both epithelial cells of gastric lineages and metaplastic lineages, respectively. *PTCH1* and *PTCH2* are expressed occasionally in some PG/Neck1 cells and PDGFR+ fibroblasts, and the downstream effectors of Hedgehog, *GLI1*, *GLI2*, and *GLI3*, are expressed modestly in diverse subtypes of epithelial cells and fibroblasts. Left of the black line: epithelial cells; right of the black line: fibroblasts.

(B, C) Violin plots showing HMGCS2, HDAC, and IDH expression in epithelial cells. Metabolite-related genes are higher in LEFTY1+ cells.
